# Supplementary material for: Astrocytes release prostaglandin E2 to modify respiratory network activity
Source: eLife. 2017 Oct 6;6:e29566. doi: 10.7554/eLife.29566 (PMC5648524; doi:10.7554/eLife.29566)
Supplement: Figure 1—source data 1. [file elife-29566-fig1-data1.xlsx]

## Sheet: IHC quantification
Image	Slice	Region	Antibody 1	Genetic stain	Stained cells 1	Stained cells 2	Double-labeled	Average stained cells 1	Average stained cells 2	Average Double	% of stain 2 double	% of stain 1 double				Average number of cells per slice		% of stain 2 double	% of stain 1 double			Number of slices
170309_03-1	1	preBötC	NK1R	GFP	40	173	0									GFP	187.954					NK1R	11
170309_03-2	1	preBötC	NK1R	GFP	41	226	0									GFAP	84.0961	41.7971	99.0175			GFAP	11
170309_03-3	1	preBötC	NK1R	GFP	28	245	0									S100B	31.4725	12.3166	92.2189			MAP2	10
170309_03-4	1	preBötC	NK1R	GFP	47	171	0									NK1R	37.3841	0	0			Iba1	11
170309_03-5	1	preBötC	NK1R	GFP	27	224	0									MAP2	84.3445	0	0			S100B	13
170309_03-6	1	preBötC	NK1R	GFP	21	203	0	34	207	0	0	0				Iba1	22.5642	0	0
170309_03-7	2	preBötC	NK1R	GFP	28	244	0
170309_03-8	2	preBötC	NK1R	GFP	49	270	0
170309_03-9	2	preBötC	NK1R	GFP	51	224	0									Total number of stained cells:
170309_03-10	2	preBötC	NK1R	GFP	36	245	0									GFP	66992
170309_03-11	2	preBötC	NK1R	GFP	20	164	0									GFAP	925
170309_03-12	2	preBötC	NK1R	GFP	17	197	0	33.5	224	0	0	0				S100B	409
170309_03-13	3	preBötC	NK1R	GFP	16	223	0									NK1R	411
170309_03-14	3	preBötC	NK1R	GFP	42	150	0									MAP2	843	1254
170309_03-15	3	preBötC	NK1R	GFP	37	157	0									Iba1	248
170309_03-16	3	preBötC	NK1R	GFP	44	199	0
170309_03-17	3	preBötC	NK1R	GFP	45	235	0
170309_03-18	3	preBötC	NK1R	GFP	40	247	0
170309_03-19	3	preBötC	NK1R	GFP	47	233	0	38.7143	206.286	0	0	0
170309_04-1	1	preBötC	GFAP	GFP	160	241	158
170309_04-2	1	preBötC	GFAP	GFP	138	163	138
170309_04-3	1	preBötC	GFAP	GFP	166	166	162
170309_04-4	1	preBötC	GFAP	GFP	151	248	150
170309_04-5	1	preBötC	GFAP	GFP	161	219	159	155.2	207.4	153.4	73.9634	98.8402
170309_04-6	2	preBötC	GFAP	GFP	165	181	165
170309_04-7	2	preBötC	GFAP	GFP	167	243	164
170309_04-8	2	preBötC	GFAP	GFP	159	221	159
170309_04-9	2	preBötC	GFAP	GFP	121	162	118
170309_04-10	2	preBötC	GFAP	GFP	167	247	163
170309_04-11	2	preBötC	GFAP	GFP	120	175	116	149.833	204.833	147.5	72.0098	98.4427
170309_04-12	3	preBötC	GFAP	GFP	152	186	101
170309_04-13	3	preBötC	GFAP	GFP	139	239	136
170309_04-14	3	preBötC	GFAP	GFP	150	162	150
170309_04-15	3	preBötC	GFAP	GFP	162	195	162
170309_04-16	3	preBötC	GFAP	GFP	177	245	172	156	205.4	139.75	68.038	94.1245
170309_05-1	1	preBötC	S100B	GFP	26	160	24
170309_05-2	1	preBötC	S100B	GFP	37	194	34
170309_05-3	1	preBötC	S100B	GFP	28	202	25
170309_05-4	1	preBötC	S100B	GFP	38	232	36
170309_05-5	1	preBötC	S100B	GFP	30	216	27
170309_05-6	1	preBötC	S100B	GFP	24	207	22
170309_05-7	1	preBötC	S100B	GFP	31	234	28
170309_05-8	1	preBötC	S100B	GFP	42	227	39	32	209	29.375	14.055	91.7969
170309_05-9	2	preBötC	S100B	GFP	47	179	42
170309_05-10	2	preBötC	S100B	GFP	38	196	37
170309_05-11	2	preBötC	S100B	GFP	49	210	42
170309_05-12	2	preBötC	S100B	GFP	36	229	36
170309_05-13	2	preBötC	S100B	GFP	48	164	32
170309_05-14	2	preBötC	S100B	GFP	19	199	18
170309_05-15	2	preBötC	S100B	GFP	49	167	49	40.8571	192	36.5714	9.47147	97.8713
170309_06-1	1	preBötC	MAP2	GFP	68	182	0
170309_06-2	1	preBötC	MAP2	GFP	87	233	0
170309_06-3	1	preBötC	MAP2	GFP	85	248	0
170309_06-4	1	preBötC	MAP2	GFP	55	191	0
170309_06-5	1	preBötC	MAP2	GFP	61	234	0
170309_06-6	1	preBötC	MAP2	GFP	51	167	0	67.8333	209.167	0	0	0
170309_06-7	2	preBötC	MAP2	GFP	121	233	0
170309_06-8	2	preBötC	MAP2	GFP	84	212	0
170309_06-9	2	preBötC	MAP2	GFP	94	181	0
170309_06-10	2	preBötC	MAP2	GFP	61	178	0
170309_06-11	2	preBötC	MAP2	GFP	91	200	0
170309_06-12	2	preBötC	MAP2	GFP	77	237	0	88	206.833	0	0	0
170309_06-13	3	preBötC	MAP2	GFP	116	211	0
170309_06-14	3	preBötC	MAP2	GFP	64	235	0
170309_06-15	3	preBötC	MAP2	GFP	70	248	0
170309_06-16	3	preBötC	MAP2	GFP	72	189	0
170309_06-17	3	preBötC	MAP2	GFP	71	184	0
170309_06-18	3	preBötC	MAP2	GFP	122	238	0	85.8333	217.5	0	0	0
170304_01-1	1	preBötC	Iba1	GFP	44	208	0
170304_01-2	1	preBötC	Iba1	GFP	47	236	0
170304_01-3	1	preBötC	Iba1	GFP	15	230	0
170304_01-4	1	preBötC	Iba1	GFP	26	212	0
170304_01-5	1	preBötC	Iba1	GFP	13	206	0
170304_01-6	1	preBötC	Iba1	GFP	37	159	0
170304_01-7	1	preBötC	Iba1	GFP	32	174	0
170304_01-8	1	preBötC	Iba1	GFP	34	168	0	26.1667	191.5	0	0	0
170304_01-9	2	preBötC	Iba1	GFP	25	197	0
170304_01-10	2	preBötC	Iba1	GFP	45	210	0
170304_01-11	2	preBötC	Iba1	GFP	40	202	0
170304_01-12	2	preBötC	Iba1	GFP	27	164	0
170304_01-13	2	preBötC	Iba1	GFP	15	188	0
170304_01-14	2	preBötC	Iba1	GFP	24	164	0
170304_01-15	2	preBötC	Iba1	GFP	42	161	0
170304_01-16	2	preBötC	Iba1	GFP	48	239	0	33.25	190.625	0	0	0
170304_02-1	1	pFRG/RTN	NK1R	GFP	30	196	0
170304_02-2	1	pFRG/RTN	NK1R	GFP	21	208	0
170304_02-3	1	pFRG/RTN	NK1R	GFP	49	191	0
170304_02-4	1	pFRG/RTN	NK1R	GFP	47	189	0
170304_02-5	1	pFRG/RTN	NK1R	GFP	47	188	0
170304_02-6	1	pFRG/RTN	NK1R	GFP	22	168	0
170304_02-7	1	pFRG/RTN	NK1R	GFP	31	175	0	36.1667	186.5	0	0	0
170304_02-8	2	pFRG/RTN	NK1R	GFP	13	189	0
170304_02-9	2	pFRG/RTN	NK1R	GFP	38	201	0
170304_02-10	2	pFRG/RTN	NK1R	GFP	36	155	0
170304_02-11	2	pFRG/RTN	NK1R	GFP	40	239	0
170304_02-12	2	pFRG/RTN	NK1R	GFP	42	219	0
170304_02-13	2	pFRG/RTN	NK1R	GFP	42	156	0	35.1667	193.167	0	0	0
170304_02-14	3	pFRG/RTN	NK1R	GFP	43	173	0
170304_02-15	3	pFRG/RTN	NK1R	GFP	37	243	0
170304_02-16	3	pFRG/RTN	NK1R	GFP	41	166	0
170304_02-17	3	pFRG/RTN	NK1R	GFP	36	207	0
170304_02-18	3	pFRG/RTN	NK1R	GFP	41	201	0
170304_02-19	3	pFRG/RTN	NK1R	GFP	46	151	0
170304_02-20	3	pFRG/RTN	NK1R	GFP	15	160	0
170304_02-21	3	pFRG/RTN	NK1R	GFP	35	199	0	36.75	187.5	0	0	0
170304_03-1	1	pFRG/RTN	GFAP	GFP	62	218	62
170304_03-2	1	pFRG/RTN	GFAP	GFP	47	153	47
170304_03-3	1	pFRG/RTN	GFAP	GFP	40	158	40
170304_03-4	1	pFRG/RTN	GFAP	GFP	68	228	68	54.25	189.25	54.25	28.6658	100
170304_03-5	2	pFRG/RTN	GFAP	GFP	55	183	55
170304_03-6	2	pFRG/RTN	GFAP	GFP	67	225	67
170304_03-7	2	pFRG/RTN	GFAP	GFP	61	221	61
170304_03-8	2	pFRG/RTN	GFAP	GFP	66	216	66
170304_03-9	2	pFRG/RTN	GFAP	GFP	60	208	60
170304_03-10	2	pFRG/RTN	GFAP	GFP	71	246	71	63.3333	216.5	63.3333	29.2533	100
170304_03-11	3	pFRG/RTN	GFAP	GFP	58	220	58
170304_03-12	3	pFRG/RTN	GFAP	GFP	51	185	51
170304_03-13	3	pFRG/RTN	GFAP	GFP	64	201	64
170304_03-14	3	pFRG/RTN	GFAP	GFP	69	207	69
170304_03-15	3	pFRG/RTN	GFAP	GFP	31	152	31
170304_03-16	3	pFRG/RTN	GFAP	GFP	30	157	30	50.5	187	50.5	27.0053	100
170304_04-1	1	pFRG/RTN	S100B	GFP	27	164	25
170304_04-2	1	pFRG/RTN	S100B	GFP	39	246	36
170304_04-3	1	pFRG/RTN	S100B	GFP	28	206	22
170304_04-4	1	pFRG/RTN	S100B	GFP	22	240	21
170304_04-5	1	pFRG/RTN	S100B	GFP	16	174	16
170304_04-6	1	pFRG/RTN	S100B	GFP	10	247	9	23.6667	212.833	21.5	10.1018	90.8451
170304_04-7	2	pFRG/RTN	S100B	GFP	46	218	41
170304_04-8	2	pFRG/RTN	S100B	GFP	37	166	30
170304_04-9	2	pFRG/RTN	S100B	GFP	41	192	32
170304_04-10	2	pFRG/RTN	S100B	GFP	37	190	31
170304_04-11	2	pFRG/RTN	S100B	GFP	51	215	44
170304_04-12	2	pFRG/RTN	S100B	GFP	36	224	31	41.3333	200.833	34.8333	17.3444	93.2476
170304_04-13	3	pFRG/RTN	S100B	GFP	41	205	28
170304_04-14	3	pFRG/RTN	S100B	GFP	48	164	42
170304_04-15	3	pFRG/RTN	S100B	GFP	47	218	31
170304_04-16	3	pFRG/RTN	S100B	GFP	37	187	26
170304_04-17	3	pFRG/RTN	S100B	GFP	31	189	22
170304_04-18	3	pFRG/RTN	S100B	GFP	42	232	25	41	199.167	29	14.5607	98.4714
170304_04-19	4	pFRG/RTN	S100B	GFP	51	195	16
170304_04-20	4	pFRG/RTN	S100B	GFP	48	180	21
170304_04-21	4	pFRG/RTN	S100B	GFP	31	233	11
170304_04-22	4	pFRG/RTN	S100B	GFP	39	155	23
170304_04-23	4	pFRG/RTN	S100B	GFP	45	197	9
170304_04-24	4	pFRG/RTN	S100B	GFP	33	175	8	41.1667	189.167	14.6667	7.7533	98.5878
170304_05-1	1	pFRG/RTN	MAP2	GFP	107	213	0
170304_05-2	1	pFRG/RTN	MAP2	GFP	59	242	0
170304_05-3	1	pFRG/RTN	MAP2	GFP	109	191	0
170304_05-4	1	pFRG/RTN	MAP2	GFP	80	239	0
170304_05-5	1	pFRG/RTN	MAP2	GFP	64	159	0
170304_05-6	1	pFRG/RTN	MAP2	GFP	71	191	0	81.6667	205.833	0	0	0
170304_05-7	2	pFRG/RTN	MAP2	GFP	99	240	0
170304_05-8	2	pFRG/RTN	MAP2	GFP	55	172	0
170304_05-9	2	pFRG/RTN	MAP2	GFP	69	209	0
170304_05-10	2	pFRG/RTN	MAP2	GFP	116	171	0
170304_05-11	2	pFRG/RTN	MAP2	GFP	60	169	0
170304_05-12	2	pFRG/RTN	MAP2	GFP	81	193	0
170304_05-13	2	pFRG/RTN	MAP2	GFP	71	205	0	75.3333	186.5	0	0	0
170304_05-14	3	pFRG/RTN	MAP2	GFP	55	168	0
170304_05-15	3	pFRG/RTN	MAP2	GFP	97	202	0
170304_05-16	3	pFRG/RTN	MAP2	GFP	113	161	0
170304_05-17	3	pFRG/RTN	MAP2	GFP	87	198	0
170304_05-18	3	pFRG/RTN	MAP2	GFP	57	161	0
170304_05-19	3	pFRG/RTN	MAP2	GFP	107	211	0	86	183.5	0	0	0
170304_06-1	1	pFRG/RTN	Iba1	GFP	10	177	0
170304_06-2	1	pFRG/RTN	Iba1	GFP	24	177	0
170304_06-3	1	pFRG/RTN	Iba1	GFP	7	221	0
170304_06-4	1	pFRG/RTN	Iba1	GFP	6	188	0
170304_06-5	1	pFRG/RTN	Iba1	GFP	9	165	0
170304_06-6	1	pFRG/RTN	Iba1	GFP	14	243	0	11.6667	195.167	0	0	0
170304_06-7	2	pFRG/RTN	Iba1	GFP	22	187	0
170304_06-8	2	pFRG/RTN	Iba1	GFP	16	168	0
170304_06-9	2	pFRG/RTN	Iba1	GFP	19	232	0
170304_06-10	2	pFRG/RTN	Iba1	GFP	8	189	0
170304_06-11	2	pFRG/RTN	Iba1	GFP	10	215	0
170304_06-12	2	pFRG/RTN	Iba1	GFP	21	242	0
170304_06-13	2	pFRG/RTN	Iba1	GFP	7	241	0
170304_06-14	2	pFRG/RTN	Iba1	GFP	8	164	0	13.875	204.75	0	0	0
170411_01-1	1	preBötC	S100B	GFP	22	126	16
170411_01-2	1	preBötC	S100B	GFP	31	161	22
170411_01-3	1	preBötC	S100B	GFP	22	115	20
170411_01-4	1	preBötC	S100B	GFP	25	111	21
170411_01-5	1	preBötC	S100B	GFP	44	230	26
170411_01-6	1	preBötC	S100B	GFP	49	248	16	26	174.5	15.125	8.66762	94.1327
170411_01-7	2	preBötC	S100B	GFP	25	127	21
170411_01-8	2	preBötC	S100B	GFP	16	122	12
170411_01-9	2	preBötC	S100B	GFP	15	248	12
170411_01-10	2	preBötC	S100B	GFP	12	232	10
170411_01-11	2	preBötC	S100B	GFP	14	126	12
170411_01-12	2	preBötC	S100B	GFP	24	143	20	24.875	184.5	16.125	8.73984	64.8241
170411_01-13	3	preBötC	S100B	GFP	31	152	28
170411_01-14	3	preBötC	S100B	GFP	39	235	38
170411_01-15	3	preBötC	S100B	GFP	44	226	41
170411_01-16	3	preBötC	S100B	GFP	20	124	16
170411_01-17	3	preBötC	S100B	GFP	26	208	25
170411_01-18	3	preBötC	S100B	GFP	21	133	19	27.375	168.375	24.875	14.7736	90.8676
170411_01-19	4	preBötC	S100B	GFP	12	121	12
170411_01-20	4	preBötC	S100B	GFP	15	102	14
170411_01-21	4	preBötC	S100B	GFP	30	187	28
170411_01-22	4	preBötC	S100B	GFP	11	186	11
170411_01-23	4	preBötC	S100B	GFP	18	169	18
170411_01-24	4	preBötC	S100B	GFP	19	116	19	19	152.75	18.25	11.9476	96.0526
170411_02-1	1	preBötC	MAP2	GFP	103	165	0
170411_02-2	1	preBötC	MAP2	GFP	98	217	0
170411_02-3	1	preBötC	MAP2	GFP	88	181	0
170411_02-4	1	preBötC	MAP2	GFP	148	220	0
170411_02-5	1	preBötC	MAP2	GFP	86	175	0	104.6	191.6	0	0	0
170411_02-6	2	preBötC	MAP2	GFP	72	131	0
170411_02-7	2	preBötC	MAP2	GFP	89	209	0
170411_02-8	2	preBötC	MAP2	GFP	57	239	0
170411_02-9	2	preBötC	MAP2	GFP	104	133	0	80.5	178	0	0	0
170411_02-10	3	preBötC	MAP2	GFP	123	138	0
170411_02-11	3	preBötC	MAP2	GFP	82	150	0
170411_02-12	3	preBötC	MAP2	GFP	67	115	0
170411_02-13	3	preBötC	MAP2	GFP	73	168	0
170411_02-14	3	preBötC	MAP2	GFP	74	184	0
170411_02-15	3	preBötC	MAP2	GFP	76	182	0
170411_02-16	3	preBötC	MAP2	GFP	138	164	0	90.4286	157.286	0	0	0
170411_02-17	4	preBötC	MAP2	GFP	78	131	0
170411_02-18	4	preBötC	MAP2	GFP	85	198	0
170411_02-19	4	preBötC	MAP2	GFP	100	183	0
170411_02-20	4	preBötC	MAP2	GFP	70	125	0	83.25	159.25	0	0	0
170411_03-1	1	preBötC	NK1R	GFP	45	172	0
170411_03-2	1	preBötC	NK1R	GFP	26	212	0
170411_03-3	1	preBötC	NK1R	GFP	38	160	0
170411_03-4	1	preBötC	NK1R	GFP	32	192	0
170411_03-5	1	preBötC	NK1R	GFP	57	174	0
170411_03-6	1	preBötC	NK1R	GFP	43	119	0	40.1667	171.5	0	0	0
170411_03-7	2	preBötC	NK1R	GFP	33	149	0
170411_03-8	2	preBötC	NK1R	GFP	57	115	0
170411_03-9	2	preBötC	NK1R	GFP	44	206	0
170411_03-10	2	preBötC	NK1R	GFP	32	218	0
170411_03-11	2	preBötC	NK1R	GFP	21	205	0
170411_03-12	2	preBötC	NK1R	GFP	32	179	0	36.5	178.667	0	0	0
170411_03-13	3	preBötC	NK1R	GFP	38	134	0
170411_03-14	3	preBötC	NK1R	GFP	32	108	0
170411_03-15	3	preBötC	NK1R	GFP	39	134	0
170411_03-16	3	preBötC	NK1R	GFP	48	192	0
170411_03-17	3	preBötC	NK1R	GFP	59	166	0
170411_03-18	3	preBötC	NK1R	GFP	53	115	0
170411_03-19	3	preBötC	NK1R	GFP	41	214	0	44.2857	151.857	0	0	0
170411_03-20	4	preBötC	NK1R	GFP	21	192	0
170411_03-21	4	preBötC	NK1R	GFP	39	209	0
170411_03-22	4	preBötC	NK1R	GFP	48	139	0
170411_03-23	4	preBötC	NK1R	GFP	36	179	0
170411_03-24	4	preBötC	NK1R	GFP	49	236	0	38.6	181.25	0	0	0
170411_03-25	5	preBötC	NK1R	GFP	21	162	0
170411_03-26	5	preBötC	NK1R	GFP	27	238	0
170411_03-27	5	preBötC	NK1R	GFP	51	153	0
170411_03-28	5	preBötC	NK1R	GFP	51	220	0
170411_03-29	5	preBötC	NK1R	GFP	21	159	0
170411_03-30	5	preBötC	NK1R	GFP	56	166	0
170411_03-31	5	preBötC	NK1R	GFP	23	143	0	37.375	184.625	0	0	0
170411_04-1	1	preBötC	GFAP	GFP	54	155	54
170411_04-2	1	preBötC	GFAP	GFP	48	170	48
170411_04-3	1	preBötC	GFAP	GFP	43	198	43
170411_04-4	1	preBötC	GFAP	GFP	88	211	88
170411_04-5	1	preBötC	GFAP	GFP	52	204	52
170411_04-6	1	preBötC	GFAP	GFP	89	130	88
170411_04-7	1	preBötC	GFAP	GFP	80	240	80	64.8571	186.857	64.7143	34.633	99.7797
170411_04-8	2	preBötC	GFAP	GFP	87	208	80
170411_04-9	2	preBötC	GFAP	GFP	67	235	67
170411_04-10	2	preBötC	GFAP	GFP	59	236	58
170411_04-11	2	preBötC	GFAP	GFP	73	202	73
170411_04-12	2	preBötC	GFAP	GFP	41	173	41
170411_04-13	2	preBötC	GFAP	GFP	74	201	74	66.8333	209.167	65.5	31.3147	98.005
170411_04-14	3	preBötC	GFAP	GFP	57	138	57
170411_04-15	3	preBötC	GFAP	GFP	42	105	42
170411_04-16	3	preBötC	GFAP	GFP	38	165	38
170411_04-17	3	preBötC	GFAP	GFP	67	234	67	51	160.5	51	31.7757	100
170411_04-18	4	preBötC	GFAP	GFP	38	191	38
170411_04-19	4	preBötC	GFAP	GFP	48	160	48
170411_04-20	4	preBötC	GFAP	GFP	48	105	48
170411_04-21	4	preBötC	GFAP	GFP	56	153	56
170411_04-22	4	preBötC	GFAP	GFP	45	196	45
170411_04-23	4	preBötC	GFAP	GFP	47	245	47	47	175	47	26.8571	100
170411_04-24	5	preBötC	GFAP	GFP	61	138	61
170411_04-25	5	preBötC	GFAP	GFP	47	117	47
170411_04-26	5	preBötC	GFAP	GFP	78	233	78
170411_04-27	5	preBötC	GFAP	GFP	36	235	36
170411_04-28	5	preBötC	GFAP	GFP	85	151	85
170411_04-29	5	preBötC	GFAP	GFP	84	247	84
170411_04-30	5	preBötC	GFAP	GFP	86	154	86
170411_04-31	5	preBötC	GFAP	GFP	53	187	53	66.25	182.75	66.25	36.2517	100
170418_01-1	1	preBötC	Iba1	GFP	22	213	0
170418_01-2	1	preBötC	Iba1	GFP	21	235	0
170418_01-3	1	preBötC	Iba1	GFP	19	159	0
170418_01-4	1	preBötC	Iba1	GFP	15	168	0
170418_01-5	1	preBötC	Iba1	GFP	12	158	0
170418_01-6	1	preBötC	Iba1	GFP	32	160	0	20.1667	182.167	0	0	0
170418_01-7	2	preBötC	Iba1	GFP	29	127	0
170418_01-8	2	preBötC	Iba1	GFP	35	128	0
170418_01-9	2	preBötC	Iba1	GFP	11	184	0
170418_01-10	2	preBötC	Iba1	GFP	29	220	0
170418_01-11	2	preBötC	Iba1	GFP	27	188	0
170418_01-12	2	preBötC	Iba1	GFP	19	202	0	25	174.833	0	0	0
170418_01-13	3	preBötC	Iba1	GFP	11	149	0
170418_01-14	3	preBötC	Iba1	GFP	25	126	0
170418_01-15	3	preBötC	Iba1	GFP	24	165	0
170418_01-16	3	preBötC	Iba1	GFP	22	121	0
170418_01-17	3	preBötC	Iba1	GFP	39	154	0	24.2	143	0	0	0
170418_02-1	1	preBötC	Iba1	GFP	20	133	0
170418_02-2	1	preBötC	Iba1	GFP	13	169	0
170418_02-3	1	preBötC	Iba1	GFP	26	213	0
170418_02-4	1	preBötC	Iba1	GFP	11	234	0
170418_02-5	1	preBötC	Iba1	GFP	34	204	0
170418_02-6	1	preBötC	Iba1	GFP	11	236	0	19.1667	198.167	0	0	0
170418_02-7	2	preBötC	Iba1	GFP	27	196	0
170418_02-8	2	preBötC	Iba1	GFP	35	132	0
170418_02-9	2	preBötC	Iba1	GFP	31	164	0
170418_02-10	2	preBötC	Iba1	GFP	15	235	0
170418_02-11	2	preBötC	Iba1	GFP	38	177	0
170418_02-12	2	preBötC	Iba1	GFP	17	145	0	27.1667	174.833	0	0	0
170418_03-1	1	pFRG/RTN	Iba1	GFP	14	202	0
170418_03-2	1	pFRG/RTN	Iba1	GFP	12	136	0
170418_03-3	1	pFRG/RTN	Iba1	GFP	13	205	0
170418_03-4	1	pFRG/RTN	Iba1	GFP	25	194	0
170418_03-5	1	pFRG/RTN	Iba1	GFP	30	173	0
170418_03-6	1	pFRG/RTN	Iba1	GFP	31	184	0	20.8333	182.333	0	0	0
170418_03-7	2	pFRG/RTN	Iba1	GFP	37	208	0
170418_03-8	2	pFRG/RTN	Iba1	GFP	28	165	0
170418_03-9	2	pFRG/RTN	Iba1	GFP	14	195	0
170418_03-10	2	pFRG/RTN	Iba1	GFP	15	190	0
170418_03-11	2	pFRG/RTN	Iba1	GFP	22	196	0
170418_03-12	2	pFRG/RTN	Iba1	GFP	36	203	0
170418_03-13	2	pFRG/RTN	Iba1	GFP	35	191	0	26.7143	192.571	0	0	0
170418_04-1	1	pFRG/RTN	S100B	GFP	42	126	21
170418_04-2	1	pFRG/RTN	S100B	GFP	36	212	13
170418_04-3	1	pFRG/RTN	S100B	GFP	53	227	35
170418_04-4	1	pFRG/RTN	S100B	GFP	10	236	8
170418_04-5	1	pFRG/RTN	S100B	GFP	34	186	30
170418_04-6	1	pFRG/RTN	S100B	GFP	9	243	9	30.6667	205	19.3333	9.43089	97.4572
170418_04-7	2	pFRG/RTN	S100B	GFP	32	103	32
170418_04-8	2	pFRG/RTN	S100B	GFP	7	107	7
170418_04-9	2	pFRG/RTN	S100B	GFP	17	218	15
170418_04-10	2	pFRG/RTN	S100B	GFP	26	126	24
170418_04-11	2	pFRG/RTN	S100B	GFP	40	144	40
170418_04-12	2	pFRG/RTN	S100B	GFP	38	186	34
170418_04-13	2	pFRG/RTN	S100B	GFP	52	145	48	30.2857	147	28.5714	19.4363	94.3396
170418_04-14	3	pFRG/RTN	S100B	GFP	38	128	7
170418_04-15	3	pFRG/RTN	S100B	GFP	33	213	22
170418_04-16	3	pFRG/RTN	S100B	GFP	28	132	22
170418_04-17	3	pFRG/RTN	S100B	GFP	39	185	35
170418_04-18	3	pFRG/RTN	S100B	GFP	32	140	30
170418_04-19	3	pFRG/RTN	S100B	GFP	30	116	24
170418_04-20	3	pFRG/RTN	S100B	GFP	48	235	23
170418_04-21	3	pFRG/RTN	S100B	GFP	51	174	17	37.375	165.375	22.5	13.6054	85.1329
170418_04-22	4	pFRG/RTN	S100B	GFP	47	137	26
170418_04-23	4	pFRG/RTN	S100B	GFP	5	187	3
170418_04-24	4	pFRG/RTN	S100B	GFP	6	233	6
170418_04-25	4	pFRG/RTN	S100B	GFP	29	199	27
170418_04-26	4	pFRG/RTN	S100B	GFP	37	185	30
170418_04-27	4	pFRG/RTN	S100B	GFP	39	194	34
170418_04-28	4	pFRG/RTN	S100B	GFP	22	207	14
170418_04-29	4	pFRG/RTN	S100B	GFP	35	222	33
170418_04-30	4	pFRG/RTN	S100B	GFP	42	150	42	29.1111	190.444	23.8889	12.5438	97.4378

## Sheet: S100B part of slice
Image	Slice	Region	Antibody 1	Genetic stain	Stained cells 1	Stained cells 2	Double-labeled	Average stained cells 1	Average stained cells 2	Average Double	% of stain 2 double	% of stain 1 double				Average number of cells per slice		% of stain 2 double	% of stain 1 double			Number of slices
170309_05-1	1	preBötC	S100B	GFP	26	52	24									GFP	52.7744					NK1R	11
170309_05-2	1	preBötC	S100B	GFP	37	72	34									S100B	31.5708	43.8985	91.729			GFAP	11
170309_05-3	1	preBötC	S100B	GFP	28	38	25											10.949				MAP2	10
170309_05-4	1	preBötC	S100B	GFP	38	61	36															Iba1	11
170309_05-5	1	preBötC	S100B	GFP	30	51	27															S100B	13
170309_05-6	1	preBötC	S100B	GFP	24	40	22
170309_05-7	1	preBötC	S100B	GFP	31	34	28
170309_05-8	1	preBötC	S100B	GFP	42	80	39	32	53.5	29.375	54.9065	91.7969
170309_05-9	2	preBötC	S100B	GFP	47	92	42
170309_05-10	2	preBötC	S100B	GFP	38	71	37
170309_05-11	2	preBötC	S100B	GFP	49	88	42
170309_05-12	2	preBötC	S100B	GFP	36	65	36
170309_05-13	2	preBötC	S100B	GFP	48	51	32
170309_05-14	2	preBötC	S100B	GFP	19	40	18
170309_05-15	2	preBötC	S100B	GFP	49	90	49	40.8571	71	36.5714	9.47147	97.8713
170304_04-1	1	pFRG/RTN	S100B	GFP	27	51	25
170304_04-2	1	pFRG/RTN	S100B	GFP	39	66	36
170304_04-3	1	pFRG/RTN	S100B	GFP	28	43	22
170304_04-4	1	pFRG/RTN	S100B	GFP	22	42	21
170304_04-5	1	pFRG/RTN	S100B	GFP	16	43	16
170304_04-6	1	pFRG/RTN	S100B	GFP	10	23	9	23.6667	44.6667	21.5	48.1343	90.8451
170304_04-7	2	pFRG/RTN	S100B	GFP	46	81	41
170304_04-8	2	pFRG/RTN	S100B	GFP	37	66	30
170304_04-9	2	pFRG/RTN	S100B	GFP	41	51	32
170304_04-10	2	pFRG/RTN	S100B	GFP	37	54	31
170304_04-11	2	pFRG/RTN	S100B	GFP	51	71	44
170304_04-12	2	pFRG/RTN	S100B	GFP	36	92	31	41.3333	69.1667	34.8333	50.3614	93.2476
170304_04-13	3	pFRG/RTN	S100B	GFP	41	64	28
170304_04-14	3	pFRG/RTN	S100B	GFP	48	72	42
170304_04-15	3	pFRG/RTN	S100B	GFP	47	74	31
170304_04-16	3	pFRG/RTN	S100B	GFP	37	81	26
170304_04-17	3	pFRG/RTN	S100B	GFP	31	45	22
170304_04-18	3	pFRG/RTN	S100B	GFP	42	58	25	41	65.6667	29	44.1624	98.4714
170304_04-19	4	pFRG/RTN	S100B	GFP	51	35	16
170304_04-20	4	pFRG/RTN	S100B	GFP	48	48	21
170304_04-21	4	pFRG/RTN	S100B	GFP	31	27	11
170304_04-22	4	pFRG/RTN	S100B	GFP	39	47	23
170411_01-1	1	preBötC	S100B	GFP	22	45	16
170411_01-2	1	preBötC	S100B	GFP	31	41	22
170411_01-3	1	preBötC	S100B	GFP	22	28	20
170411_01-4	1	preBötC	S100B	GFP	25	32	21
170411_01-5	1	preBötC	S100B	GFP	44	49	26
170411_01-6	1	preBötC	S100B	GFP	49	49	16	32.875	39.75	19.375	48.7421	94.1327
170411_01-7	2	preBötC	S100B	GFP	25	46	21
170411_01-8	2	preBötC	S100B	GFP	16	25	12
170411_01-9	2	preBötC	S100B	GFP	15	28	12
170411_01-10	2	preBötC	S100B	GFP	12	26	10
170411_01-11	2	preBötC	S100B	GFP	14	23	12
170411_01-12	2	preBötC	S100B	GFP	24	41	20	24.875	35.875	16.125	44.9477	64.8241
170411_01-13	3	preBötC	S100B	GFP	31	57	28
170411_01-14	3	preBötC	S100B	GFP	39	76	38
170411_01-15	3	preBötC	S100B	GFP	44	82	41
170411_01-16	3	preBötC	S100B	GFP	20	33	16
170411_01-17	3	preBötC	S100B	GFP	26	54	25
170411_01-18	3	preBötC	S100B	GFP	21	41	19	27.375	50.875	24.875	48.8943	90.8676
170411_01-19	4	preBötC	S100B	GFP	12	25	12
170411_01-20	4	preBötC	S100B	GFP	15	30	14
170411_01-21	4	preBötC	S100B	GFP	30	57	28
170411_01-22	4	preBötC	S100B	GFP	11	27	11
170411_01-23	4	preBötC	S100B	GFP	18	40	18
170411_01-24	4	preBötC	S100B	GFP	19	40	19	19	39.25	18.25	46.4968	96.0526
170418_04-1	1	pFRG/RTN	S100B	GFP	42	44	21
170418_04-2	1	pFRG/RTN	S100B	GFP	36	28	13
170418_04-3	1	pFRG/RTN	S100B	GFP	53	77	35
170418_04-4	1	pFRG/RTN	S100B	GFP	10	21	8
170418_04-5	1	pFRG/RTN	S100B	GFP	34	68	30
170418_04-6	1	pFRG/RTN	S100B	GFP	9	20	9	30.6667	43	19.3333	44.9612	97.4572
170418_04-7	2	pFRG/RTN	S100B	GFP	32	66	32
170418_04-8	2	pFRG/RTN	S100B	GFP	7	31	7
170418_04-9	2	pFRG/RTN	S100B	GFP	17	44	15
170418_04-10	2	pFRG/RTN	S100B	GFP	26	30	24
170418_04-11	2	pFRG/RTN	S100B	GFP	40	88	40
170418_04-12	2	pFRG/RTN	S100B	GFP	38	75	34
170418_04-13	2	pFRG/RTN	S100B	GFP	52	103	48	30.2857	62.4286	28.5714	45.7666	94.3396
170418_04-14	3	pFRG/RTN	S100B	GFP	38	34	7
170418_04-15	3	pFRG/RTN	S100B	GFP	33	47	22
170418_04-16	3	pFRG/RTN	S100B	GFP	28	46	22
170418_04-17	3	pFRG/RTN	S100B	GFP	39	77	35
170418_04-18	3	pFRG/RTN	S100B	GFP	32	67	30
170418_04-19	3	pFRG/RTN	S100B	GFP	30	59	24
170418_04-20	3	pFRG/RTN	S100B	GFP	48	47	23
170418_04-21	3	pFRG/RTN	S100B	GFP	51	39	17	37.375	52	22.5	43.2692	85.1329
170418_04-22	4	pFRG/RTN	S100B	GFP	47	55	26
170418_04-23	4	pFRG/RTN	S100B	GFP	5	39	3
170418_04-24	4	pFRG/RTN	S100B	GFP	6	42	6
170418_04-25	4	pFRG/RTN	S100B	GFP	29	56	27
170418_04-26	4	pFRG/RTN	S100B	GFP	37	66	30
170418_04-27	4	pFRG/RTN	S100B	GFP	39	70	34
170418_04-28	4	pFRG/RTN	S100B	GFP	22	34	14
170418_04-29	4	pFRG/RTN	S100B	GFP	35	70	33
170418_04-30	4	pFRG/RTN	S100B	GFP	42	98	42	29.1111	58.8889	23.8889	40.566	97.4378

## Sheet: Forzen
Brain	Region	Antibody 1	Antibody 2	Stained cells 1	Stained cells 2	Double-labeled	Proportion			Average number of cells per slice
100715_01	preBötC	GFAP	MAP2	104	78	0	57.1429		preBötC	52.9275	3.84927
100715_02	preBötC	GFAP	MAP2	127	106	0	54.5064		pFRG/RTN	55.056	5.66743
100715_03	preBötC	GFAP	MAP2	132	128	0	50.7692
100715_04	preBötC	GFAP	MAP2	113	129	0	46.6942
100715_05	preBötC	GFAP	MAP2	144	131	0	52.3636
100715_06	preBötC	GFAP	MAP2	152	119	0	56.0886
100715_07	pFRG/RTN	GFAP	MAP2	163	152	0	51.746
100715_08	pFRG/RTN	GFAP	MAP2	154	96	0	61.6
100715_09	pFRG/RTN	GFAP	MAP2	128	119	0	51.8219
