# Supplementary material for: Astrocytes release prostaglandin E2 to modify respiratory network activity
Source: eLife. 2017 Oct 6;6:e29566. doi: 10.7554/eLife.29566 (PMC5648524; doi:10.7554/eLife.29566)
Supplement: Figure 2—source data 1. [file elife-29566-fig2-data1.xlsx]

## Sheet: preBötC
ID	Strain	Age	DIV	Lens	Region	MrgA1	Image interval	Duration (min)	Exposure time	Protocol	ROI	Measured	Analyzed	Fq 0-5 all cells	Fq 0-5 astrocytes	Fq 0-5 NONastrocytes	Fq 0-5 NK1R
161020_01-1	MrgA1	P3	7	20x1,0z	preBötC	YES	0,5s	20	100ms	Control 5 min, FLRF 5 min, Control 9 min, High potassium 1 min	x	x	5 min interval	9.39535	9.39535	74.2619	45.2171
161020_03-1	MrgA1	P3	7	20x1,0z	preBötC	YES	0,5s	20	100ms	Control 5 min, FLRF 5 min, Control 9 min, High potassium 1 min	x	x	5 min interval	10.9443	10.9443	53.779	24.3259
161020_03-2	MrgA1	P3	7	20x1,0z	preBötC	YES	0,5s	20	100ms	Control 5 min, FLRF 5 min, Control 9 min, High potassium 1 min	x	x	5 min interval	32.2372	32.2372	47.4039	39.1272
161021_02-1	MrgA1	P3	8	20x1,0z	preBötC	YES	0,5s	20	100ms	Control 5 min, FLRF 5 min, Control 9 min, High potassium 1 min	x	x	5 min interval	33.3157	33.3157	130.168	80.2478
161121_01-1	MrgA1	P3	7	20x1,0z	preBötC	YES	0,5s	2x10	100ms	Control 5 min, FLRF 5 min + Control 10 min	x	x	5 min interval	25.9311	25.9311	106.777	120.962
161121_04-1	MrgA1	P3	7	20x1,0z	preBötC	YES	0,5s	2x10	100ms	Control 5 min, FLRF 5 min + Control 10 min	x	x	5 min interval	29.1042	29.1042	63.6826	142.296
161124_02-1	MrgA1	P3	10	20x1,0z	preBötC	YES	0,5s	2x10	100ms	Control 5 min, FLRF 5 min + Control 10 min	x	x	5 min interval	21.0384	21.0384	89.3409	67.098
161124_03-1	MrgA1	P3	10	20x1,0z	preBötC	YES	0,5s	2x10	100ms	Control 5 min, FLRF 5 min + Control 10 min	x	x	5 min interval	12.9266	12.9266	64.0162	66.1296
161124_04-1	MrgA1	P3	10	20x1,0z	preBötC	YES	0,5s	2x10	100ms	Control 5 min, FLRF 5 min + Control 10 min	x	x	5 min interval	21.7796	21.7796	98.1664	64.6469
161124_05-1	MrgA1	P3	10	20x1,0z	preBötC	YES	0,5s	2x10	100ms	Control 5 min, FLRF 5 min + Control 10 min	x	x	5 min interval	9.89212	9.89212	49.9707	48.1079
161124_06-1	MrgA1	P3	10	20x1,0z	preBötC	YES	0,5s	2x10	100ms	Control 5 min, FLRF 5 min + Control 10 min	x	x	5 min interval	11.8295	11.8295	53.3285	51.7375
161128_01-1	MrgA1	P3	14	20x1,0z	preBötC	YES	0,5s	2x10	100ms	Control 5 min, FLRF 5 min + Control 10 min	x	x	5 min interval	9.22302	9.22302	61.5804	44.0725
161128_02-1	MrgA1	P3	14	20x1,0z	preBötC	YES	0,5s	2x10	100ms	Control 5 min, FLRF 5 min + Control 10 min	x	x	5 min interval	8.49894	8.49894	91.2522	39.8743
161128_03-1	MrgA1	P3	14	20x1,0z	preBötC	YES	0,5s	2x10	100ms	Control 5 min, FLRF 5 min + Control 10 min	x	x	5 min interval	10.2287	10.2287	39.939	57.5134
170124_03-1	MrgA1	P3	7	20x1,0z	preBötC	YES	0,5s	20	100ms	Control 5 min, FLRF 5 min, Control 9 min, High potassium 1 min	x	x	5 min interval	12.9156	12.9156	69.3758	78.5417
170124_05-1	MrgA1	P3	7	20x1,0z	preBötC	YES	0,5s	20	100ms	Control 5 min, FLRF 5 min, Control 9 min, High potassium 1 min	x	x	5 min interval	28.5163	28.5163	137.583	124.583
170202_01-1	MrgA1	P3	14	20x1,0z	preBötC	YES	0,5s	20	100ms	Control 5 min, FLRF 5 min, CO2 10 min	x	x	5 min interval	21.048	21.048	178.429	164.358
170202_02-1	MrgA1	P3	14	20x1,0z	preBötC	YES	0,5s	20	100ms	Control 5 min, FLRF 5 min, CO2 10 min	x	x	5 min interval	17.518	17.518	111.359	139.358
170202_03-1	MrgA1	P3	14	20x1,0z	preBötC	YES	0,5s	20	100ms	Control 5 min, FLRF 5 min, CO2 10 min	x	x	5 min interval	24.8428	24.8428	157.239	142.459
170202_04-1	MrgA1	P3	14	20x1,0z	preBötC	YES	0,5s	20	100ms	Control 5 min, FLRF 5 min, CO2 10 min	x	x	5 min interval	16.5988	16.5988	99.3459	102.346
170202_05-1	MrgA1	P3	14	20x1,0z	preBötC	YES	0,5s	20	100ms	Control 5 min, FLRF 5 min, CO2 10 min	x	x	5 min interval	25.2918	25.2918	103.459	96.5387
170202_06-1	MrgA1	P3	14	20x1,0z	preBötC	YES	0,5s	20	100ms	Control 5 min, FLRF 5 min, CO2 10 min	x	x	5 min interval	17.0399	17.0399	95.1298	91.3479
														18.6416	18.6416	89.7994	83.2222
														7.88513	7.88513	36.1479	39.6344
161020_02-1	MrgA1	P3	7	20x1,0z	preBötC	NO	0,5s	20	100ms	Control 5 min, FLRF 5 min, Control 4 min, High potassium 1 min	x	x	5 min interval	108.464	na	na	na
161021_01-1	MrgA1	P3	8	20x1,0z	preBötC	NO	0,5s	20	100ms	Control 5 min, FLRF 5 min, Control 4 min, High potassium 1 min	x	x	5 min interval	132.294	na	na	na
161025_01-1	C57bl6	P3	7	20x1,0z	preBötC	NO	0,5s	20	100ms	Control 5 min, FLRF 5 min, Control 4 min, High potassium 1 min	x	x	5 min interval	156.311	na	na	na
161025_02-1	C57bl6	P3	7	20x1,0z	preBötC	NO	0,5s	20	100ms	Control 5 min, FLRF 5 min, Control 4 min, High potassium 1 min	x	x	5 min interval	126.124	na	na	na
161025_03-1	C57bl6	P3	7	20x1,0z	preBötC	NO	0,5s	20	100ms	Control 5 min, FLRF 5 min, Control 4 min, High potassium 1 min	x	x	5 min interval	119.145	na	na	na
161025_04-1	C57bl6	P3	7	20x1,0z	preBötC	NO	0,5s	20	100ms	Control 5 min, FLRF 5 min, Control 4 min, High potassium 1 min	x	x	5 min interval	335.35	na	na	na
161028_01-1	MrgA1	P3	14	20x1,0z	preBötC	NO	0,5s	20	100ms	Control 5 min, FLRF 5 min, Control 4 min, High potassium 1 min	x	x	5 min interval	188.857	na	na	na
161028_02-1	MrgA1	P3	14	20x1,0z	preBötC	NO	0,5s	20	100ms	Control 5 min, FLRF 5 min, Control 4 min, High potassium 1 min	x	x	5 min interval	247.552	na	na	na
161028_03-1	MrgA1	P3	14	20x1,0z	preBötC	NO	0,5s	20	100ms	Control 5 min, FLRF 5 min, Control 4 min, High potassium 1 min	x	x	5 min interval	181.991	na	na	179.35
161031_05-1	C57bl6	P3	13	20x1,0z	preBötC	NO	0,5s	20	100ms	Control 5 min, FLRF 5 min, Control 4 min, High potassium 1 min	x	x	5 min interval	92.5087	na	na	87.5389
161031_06-1	C57bl6	P3	13	20x1,0z	preBötC	NO	0,5s	20	100ms	Control 5 min, FLRF 5 min, Control 4 min, High potassium 1 min	x	x	5 min interval	70.8738	na	na	78.6892
161121_02-1	MrgA1	P3	7	20x1,0z	preBötC	NO	0,5s	2x10	100ms	Control 5 min, FLRF 5 min + Control 10 min	x	x	5 min interval	104.943	na	na	68.4255
170124_01-1	MrgA1	P3	7	20x1,0z	preBötC	NO	0,5s	20	100ms	Control 5 min, FLRF 5 min, Control 9 min, High potassium 1 min	x	x	5 min interval	107.1	na	na	128.358
170124_02-1	MrgA1	P3	7	20x1,0z	preBötC	NO	0,5s	20	100ms	Control 5 min, FLRF 5 min, Control 9 min, High potassium 1 min	x	x	5 min interval	76.429	na	na	77.4596
170124_04-1	MrgA1	P3	7	20x1,0z	preBötC	NO	0,5s	20	100ms	Control 5 min, FLRF 5 min, Control 9 min, High potassium 1 min	x	x	5 min interval	62.359	na	na	58.5398
170131_01-1	MrgA1	P3	14	20x1,0z	preBötC	NO	0,5s	2x10	100ms	Control 5 min, FLRF 5 min + Control 10 min	x	x	5 min interval	102.589	na	na	100.341
170131_02-1	MrgA1	P3	14	20x1,0z	preBötC	NO	0,5s	2x10	100ms	Control 5 min, FLRF 5 min + Control 10 min	x	x	5 min interval	92.4881	na	na	96.2399
170131_03-1	MrgA1	P3	14	20x1,0z	preBötC	NO	0,5s	2x10	100ms	Control 5 min, FLRF 5 min + Control 10 min	x	x	5 min interval	89.5092	na	na	88.4587
170209_01-1	C57bl6	P3	9	20x1,0z	preBötC	NO	0,5s	20	100ms	Control 5 min, FLRF 5 min, CO2 10 min	x	x	5 min interval	128.129	na	na	105.214
170209_02-1	C57bl6	P3	9	20x1,0z	preBötC	NO	0,5s	20	100ms	Control 5 min, FLRF 5 min, CO2 10 min	x	x	5 min interval	114.024	na	na	138.649
170209_03-1	C57bl6	P3	9	20x1,0z	preBötC	NO	0,5s	20	100ms	Control 5 min, FLRF 5 min, CO2 10 min	x	x	5 min interval	72.5489	na	na	69.2497
170209_04-1	C57bl6	P3	9	20x1,0z	preBötC	NO	0,5s	20	100ms	Control 5 min, FLRF 5 min, CO2 10 min	x	x	5 min interval	78.2389	na	na	77.5872
170209_05-1	C57bl6	P3	9	20x1,0z	preBötC	NO	0,5s	20	100ms	Control 5 min, FLRF 5 min, CO2 10 min	x	x	5 min interval	67.2994	na	na	65.2398
														124.136	#DIV/0!	#DIV/0!	94.6227
														62.5976	#DIV/0!	#DIV/0!	31.4376
Excluded
161020_04-1	MrgA1	P3	7	20x1,0z	preBötC	YES	0,5s	20	100ms	Control 5 min, FLRF 5 min, Control 4 min, High potassium 1 min	x	x
161121_03-1	MrgA1	P3	7	20x1,0z	preBötC	YES	0,5s	2x10	100ms	Control 5 min, FLRF 5 min + Control 10 min	x	x
161124_01-1	MrgA1	P3	10	20x1,0z	preBötC	YES	0,5s	2x10	100ms	Control 5 min, FLRF 5 min + Control 10 min	x	x
161018_01-1	EP3RKO	P3	21	20x1,0z	preBötC	NO	0,5s	20	100ms	Control 5 min, FLRF 5 min, Control 9 min, High potassium 1 min	x	x	Need to be re-measured	522.318	na	na	na
161018_02-1	EP3RKO	P3	21	20x1,0z	preBötC	NO	0,5s	20	100ms	Control 5 min, FLRF 5 min, Control 9 min, High potassium 1 min	x	x	5 min interval	103.408	na	na	na
161018_03-1	EP3RKO	P3	21	20x1,0z	preBötC	NO	0,5s	20	100ms	Control 5 min, FLRF 5 min, Control 9 min, High potassium 1 min	x	x	5 min interval	79.2679	na	na	na
161018_04-1	EP3RKO	P3	21	20x1,0z	preBötC	NO	0,5s	20	100ms	Control 5 min, FLRF 5 min, Control 9 min, High potassium 1 min	x	x	5 min interval	222.858	na	na	na

## Sheet: Cell numbers ALL CELLS preBötC
																																	15	15	20	20	20	20	20	20	15	15	15	10+10	10+10	10+10	20	20	20
161018_01-1	161018_02-1	161018_03-1	161018_04-1	161020_01-1	161020_02-1	161020_03-1	161020_03-2	161020_04-1	161021_01-1	161021_02-1	161025_01-1	161025_02-1	161025_03-1	161025_04-1	161028_01-1	161028_02-1	161028_03-1	161031_05-1	161031_06-1	161121_01-1	161121_02-1	161121_03-1	161121_04-1	161124_01-1	161124_02-1	161124_03-1	161124_04-1	161124_05-1	161124_06-1	161128_01-1	161128_02-1	161128_03-1	170124_03-1	170124_05-1	170202_01-1	170202_02-1	170202_03-1	170202_04-1	170202_05-1	170202_06-1	170124_01-1	170124_02-1	170124_04-1	170131_01-1	170131_02-1	170131_03-1	170209_01-1	170209_02-1	170209_03-1
1	3	1	1	2	2	1	2		1	1	1	1	1	2	5	1	1	1	1	1	1		1		2	1	1	1	1	1	2	2	4	2	2	1	1	1	1	1	1	1	1	1	1	1	1	1	1
2	4	2	3	4	6	2	3		2	3	2	2	2	3	7	2	2	2	2	2	2		2		3	2	2	2	2	2	3	3	5	4	3	2	2	2	2	2	3	2	2	2	2	2	2	2	2
3	9	3	4	9	7	3	5		3	4	5	3	3	4	8	3	3	3	4	4	3		3		4	3	3	3	3	3	4	7	6	5	4	3	3	3	3	3	5	3	3	3	3	3	3	3	3
4	10	4	6	10	11	4	10		4	5	6	4	4	5	9	4	4	4	5	5	4		4		5	4	4	4	4	4	6	10	7	6	5	4	4	4	4	4	7	4	4	4	4	4	4	4	4
6	11	5	7	17	12	5	12		5	6	7	5	7	6	10	6	5	5	6	9	5		5		6	5	5	6	5	5	7	11	9	7	6	5	5	5	5	5	8	5	5	5	5	5	5	5	5
7	12	6	9	20	15	8	14		6	7	8	6	8	7	11	7	6	6	8	10	6		6		7	6	6	7	6	6	8	12	10	10	7	6	6	6	6	6	9	6	6	6	6	6	6	6	6
10	13	7	11	22	16	9	17		7	8	10	7	9	8	12	8	7	7	9	11	7		7		8	7	7	9	7	7	12	13	12	11	8	7	7	7	7	7	10	7	7	7	7	7	7	7	7
12	14	8	16	28	17	10	19		8	9	11	9	10	9	13	9	8	8	10	12	8		8		9	8	8	10	8	8	13	14	14	12	9	8	8	8	8	8	12	8	8	8	8	8	8	8	8
16	15	9	20	34	18	11	20		9	10	12	10	11	10	15	13	9	9	12	13	9		9		10	9	9	11	9	9	14	15	15	13	10	9	9	10	9	9	13	9	9	9	9	9	9	9	9
17	18	11	21	41	19	13	21		10	11	13	11	12	11	23	14	10	10	13	15	10		10		11	10	10	12	10	10	15	16	16	14	11	10	10	11	10	10	15	10	10	10	10	10	10	10	10
19	22	12	23	43	20	15	22		11	12	14	12	13	15	25	15	11	11	14	16	11		11		12	11	11	15	11	11	18	18	17	15	12	11	11	12	11	11	16	11	11	11	11	11	11	11	11
20	23	13	24	51	21	17	23		12	14	15	13	15	17	26	16	12	12	16	17	12		12		13	12	12	16	12	12	19	19	18	16	13	12	12	13	12	12	19	12	12	12	12	12	12	12	12
21	25	14	27	55	22	18	24		13	15	16	14	17	18	30	17	13	13	18	18	13		14		14	13	13	17	13	13	21	21	19	17	14	13	13	14	13	13	20	13	13	13	13	13	13	13	13
22	26	15	28	56	23	19	26		14	16	17	15	18	20	34	18	14	14	19	19	14		15		15	14	14	19	14	14	23	24	20	18	15	14	14	15	14	14	21	17	14	14	14	14	14	14	14
25	30	16	35	57	24	20	29		15	18	18	16	20	22	35	19	15	15	20	20	15		16		16	15	15	20	15	15	24	25	22	19	16	15	15	16	15	15	22	18	16	15	15	15	15	15	15
28	34	18	41	58	25	23	31		16	19	19	17	21	23	36	20	16	16	24	21	16		17		17	16	16	22	16	16	25	26	24	20	17	16	16	18	16	16	23	19	17	16	16	16	16	16	16
30	38	19	42	59	28	24	32		17	20	20	18		24	38	24	17	17	26	23	17		18		18	17	17	23	17	17	26	27	25	21	18	17	17	19	17	17	24	20	18	17	17	17		17	17
38	39	20	45	60	29	25	33		18	21	21	19		25	40	25	18	18	27	26	18		19		19	18	18	24	18	18	27	28	27	22	19	18	18	20	18	18	26	26	20	18	18	18		18	18
42	41	21	47	61	30	27	34		19	23	22	20		28	41	26	19	19	29	27	19		20		20	19	19	25	19	19	28	29	29	23	20	19	19	21	19	19	27	27	21	19	19	19		19	19
44	45	22	48	62	31	31	36		20	26	23	22		29	42	27	20	20	31	28	20		21		21	21	20	26	20	20	29	30	30	24	21	20	20	22	20	20	29	28	22	20	20	20		20	20
45	46	25	49	65	33	32	37		21	27	24	23		30	43	28	21	21	32	29	21		22		22	22	21	27	21	21	30	32	33	25	22	21	21	23	21	21	31	29	23	21		21		21	21
46	47	26	51	67	34	34	38		22	28	25	25		31	44	29	22	22	34	30	22		23		23	23	22	28	22	22	31	33	34	28	23	22	22	24	22	22	32	30	24	22		22		22	22
47	50	27	52	68	39	35	39		23	29	27	26		32	45	30	23	23	35	32	23		24		24	24	23	29	23	23	32	34	36	29	24	23	23	25	23	23	33	49	25	23		23		23	23
53	53	28	59	69	46	39	41		24		28	28		33	46	31	24	24	37	33	24		25		25	26	24	30	24	24	33	35	38	30	25	24	24	26	24	24	35	50	26	24		24		24	24
60	56	29	62	70	47	40	42		25		29	29		34	47	35	27	25	38	35	25		26		26	27	25	31	25	25	34	36	39	31	26	25	25	27	25	25	36	51	27	25		25		25	25
68	58	32	64	71	48	42	43		26		30	30		38	48	36	28	26	39	36	26		27		27	28	27	32	26	26	35	37	40	32	27	26	26	28	26	26	37	52	28	26		26		26	26
69		34	65	72	49	43	44		27		31	31		39	52	37	29	27	41	38	27		28		28	29	28	35	27	27	36	38	41	33	28	27	27	29	27	27	39	59	29	27		27		27	27
78		35	68	73	50	46	46		28		32	32		40	53	38	31	28	48	39	28		29		29	30	29	36	28	28	37	40	42	34	29	28	28	30	28	28	40	60	30	28		28		28	28
92		36	70	74	51	49	47		29		34	33		41	55	41	32	29	49	40	29		30		30	31	30	37	29	29	38	42	43	37	30	29		31	29	29	41	61	31	29		29		29	29
93		38	73	75	53	51	48		30		35	34		42	57	43	34	30	52	41	30		31		31	32	31	42	30	30	40	44	44	38	31	30		32	30	30	43	62	32	30		30		30	30
94		39	75	77	56	56	49		31		36	35		46	58	49	35	31	54	42	31		32		32	33	32	43	31	31	41	45	46	39	32	31		33	31	31	45	63	33	31		31		31	31
95		41	81	80	61	57	52		32		37	37		48	59	50	38	32	55	43	33		33		33	34	33	44		32	42	46	47	41	33	32		34	32	32	46	64	34	32		32		32	32
97		42	82	81	69	61	60		33		38	40		49	60	51	39	33	56	46	34		34		34	35	34	46		33	46	48	48	42	34	33		35	33	33	47	65	35	33		33		33	33
100		43	94	85	70	62	61		34		39	41		50	61	52	41	34	58	48	35		35		35	36	36	47		34	47	53	49	43	35	34		36	34	34	48	66	36	34		34		34	34
101		46	95	89	81	64	62		35		40	42		51	62	53	42	35	59	49	36		36		36	37	37	48		35	49	54	50	46	36	35		37	35	35	49	67	37	35		35		35	35
103		48	101	90	84	71	65		36		42	44		52	63	56	43	36	60	50	37		37		37	38	38	49		36	50		51	47	37	36		38	36	36	50	68	38	36		36		36	36
107		49	108	91	86	72	67		37		43	45		53	66	57	45	37	61	51	38		38		38	39	39	50		37	51		52	48	38	37		39	37	37	53	75	39			37		37	37
109		50	112	92	87	73	71		38		44	46		54	67	58	46	38	62	52	41		39		39	40	41	51		38	53		53	49	39	38		40	38	38	54	79	40			38		38	38
		52	130		88	75	72		39		45	47		56	68	59	47	39	65	53	42		40		40	41	42	52		39	54		54	51	40	39		41	39	39	55	80	41			39		39	39
		55	137		89	76	74		40		46	48		58	70	60		40	66	54	43		41		41	42	43	53		40	55		61	52	41	40		42	40	40	56	81	42			40		40	40
		56	139		90	78	75		41		47	49		60	71	61		41	68	55	44		42		42	43	45	54			56		62	53	42	41		43	41	41	58	82	43			41		41	41
		57	142		91	82	77		42		48	50		61	74	68		42	69	56	45		43		43	44	46	56			57		63	54	43	42		44	42	42	59	83	44			42		42	42
		58	147		93	83	79		43		49	51		62	75	69		43	71	57	46		44		44	45	47	57			59		64	55	44	43		45	43	43	60	84	46			43		43	43
		59	148		95	84	81		44		50	52		63	76	70		44	75	58	47		45		45	46	48	58			60		67	56	45	44		46	44	44	61	90	47			44		44	44
		60	149		99	86	82		45		51	53		64	77	71		45	77	59	48		46		46	47	49	59			61		71	57	46	45		47	45	45	62	91	48			45		45	45
		61	151		100	87	83		46		52	54		65	78	73		46	78	60	49		47		47	48	50	60			64		73	64	47	46		48	46	46	63	92	49			46		46	46
		62	154		101	88	84		47		53	55		66	79	74		47	82	62	50		48		48	49	51	63			65		74	65	48	47		49	47	47	64	93	51			47		47	47
		63			102	89	86		48		54	56		68	82	75		48	83	63	51		50		49	50	52	64			66		76	66	49	48		50	48	48	65	94	52			48		48	48
		65			103	91	95		49		55	57		69	83	76		49	89	64	52		51		50	51	53	65			67		78	67	50	49		51	49	49	68	95	53			49		49	49
		68			105	92	96		50		56	58		76	84	77		50	90	65	53		52		51	52	54	66			69		79	69	51	50		52	50	50	70	96	54			50		50	50
		71			107	93	97		51		57	59		77	87	78		51	91	66	54		53		52	54	55	67			70		80	70	52	51		53	51	51	73	97	55			51		51	51
		72			109	102	98		52		58	61		78	88	81		52	93	67	55		54		53	55	56	68			75		81	71	53	52		54	52	52	75	98	56			52		52	52
		74			112	105	99		53		59	62		82	89	82		53	94	68	56		62		54	57	57	70			76		82	73	54	53		55	53	53	76	99	57			53		53
		77			116	107	100		54		60	63		84	90	83		56	96	69	57		63		55	58	58	71			77		86	74	55	54		56	54	54	77	100	58			54		54
		78			123	109	103		55		61	64		85	91	84		57	97		58		64		56	59	59	72			82		87	75	56	55		57	55	55	78	103	59			55		55
		79			127	110	104		56		62	66		86	92	86		59	98		59		68		57	60	60	73			83		88	78	57	56		58	56	56	79	104	60			56		56
		81			132	111	105		57		63	68		87	97	87		60	102		60		69		58	61	61	74			84		89	79	58	57		59	57	57	81	105	61			57		57
		82			138	113	106		58		65	69		88	107	88		61	103		61		70		59	62	62	75			85		90	80	59	58		60	58	58	82	106	62			58		58
		84			140	114	107		59		67	70		89	108	90		62	105		62		71		60	63	63	76			86		96	81	60	59		61	59	59	84	107	63			59		59
		85			142	115	110		60		69	73		90	110	91		63	107		63		72		61	64	64	77			87		98	82	61	60		62	60	60	85	108	64			60
					143	116	111		61		70	74		91	112	92		65	108		64		74		62	65	65	78			92		99	84	62	61		64	61	61	88	109	65			61
					145	117	115		62		71	75		92	115	93		66	109		65		76		63	66	66	79			93		100	85	63	62		65	62	62	96	110	66			62
					146	120	117		63		73	76		93	116	94		68	110		66		78		64	67	67	80			94		101	86	64	63		68	63	63	97	111	67			63
					153	122	119		64		74	77		94	120	95		69	111		67		79		65	70	68	81			96		102	87	65	64		69	64	64	102	112	68			64
					155	125	120		66		75	78		96	129	96		70	112		68		80		66	71	69	83			97		103	88	66	65		72	65	65	103	116	69			65
					157	130	122		68		76	79		100	132	98		71	113		69		82		67	72	70	84			98		104	89	67	66		73	66	66	104	117	70			66
					158	132	128		69		77	81		103		99		72	114		70		83		68	73	71	87			100		107	90	68	67		78	67	67	105	118	71			67
						134	129		70		78	82		104		100		73	116		71				69	75	72	88			101		108	91	69	68		79	68	68	106	119	72			68
						136	131		71		79	84		108		101		74	118		72				70	76	74	91			102		109	92	70	69		80	69	69	108	120	73			69
						138	132		72		80	85		110		103		76	119		73				71	77	75	92			103		110	93	71	70		81	70	70	109	121	75			70
						143	133		73		81	86		111		104		77	120		74				72	78	76	95			104		113	95	72	71		82	71	71	111	122	76
						146	134		74		82	87		113		105		78	125		75				73	79	77	96			105		114	96	73	72		83	72	72	112	123	77
						149	136		75		83	88		114		106		79	126		76				74	80	78	99			106		119	97	74	73		84	73	73	115	124	78
						153	137		76		84	90		118		108		80	128		77				75	81	79	100			107		120	98		74		85	74	74	116	125	79
						165	139		77		85	92		119		109		82	131						76	83	80	103			108		121	99		75		86	75	75	117	126	80
						171	141		78		87	93		121		110		83	132						77	84	81	105			109		124	100		76		87	76	76	118	127	81
						173	146		79		88	97		122		111		84	133						78	85	82	106			111		131	101		77		88	77	77	119	128	82
						175	152		80		89	98		123		112			134						79	86	83	107			112		135	103		78		89	78	78	120	129	83
						179	155		82		90	99		124		113			135						80	87	84	108			117		136	104		79		90	79	79	123	132	84
						180	157		83		91	100		127		115			136							89	85	114			118		138	105				91	80	80	133	133	85
						183	159		84		92	101		134		117			137							90	87	115			119		141	106				92	81	81	135	134	86
						191			86		93	109		142		119			139							91	88	118			121		142	107				93	82	82	137	135	87
						193			87		94	112		143		120			140							92	89	119					143	108				94	83	83	141	136	88
									88		96	113		145		121			141							93	90						144	109				95	84	84	149	137	89
									89		97	114		147		122			144							94	91						145	110				96	85	85	150	138	90
									90		98	118		148		124			145							95	92						146	111				97	86	86	153	139	92
									91		99	119		150		126			147							96	93						148	116				98	87		154	151	93
									92		100	120		155		129			148							97	94						149	117				100	88		156	152	94
									93		102	121		157		130			149							98	95						150	118				101	89		160	153	95
									94		104	122		158		131			150							99	96						152	119				103	90		165	154	96
									95		105	123		159		135			151							100	97						155	120				105	91		169	155	97
									96		109	124		161		137			152							101	98						156	121				106	92
									97		111	125		164		138			155							104	100						160	122				107	93
									98		113	126		167		140			158							105	101						161	123				108	94
									99		114	127		168		142			160							106	102						165	124				109	95
									100		115	128				143			161							108	103						169	126				110	96
									101		117	129				144			162							109	104						170	131				111	97
									102		119	130				145			164							110	105						171	132				113	98
									103		120	131				147			165							111	106						172	133				114	99
									106		122	132				151			167							113	107						173	134				115	100
									107		123	134				152			169							115	108						174	135				116	101
									108		128	135				154			170							116	109						185	136				117	102
									109		129	136				157			171							117	110						186	137				119	103
									110		130	137				160			172							118	111						187	140				120	104
									111		133	140				163			173							119	112						188	141				121	105
									112		134	141				165			174							120	113						189	142				122	106
											135	142				166			175							121	114						190	143				123	107
											136	143				168			176							122	115						191	144				124	108
											138	144				170			178							123	116						192	145				125	109
											139	145				171			181							124	117						193	146				126	110
											140	146				172			183							126	118						196	147				127	111
											141	147				173			184							127	119						200	148				129	112
											143	148				174			185							128	120						206	149				130	113
											147	149				176			186							129	121						207	153				131	114
											148	151				177			188							131	122						215	154				132	115
											154	152							189							132	123						216	155				133	116
											155	154							192							134	124						217	156				134	117
											157	155							193							135	125						218	157				135	118
											159	156							195							136	126						224	158				136	119
											160	157							197							137	127						228	161				137	120
											161	158							199							139	128							162				138	121
											164	159							201							141	129							163				139	122
											171	162							204							142	130							164				140	123
											172	164							206							143	131							165				141	124
											177	165							208							144	132							168				142
											181	166							209							145	133							169				145
											182	167							210							146	134							170				146
											183	168							211							148	135							171				147
											189	172							216							150	138							172				148
											193	177							221							151	139							173				149
												178							222							152	141							174				152
												179							223							153	142							175				153
												183							224							157	143							184				155
												184							225							158	144							185
												185							227							159	146							186
												186							228							160	147							187
												188							229							161	148							188
												191							230							162	150							189
												192							231							163	151							190
												193							232							164	152							191
												194							233							165	153							192
												195							234							166	155							193
												197							236							167	156							194
												198							239							168	157							195
												199							241							169	158							196
												201							244							172	159							200
												202							246							173	160							201
												203							247							174	161							202
												204							248							175	162							203
												205							253							177	163
												206							258							178	164
												207							260							182	165
												209							263							183	166
												210							265							184	167
												212							266							185	168
												216							273							186	169
												217							277							187	170
												222							279							189	171
												223							280							191	172
												224							281							193	173
												227							282								174
												228							283								175
												229							289								180
												230							292								181
												234							293								182
												236							294								183
												237							296								184
												238							297								185
												242							298								186
												243							302								187
												244							305								188
																			308								189
																			310								190
																			314								191
																			317								193
																			321								194
																			324								195
																			325								196
																			327								197
																			329								198
																			330								200
																			332								201
																			334								202
																			338								204
																			340								205
																			343								206
																			345								207
																			347								208
																			350								209
																			358								210
																			360								211
																			364								212
																			365								213
																			366								214
																											215
																											216
																											217
																											218
																											219
																											220
																											221
																											223
																											224
																											225
																											226
																											228
																											229
																											230
																											231
																											233
																											235
																											236
																											237
																											238
																											239
																											241
																											244
																											245
																											246
																											250
																											251
																											252
																											253
																											254
																											255
																											256
																											257
																											258
																											259
																											260
																											261
																											262
																											263
																											264
																											265
																											266
																											267
																											268
																											269
																											270
																											271
																											272
																											273
																											274
																											275
																											276
																											277
																											281
																											282
																											285
																											288
																	39	77	194	54	74	0	67	0	79	160	251	83	31	40	82	35
																														40	82	35
[truncated: 2 more columns]

## Sheet: Cell numbers ASTROCYTES preBötC
ID	161018_01-1	161018_02-1	161018_03-1	161018_04-1	161020_01-1	161020_02-1	161020_03-1	161020_03-2	161020_04-1	161021_01-1	161021_02-1	161025_01-1	161025_02-1	161025_03-1	161025_04-1	161028_01-1	161028_02-1	161028_03-1	161031_05-1	161031_06-1	161121_01-1	161121_02-1	161121_03-1	161121_04-1	161124_02-1	161124_03-1	161124_04-1	161124_05-1	161124_06-1	161128_01-1	161128_02-1	161128_03-1	170124_03-1	170124_05-1	170202_01-1	170202_02-1	170202_03-1	170202_04-1	170202_05-1	170202_06-1
					2		1	3			2										68			38	78	191	286	119	31	36	84	54	207	203	65	70	27	155	106	86
					10		4	8			9										67			31	77	190	285	117	30	35	83	40	200	201	48	69	16	133	105	74
					55		5	21			18										66			29	76	189	282	116	29	33	55	38	172	200	43	67	14	132	101	73
					58		8	25			26										65			26	73	184	280	113	28	31	53	36	161	196	41	66	10	90	98	68
					60		31	33													64			24	65	182	279	111	26	25	35	35	136	195	27	65	8	87	96	55
					71		32	36													62			4	64	181	278	110	24	18	33	33	120	194	20	55	5	84	92	51
					73		41	38													59			2	59	180	277	109	19	16	29	27	104	192	16	54	3	58	74	49
					80		43	45													58				57	171	276	108	18	8	26	26	101	191	9	51		57	45	48
					85		44	47													57				53	166	275	107	16	5	25	21	90	190		50		55	38	45
							46	50													56				51	165	273	106	15	2	21	12	87	189		22		51	35	41
							58	64													55				50	154	269	105	14		15	11	64	188		20		50	28	39
							67	66													54				48	153	266	104	12		14	2	61	187		18		49	24	35
		18.5731	35.6862				74	68													52				47	145	264	102	10		12		51	186		12		46	16	33
							78	70													51				44	140	263	100	8		7		42	173		9		42	15	32
							128	71													50				42	139	261	99	3		3		41	172		2		41	10	30
							141	78													49				41	136	260	98	1				38	171				40	9	28
							156	85													48				39	123	259	97					33	165				35	8	27
								88													46				34	117	257	96					20	163				33	5	26
								89													42				33	108	256	94					16	162				28	4	24
								101													39				31	106	254	93					15	146				24	3	16
								108													32				29	105	252	91					14	144				23	1	11
								112													30				28	102	251	90					5	142				11
								124													29				19	100	248	89						141				7
								125													26				16	99	247	87						124				2
								126													23				14	97	245	86						123
								127													19				13	93	244	82						122
								129													18				12	92	242	81						111
								130													17				10	90	237	80						110
								131													15				8	88	236	77						107
								137													13				7	87	234	74						106
								138													12				6	85	232	73						105
								140													10				5	82	231	66						104
								142													9				3	80	226	64						95
								144													5					74	225	62						93
								145													4					72	224	61						91
								149													1					63	220	60						90
								153																		58	219	59						89
								158																		54	217	57						86
																										49	213	56						85
																										31	210	55						75
																										18	209	54						74
																										15	208	53						73
																										13	207	52						71
																										8	206	50						70
																										3	205	49						69
																											204	48						67
																											203	46						66
																											200	45						31
																											195	44						30
																											193	43						29
																											192	42						25
																											188	41						24
																											184	39						23
																											181	38						22
																											179	37						11
																											171	33						10
																											169	32
																											166	30
																											165	29
																											162	26
																											157	24
																											156	23
																											153	22
																											151	21
																											150	19
																											149	14
																											148	12
																											147	8
																											146	2
																											143
																											142
																											141
																											139
																											138
																											136
																											135
																											129
																											127
																											125
																											124
																											117
																											116
																											114
																											112
																											110
																											109
																											107
																											106
																											104
																											103
																											102
																											101
																											100
																											97
																											96
																											95
																											94
																											93
																											92
																											91
																											90
																											88
																											87
																											82
																											81
																											79
																											78
																											77
																											69
																											68
																											67
																											55
																											53
																											51
																											50
																											48
																											45
																											44
																											41
																											39
																											37
																											34
																											28
																											27
																											21
																											20
																											19
																											17
																											10
																											6
																											5
																											1
																														10	15	12
																									33	45	132	69	16		16	30
																									15	33	45	132	69		63

## Sheet: Cell numbers NON-ASTRO preBötC
161018_01-1	161018_02-1	161018_03-1	161018_04-1	161020_01-1	161020_02-1	161020_03-1	161020_03-2	161020_04-1	161021_01-1	161021_02-1	161025_01-1	161025_02-1	161025_03-1	161025_04-1	161028_01-1	161028_02-1	161028_03-1	161031_05-1	161031_06-1	161121_01-1	161121_02-1	161121_03-1	161121_04-1	161124_02-1	161124_03-1	161124_04-1	161124_05-1	161124_06-1	161128_01-1	161128_02-1	161128_03-1	170124_03-1	170124_05-1	170202_01-1	170202_02-1	170202_03-1	170202_04-1	170202_05-1	170202_06-1
				4		2	2			1										61			79	2	1	2	1	2	1	2	3	4	2	2	1	1	1	2	1
				9		3	5			3										47			73	4	2	3	3	4	3	4	7	6	4	3	3	2	3	6	2
				17		9	10			4										44			70	9	4	4	4	5	4	6	10	7	5	4	4	4	4	7	3
				20		10	12			5										34			67	11	5	7	6	6	6	8	13	9	6	5	5	6	5	11	4
				22		11	14			6										31			66	15	6	8	7	7	7	13	14	10	7	6	6	7	6	12	5
				28		13	17			7										25			62	17	7	9	9	9	9	18	15	12	12	7	7	9	8	13	6
				34		15	19			8										24			60	18	9	11	10	11	10	19	16	17	13	8	8	11	10	14	7
				41		17	20			10										22			49	20	10	12	11	13	11	23	18	18	14	10	10	12	12	17	8
				43		18	22			11										14				21	11	13	15	17	12	24	19	19	15	11	11	13	13	18	9
				51		19	23			12										8				22	12	14	16	20	13	27	24	22	16	12	13	15	14	19	10
				56		20	24			14										3				23	14	15	17	21	14	28	25	24	17	13	14	17	15	20	12
				57		23	26			15														24	16	16	20	22	15	30	28	25	18	14	15	18	16	21	13
				59		24	29			16														25	17	18	25	23	17	31	29	27	19	15	16	19	18	22	14
				61		25	31			19														26	19	22	27	25	19	32	30	29	20	17	17	20	19	23	15
				62		27	32			20														27	21	23	28	27	20	34	32	30	21	18	19	21	20	25	17
				65		34	34			21														30	22	24	31		21	36	34	34	28	19	21	22	21	26	18
				67		35	37			23														32	23	25	35		22	37	37	36	32	21	23	23	22	27	19
				68		39	39			27														35	24	29	36		23	38	42	39	33	22	24	24	25	29	20
				69		40	41			28														36	26	30	47		24	40	44	40	34	23	25	25	26	30	21
				70		42	42			29														37	27	31	51		26	41	45	43	37	24	26	26	27	31	22
				72		49	43																	38	28	32	58		27	42	46	44	38	25	27	28	29	32	23
				74		51	44																	40	29	33	63		28	46	48	46	39	26	28		30	33	25
				75		56	46																	43	30	36	65		29	47	53	47	41	28	29		31	34	29
				77		57	48																	45	32	38	67		30	49		48	42	29	30		32	36	31
				81		61	49																	46	33	42	68		32	50		49	43	30	31		34	37	34
				89		62	52																	49	34	43	70		34	51		50	46	31	32		36	39	36
				90		64	60																	52	35	46	71		37	54		52	47	32	33		37	40	37
				91		71	61																	54	36	47	72		38	56		53	48	33	34		38	41	38
				92		72	62																	55	37	49	75		39	57		54	49	34	35		39	42	40
						73	65																	56	38	52	76		40	59		62	51	35	36		43	43	42
						75	67																	58	39	54	78			60		63	52	36	37		44	44	43
						76	72																	60	40	56	79			61		67	53	37	38		45	46	44
						82	74																	61	41	57	83			64		71	54	38	39		47	47	46
						83	75																	62	42	58	84			65		73	55	39	40		48	48	47
						84	77																	63	43	59	88			66		74	56	40	41		52	49	50
						86	79																	66	44	60	92			67		76	57	42	42		53	50	52
						87	81																	67	45	61	95			69		78	64	44	43		54	51	53
						88	82																	68	46	62	103			70		79	65	45	44		56	52	54
						89	83																	69	47	63	114			75		80	78	46	45		59	53	56
						91	84																	70	48	64	115			76		81	79	47	46		60	54	57
						92	86																	71	50	65	118			77		82	80	49	47		61	55	58
						93	95																	72	51	66				82		86	81	50	48		62	56	59
						102	96																	74	52	70				85		88	82	51	49		64	57	60
						105	97																	75	55	71				86		89	84	52	52		65	58	61
						107	98																	79	57	72				87		96	87	53	53		68	59	62
						109	99																	80	59	74				92		98	88	54	56		69	60	63
						110	100																		60	75				93		99	92	55	57		72	61	64
						111	103																		61	76				94		100	96	56	58		73	62	65
						113	104																		62	80				96		102	97	57	59		78	63	66
						114	105																		64	83				97		103	98	58	60		79	64	67
						115	106												2						65	84				98		107	99	59	61		80	65	69
						116	107												8						66	85				100		108	100	60	62		81	66	70
						117	110												10						67	89				101		109	101	61	63		82	67	71
						120	111												11						70	98				102		110	103	62	64		83	68	72
						122	115												19						71	105				103		113	108	63	68		85	69	75
						125	117												24						73	108				104		114	109	64	71		86	70	76
						130	119												26						75	111				105		119	116	66	72		88	71	77
						132	120												38						76	113				106		121	117	67	73		89	72	78
						134	122												40						77	115				107		124	118	68	74		91	73	79
						136	128												44						78	118				108		131	119	69	75		92	75	80
						138	132												47						79	119				109		135	120	70	76		93	76	81
						143	133												50						81	120				111		138	121	71	77		94	77	82
						146	134												55						83	121				112		141	126	72	78		95	78	83
						149	136												58						84	122				117		142	131	73	79		96	79	84
						153	139												60						86	123				118		143	132	74			97	80	85
						165	141												66						89	126				119		144	133				98	81
						171	146												71						91	128				121		145	134				100	82
						173	152												71						94	130						146	135				101	83
						175	155												73						95	131						148	136				103	84
						179	157												79						96	132						149	137				105	85
						180	159												80						98	133						150	140				106	86
						183													85						101	134						152	143				107	87
						191																			104	144						155	145				108	88
						193																			109	152						156	147				109	89
																									110	155						160	148				110	90
																									111	158						165	149				111	91
																									113	159						169	153				113	93
																									115	160						170	154				114	94
																									116	161						171	155				115	95
																									118	163						173	156				116	97
																									119	164						174	157				117	99
																									120	167						185	158				119	100
																									121	168						186	161				120	102
																									122	170						187	164				121	103
																									124	172						188	168				122	104
																									126	173						189	169				123	107
																									127	174						190	170				124	108
																									128	175						191	174				125	109
																									129	180						192	175				126	110
																									131	182						193	184				127	111
																									132	183						196	185				129	112
																									134	185						206	193				130	113
																									135	186						215	202				131	114
																									137	187						216					134	115
																									141	189						217					135	116
																									142	190						218					136	117
																									143	191						224					137	118
																									144	194						228					138	119
																									146	196											139	120
																									148	197											140	121
																									150	198											141	122
																									151	201											142	123
																									152	202											145	124
																									157	211											146
																									158	212											147
																									159	214											148
																									160	215											149
																									161	216											152
																									162	218											153
																									163	221
																									164	223
																									167	228
																									168	229
																									169	230
																									172	233
																									173	235
																									174	238
																									175	239
																									177	241
																									178	250
																									183	253
																									185	255
																									186	258
																									187	262
																									193	265
																										267
																										268
																										270
																										271
																										272
																										274
																										281
																										288

## Sheet: Cell numbers NK1R preBötC
ID	161018_01-1	161018_02-1	161018_03-1	161018_04-1	161020_01-1	161020_02-1	161020_03-1	161020_03-2	161020_04-1	161021_01-1	161021_02-1	161025_01-1	161025_02-1	161025_03-1	161025_04-1	161028_01-1	161028_02-1	161028_03-1	161031_05-1	161031_06-1	161121_01-1	161121_02-1	161121_03-1	161121_04-1	161124_02-1	161124_03-1	161124_04-1	161124_05-1	161124_06-1	161128_01-1	161128_02-1	161128_03-1	170124_01-1	170124_02-1	170124_03-1	170124_04-1	170124_05-1	170202_01-1	170202_02-1	170202_03-1	170202_04-1	170202_05-1	170202_06-1	170131_01-1	170131_02-1	170131_03-1	170209_01-1	170209_02-1	170209_03-1
																					65	52		45	71	187	98	118	25	40	121	53	169	116	141	72	119	66	78	26	153	120	86	29	1	70	2	3	12
																					64	51		42	66	174	85	114	22	39	118	42	141	93	63	59	120	56	77	24	149	119	83	33	2	66	4	4	14
																					41	43		32	63	173	84	79	17	38	109	30	135	91	53	47	149	51	73	22	132	105	82	12	5	65	5	17	15
																					33	29		29	62	169	83	72	13	26	77	29	120	62	52	9	201	40	71	17	123	92	80		7	64	7	19	16
																					19	22		26	52	160	80	71	5	22	64	28	119		44		184	34	64	15	116	91	70		12	62	9	20	20
																					15	8		24	32	158	74	68	4	15	60	3	118		34		175		63	14	110	90	65		13	58	11	34	34
																								11	25	152	71	47			51		116		22		164		61	4	106	81	39		18	56			37
																								7	21	148	70	36			49		112				187		60	3	105	32	22		19	54
																									18	142	66	35			19		111						48	1	101	27	19		20	53
																										131	63	17			13		105						33		89	7	18			47
																										127	62	16			2		104						29		85	6	16			44
																										124	61	15					102						27		73		6			43
																										109	59	11					77						19		72		2			38
																										89	58	4					76						12		64					37
																										81	25	3					64						9		48					36
																										75	12						54						2		46					34
																										73							50						1		40					23
																										66							29								39					20
																										65							23								35					19
																										64							16								27					18
																										51							15								21					13
																										48							13								3					6
																										47							10													4
																										46							5													3
																										41																				2
																										30
																										29
																										28
																										21
																										12
																										5
																									9	31	16	15	6	6	11	6	24	4	7	4	8	5	17	9	22	11	13	3	9	25	6	6	7
																									9	31	16	15	6	6	11	6	24	4	7	4	8	5	17	9	22	11	13	3	9	25	6	6	7
[truncated: 2 more columns]

## Sheet: Cell sorting
96	82	9.329	72.500	25.833	96	96
87	35	80.143	123.045	100.591	87	87
68	123	95.366	422.304	209.348	68	68
67	51	75	266.500	274.633	67	67
29	65	145.154	263.554	269.392	29	29
9	43	255	314.663	449.500	9	9
3	32	255	312.344	460.312	3	3
1	160	0	241.838	499.844	1	0
2	36	0	73.361	463.611	2	0
4	45	0	416.033	455.589	4	0
5	53	0	288.142	452.028	5	0
6	37	0	382.878	453.743	6	0
7	49	0	46.378	450.969	7	0
8	37	0	278.986	450.689	8	0
10	100	0	289.980	415.140	10	0
11	42	0	251.643	408.452	11	0
12	46	0	375.196	392.370	12	0
13	38	0	267.605	382.921	13	0
14	34	0	322.618	378.382	14	0
15	54	0	26.093	370.278	15	0
16	59	0	370.754	369.771	16	0
17	141	0	466.465	356.018	17	0
18	55	0	430.936	351.100	18	0
19	147	0	237.486	327.786	19	0
20	52	0	397.019	314.692	20	0
21	32	0	458.969	302.844	21	0
22	39	0	34.987	295.346	22	0
23	32	0	486.562	290.688	23	0
24	45	0	418.522	286.678	24	0
25	129	0	478.585	277.283	25	0
26	31	0	14.565	278.855	26	0
27	54	0	284.685	276.852	27	0
28	47	0	418.564	277.011	28	0
30	46	0	388.696	266.717	30	0
31	44	0	292.864	259.636	31	0
32	59	0	225.653	259.042	32	0
33	42	0	374.262	240.167	33	0
34	85	0	62.500	235.312	34	0
35	67	0	364.022	230.187	35	0
36	46	0	441.891	223.804	36	0
37	51	0	409.167	212.578	37	0
38	70	0	493.214	209.757	38	0
39	77	0	52.435	203.760	39	0
40	47	0	365.011	202.862	40	0
41	167	0	246.141	183.710	41	0
42	68	0	348.779	185.515	42	0
43	41	0	125.476	176.866	43	0
44	79	0	381.108	164.082	44	0
45	33	0	425.712	163.076	45	0
46	31	0	448.855	163.984	46	0
47	60	0	29.850	154.700	47	0
48	182	0	236.027	148.093	48	0
49	32	0	342.406	147.312	49	0
50	76	0	366.105	129.882	50	0
51	75	0	133.380	125.553	51	0
52	119	0	375.836	121.903	52	0
53	79	0	350.019	115.335	53	0
54	250	0	281.880	90.520	54	0
55	58	0	319.534	97.034	55	0
56	38	0	469.895	73.263	56	0
57	47	0	13.628	70.266	57	0
58	49	0	397.214	45.888	58	0
59	37	0	204.662	32.203	59	0
60	58	0	327.621	16.345	60	0
61	103	0	195.481	8.694	61	0
62	84	0	289.524	404.226	62	0
63	35	0	298.329	402.529	63	0
64	63	0	231.500	385.944	64	0
65	30	0	188.767	370	65	0
66	36	0	194.444	367.472	66	0
69	55	0	444.318	179.300	69	0
70	40	0	353.200	177.625	70	0
71	30	0	314.733	113.800	71	0
72	31	0	328.468	354.984	72	0
73	71	0	307.430	343.923	73	0
74	31	0	311.758	338.661	74	0
75	67	0	303.993	258.470	75	0
76	60	0	481.117	232.400	76	0
77	232	0	43.397	173.211	77	0
78	38	0	281.763	157.579	78	0
79	51	0	25.029	38.029	79	0
80	36	0	433.778	35.278	80	0
81	32	0	478.875	250.062	81	0
82	190	0	479.458	489.974	82	0
83	54	0	453.130	297.426	83	0
84	55	0	296.918	190.100	84	0
85	56	0	288.732	186.625	85	0
86	109	0	360.133	108.060	86	0
88	63	0	347.532	94.960	88	0
89	50	0	34.620	32.660	89	0
90	55	0	29.773	20.936	90	0
91	146	0	37.048	255.466	91	0
92	41	0	45.695	247.622	92	0
93	32	0	501.531	114.906	93	0
94	78	0	506.115	104.654	94	0
95	80	0	499.188	96.212	95	0
					0	0
					0	0
					0	0
					0	0
					0	0
					0	0
					0	0
					0	0
					0	0
					0	0
					0	0
					0	0
					0	0
					0	0
					0	0
					0	0
					0	0
					0	0
					0	0
					0	0
					0	0
					0	0
					0	0
					0	0
					0	0
					0	0
					0	0
					0	0
					0	0
					0	0
					0	0
					0	0
					0	0
					0	0
					0	0
					0	0
					0	0
					0	0
					0	0
					0	0
					0	0
					0	0
					0	0
					0	0
					0	0
					0	0
					0	0
					0	0
					0	0
					0	0
					0	0
					0	0
					0	0
					0	0
					0	0
					0	0
					0	0
					0	0
					0	0
					0	0
					0	0
					0	0
					0	0
					0	0
					0	0
					0	0
					0	0
					0	0
					0	0
					0	0
					0	0
					0	0
					0	0
					0	0
					0	0
					0	0
					0	0
					0	0
					0	0
					0	0
					0	0
					0	0
					0	0
					0	0
					0	0
					0	0
					0	0
					0	0
					0	0
					0	0
					0	0
					0	0
					0	0
					0	0
					0	0
					0	0
					0	0
					0	0
					0	0
					0	0
					0	0
					0	0
					0	0
					0	0
					0	0
					0	0
					0	0
					0	0
					0	0
					0	0
					0	0
					0	0
					0	0
					0	0
					0	0
					0	0
					0	0
					0	0
					0	0
					0	0
					0	0
					0	0
					0	0
					0	0
					0	0
					0	0
					0	0
					0	0
					0	0
					0	0
					0	0
					0	0
					0	0
					0	0
					0	0
					0	0
					0	0
					0	0
					0	0
					0	0
					0	0
					0	0
					0	0
					0	0
					0	0
					0	0
					0	0
					0	0
					0	0
					0	0
					0	0
					0	0
					0	0
					0	0
					0	0
					0	0
					0	0
					0	0
					0	0
					0	0
					0	0
					0	0
					0	0
					0	0
					0	0
					0	0
					0	0
					0	0
					0	0
					0	0
					0	0
					0	0
					0	0
					0	0
					0	0
					0	0
					0	0
					0	0
					0	0
					0	0
					0	0
					0	0
					0	0
					0	0
					0	0
					0	0
					0	0
					0	0
					0	0
					0	0
					0	0
					0	0
					0	0
					0	0
					0	0
					0	0
					0	0
					0	0
					0	0
					0	0
					0	0
					0	0
					0	0
					0	0
					0	0
					0	0
					0	0
					0	0
					0	0
					0	0
					0	0
					0	0
					0	0
					0	0
					0	0
					0	0
					0	0
					0	0
					0	0
					0	0
					0	0
					0	0
					0	0
					0	0
					0	0
					0	0
					0	0
					0	0
					0	0
					0	0
					0	0
					0	0
					0	0
					0	0
					0	0
					0	0
					0	0
					0	0
					0	0
					0	0
					0	0
					0	0
					0	0
					0	0
					0	0
					0	0
					0	0
					0	0
					0	0
					0	0
					0	0
					0	0
					0	0
					0	0
					0	0
					0	0
					0	0
					0	0
					0	0
					0	0
					0	0
					0	0
					0	0
					0	0
					0	0
					0	0
					0	0
					0	0
					0	0
					0	0
					0	0
					0	0
					0	0
					0	0
					0	0
					0	0
					0	0
					0	0
					0	0
					0	0
					0	0
					0	0
					0	0
					0	0
					0	0
					0	0
					0	0
					0	0
					0	0
					0	0
					0	0
					0	0
					0	0
					0	0
					0	0
					0	0
					0	0
					0	0
					0	0
					0	0
					0	0
					0	0
					0	0
					0	0
					0	0
					0	0
					0	0
					0	0
					0	0
					0	0
					0	0
					0	0
					0	0
					0	0
					0	0
					0	0
					0	0
					0	0
					0	0
					0	0
					0	0
					0	0
					0	0
					0	0
					0	0
					0	0
					0	0
					0	0
					0	0
					0	0
					0	0
					0	0
					0	0
					0	0
					0	0
					0	0
					0	0
					0	0
					0	0
					0	0
					0	0
					0	0
					0	0
					0	0
					0	0
					0	0
					0	0
					0	0
					0	0
					0	0
					0	0
					0	0
					0	0
					0	0
					0	0
					0	0
					0	0
					0	0
					0	0

## Sheet: pFRG
																									All cells						Astrocytes						NON-Astrocytes						NK1R+ cells						CO2
ID	Strain	Age	DIV	Lens	Region	MrgA1	Image interval	Duration (min)	Exposure time	Protocol	ROI	Measured	Analyzed	Number of active cells	Number of astrocytes	Number of active astrocytes	Number of inactive astrocytes	Number of active non-astrocytes	Number of NK1R positive cells	% active astrocytes of astrocytes	% neurons of all cells	% astrocytes of active cells	% non-astrocytes of active cells	% NK1R of active cells	% NK1R of active NON-astryctes	Fq 0-5 all cells	Fq 5-10 all cells	Fq 10-15 all cells	Fq 15-20 all cells	Fq 40-45 all cells	Fq 45-50 all cells	Fq 0-5 astrocytes	Fq 5-10 astrocytes	Fq 10-15 astrocytes	Fq 15-20 astrocytes	Fq 40-45 astrocytes	Fq 45-50 astrocytes	Fq 0-5 NONastrocytes	Fq 5-10 NONastrocytes	Fq 10-15 NONastrocytes	Fq 15-20 NONastrocytes	Fq 40-45 NONastrocytes	Fq 45-50 NONastrocytes	Fq 0-5 NK1R	Fq 5-10 NK1R	Fq 10-15 NK1R	Fq 15-20 NK1R	Fq 40-45 NK1R	Fq 45-50 NK1R
161027_01-1	MrgA1	P3	14	20x1,0z	pFRG	YES	0,5s	20	100ms	Control 5 min, FLRF 5 min, FLRF 9 min, High potassium 1 min	x	x	5 min interval	115	155	30	125	85	na	19.3548	57.4074	26.087	73.913	na	na	53.1717	89.2433	124.258	134.375			9.93495	29.2078	30.6365	30.8233	na	na	53.9355	69.7851	65.6567	64.1455			na	na	na	na	na
161027_02-1	MrgA1	P3	14	20x1,0z	pFRG	YES	0,5s	20	100ms	Control 5 min, FLRF 5 min, FLRF 9 min, High potassium 1 min	x	x	5 min interval	78	240	57	183	21	na	23.75	75.4717	73.0769	26.9231	na	na	86.0715	123.655	111.613	120.951			17.5696	54.986	58.104	59.0503	na	na	43.6814	88.683	94.8076	104.348			na	na	na	na	na
161125_01-1	MrgA1	P3	11	20x1,0z	pFRG	YES	0,5s	15	100ms	Control 5 min, FLRF 5 min, CO2 5 min	x	x	5 min interval	122	204	50	154	93	13	24.5098	62.5767	40.9836	76.2295	10.6557	13.9785	269.735	296.61	na	na	na		35.5073	85.676	na	na	na	na	278.013	231.487	na	na	na		206.609	217.239	na	na	na
161125_02-1	MrgA1	P3	11	20x1,0z	pFRG	YES	0,5s	15	100ms	Control 5 min, FLRF 5 min, CO2 5 min	x	x	5 min interval	216	296	81	215	155	37	27.3649	57.8125	37.5	71.7593	17.1296	23.871	47.4389	104.948	na	na	na		9.37485	25.4808	na	na	na	na	46.381	79.4347	na	na	na		43.6913	80.9935	na	na	na
161125_03-1	MrgA1	P3	11	20x1,0z	pFRG	YES	0,5s	15	100ms	Control 5 min, FLRF 5 min, CO2 5 min	x	x	5 min interval	69	293	33	260	43	13	11.2628	80.9392	47.8261	62.3188	18.8406	30.2326	125.338	285.529	na	na	na		19.5801	55.3277	na	na	na	na	135.834	225.119	na	na	na		21.2919	45.517	na	na	na
161125_04-1	MrgA1	P3	11	20x1,0z	pFRG	YES	0,5s	15	100ms	Control 5 min, FLRF 5 min, CO2 5 min	x	x	5 min interval	125	212	27	185	105	37	12.7358	62.908	21.6	84	29.6	35.2381	37.9565	66.5022	na	na	na		31.5933	90.3858	na	na	na	na	56.1567	66.1714	na	na	na		52.4203	61.2339	na	na	na
161125_05-1	MrgA1	P3	11	20x1,0z	pFRG	YES	0,5s	15	100ms	Control 5 min, FLRF 5 min, CO2 5 min	x	x	5 min interval	265	205	121	84	204	28	59.0244	43.617	45.6604	76.9811	10.566	13.7255	53.481	92.6524	na	na	na		10.3233	34.6886	na	na	na	na	53.4646	92.7767	na	na	na		54.6951	73.3643	na	na	na
170123_01-1	MrgA1	P3	6	20x1,0z	pFRG	YES	0,5s	15	100ms	Control 5 min, FLRF 5 min, Control 9 min, High potassium 1 min	x	x	5 min interval	108	337	37	300	71	10	10.9792	75.7303	34.2593	65.7407	9.25926	14.0845	72.5913	150.187	180.482	184.917	na		14.2694	60.05	58.6856	55.2478	na	na	124.459	209.349	229.429	225.239	na		98.4389	112.539	144.309	145.689	na
170123_03-1	MrgA1	P3	6	20x1,0z	pFRG	YES	0,5s	15	100ms	Control 5 min, FLRF 5 min, Control 9 min, High potassium 1 min	x	x	5 min interval	148	141	64	77	84	5	45.3901	48.7889	43.2432	56.7568	3.37838	5.95238	104.579	201.579	234.583	245.489	na		26.8916	75.8256	71.6472	52.5074	na	na	239.348	345.433	327.239	290.469	na		202.182	219.342	258.284	259.292	na
170123_05-1	MrgA1	P3	6	20x1,0z	pFRG	YES	0,5s	15	100ms	Control 5 min, FLRF 5 min, Control 9 min, High potassium 1 min	x	x	5 min interval	208	308	82	226	126	8	26.6234	59.6899	39.4231	60.5769	3.84615	6.34921	50.2184	85.782	98.2671	108.177	na		7.45789	35.865	39.8472	40.8436	na	na	67.2389	163.549	166.249	149.479	na		68.3489	90.3589	140.689	147.183	na
170123_08-1	MrgA1	P3	6	20x1,0z	pFRG	YES	0,5s	15	100ms	Control 5 min, FLRF 5 min, Control 9 min, High potassium 1 min	x	x	5 min interval	78	242	28	214	50	5	11.5702	75.625	35.8974	64.1026	6.41026	10	90.1847	160.179	170.853	174.578	na		20.4693	46.9555	40.2852	41.243	na	na	123.659	204.535	209.478	204.478	na		112.434	190.349	213.038	218.249	na
170126_02-1	MrgA1	P3	7	20x1,0z	pFRG	YES	0,5s	10	100ms	Control 5 min, FLRF 5 min + control 10 min	x	x	5 min interval	109	294	46	248	63	5	15.6463	72.9529	42.2018	57.7982	4.58716	7.93651	124.029	201.482	na	na	219.428	220.199	20.6878	62.0738	na	na	64.2476	62.0718	102.483	184.539	na	na	199.244	191.398	90.2489	193.183	na	na	172.589	183.244
170126_03-1	MrgA1	P3	7	20x1,0z	pFRG	YES	0,5s	10	100ms	Control 5 min, FLRF 5 min + control 10 min	x	x	5 min interval	66	224	27	197	39	5	12.0536	77.2414	40.9091	59.0909	7.57576	12.8205	119.73	194.183	na	na	201.872	211.349	22.6852	75.6287	na	na	64.2655	63.1228	134.8	224.898	na	na	226.239	218.459	129.454	228.46	na	na	179.094	162.469
170126_04-1	MrgA1	P3	7	20x1,0z	pFRG	YES	0,5s	10	100ms	Control 5 min, FLRF 5 min + control 10 min	x	x	5 min interval	57	307	22	285	35	3	7.16612	84.3407	38.5965	61.4035	5.26316	8.57143	90.4157	190.285	na	na	220.589	201.358	13.0478	26.1098	na	na	22.0698	24.1078	72.4891	123.24	na	na	124.884	133.469	75.4589	178.009	na	na	169.029	175.995
170127_01-1	MrgA1	P3	7	20x1,0z	pFRG	YES	0,5s	10	100ms	Control 5 min, FLRF 5 min + control 10 min	x	x	5 min interval	91	298	46	252	45	2	15.4362	76.6067	50.5495	49.4505	2.1978	4.44444	102.348	225.088	na	na	232.588	236.535	15.2478	24.0916	na	na	31.2598	32.2698	82.6782	189.348	na	na	186.539	173.539	67.4587	186.083	na	na	156.242	161.359
170127_02-1	MrgA1	P3	7	20x1,0z	pFRG	YES	0,5s	10	100ms	Control 5 min, FLRF 5 min + control 10 min	x	x	5 min interval	138	206	24	182	114	12	11.6505	59.8837	17.3913	82.6087	8.69565	10.5263	86.2871	170.265	na	na	178.223	175.582	10.4918	32.4978	na	na	24.6917	23.9075	68.4891	176.239	na	na	168.459	162.459	88.9023	157.024	na	na	159.129	147.133
170127_03-1	MrgA1	P3	7	20x1,0z	pFRG	YES	0,5s	10	100ms	Control 5 min, FLRF 5 min + control 10 min	x	x	5 min interval	134	271	54	217	80	9	19.9262	66.9136	40.2985	59.7015	6.71642	11.25	138.125	264.877	na	na	270.982	281.899	24.0694	53.2478	na	na	54.6378	56.3178	129.438	210.355	na	na	219.49	201.389	129.589	217.349	na	na	209.348	210.489
170127_04-1	MrgA1	P3	7	20x1,0z	pFRG	YES	0,5s	10	100ms	Control 5 min, FLRF 5 min + control 10 min	x	x	5 min interval	37	242	8	234	29	9	3.30579	86.7384	21.6216	78.3784	24.3243	31.0345	118.489	238.873	na	na	215.811	207.23	22.0918	49.0696	na	na	47.9138	45.6718	143.549	248.589	na	na	228.459	208.334	138.348	203.36	na	na	173.58	158.249
170130_02-1	MrgA1	P3	7	20x1,0z	pFRG	YES	0,5s	10	100ms	Control 5 min, FLRF 5 min + control 10 min	x	x	5 min interval	95	252	45	207	50	6	17.8571	72.6225	47.3684	52.6316	6.31579	12	114.587	258.762	na	na	263.817	260.649	14.0852	42.0878	na	na	50.0476	45.2866	72.3587	140.352	na	na	128.459	118.124	89.3457	173.199	na	na	165.24	145.439
170203_02-1	MrgA1	P3	7	20x1,0z	pFRG	YES	0,5s	15	100ms	Control 5 min, FLRF 5 min, CO2 10 min	x	x	5 min interval	14	340	8	332	6	3	2.35294	96.0452	57.1429	42.8571	21.4286	50	90.2482	236.577	na	na	na		15.0656	65.0438	na	na	na	na	112.477	225.129	na	na	na		98.3891	203.98	na	na	na
170203_03-1	MrgA1	P3	7	20x1,0z	pFRG	YES	0,5s	15	100ms	Control 5 min, FLRF 5 min, CO2 10 min	x	x	5 min interval	29	351	15	336	14	4	4.2735	92.3684	51.7241	48.2759	13.7931	28.5714	119.236	200.439	na	na	na		22.4865	58.9318	na	na	na	na	105.69	214	na	na	na		124.882	202.439	na	na	na
170203_04-1	MrgA1	P3	7	20x1,0z	pFRG	YES	0,5s	15	100ms	Control 5 min, FLRF 5 min, CO2 10 min	x	x	5 min interval	38	69	11	58	27	3	15.942	64.486	28.9474	71.0526	7.89474	11.1111	85.4328	190.437	na	na	na		13.4658	34.6918	na	na	na	na	75.6589	169.349	na	na	na		81.9288	162.398	na	na	na
														106.364	249.409	41.6364	207.773	69.9545	10.85	18.0989	70.4894	40.1049	62.8432	10.9239	17.0849	99.077	183.097	153.343	161.415	225.414	224.35	18.018	50.8147	49.8676	46.6192	44.8917	44.0945	105.558	176.471	182.143	173.026	185.221	175.896	98.7059	159.821	189.08	192.603	173.031	168.047
														61.4695	68.496	26.9166	73.9631	47.7117	10.3888	12.9656	13.1289	12.3635	13.5136	7.38627	11.727	46.6517	66.1269	47.0171	46.5419	28.5817	31.9458	7.19341	19.2505	14.0358	9.79308	15.7932	14.939	57.908	67.6027	87.0681	75.9763	38.8396	33.6857	46.2433	58.0152	49.2678	48.3968	15.4436	20.0494
																				81.9011
																					1
161027_03-1	MrgA1	P3	14	20x1,0z	pFRG	NO	0,5s	20	100ms	Control 5 min, FLRF 5 min, Control 9 min, High potassium 1 min	x	x	5 min interval	143	na	na		na	na			na	na	na	na	75.1325	73.1266	71.5717	80.7651	na		na	na	na	na	na	na	na	na	na	na	na	na	na	na	na	na	na
161031_01-1	C57bl6	P3	13	20x1,0z	pFRG	NO	0,5s	20	100ms	Control 5 min, FLRF 5 min, Control 9 min, High potassium 1 min	x	x	5 min interval	68	na	na		na	na			na	na	na	na	56.4379	58.3258	55.1654	57.1614	na		na	na	na	na	na	na	na	na	na	na	na	na	na	na	na	na	na
161031_02-1	C57bl6	P3	13	20x1,0z	pFRG	NO	0,5s	20	100ms	Control 5 min, FLRF 5 min, Control 9 min, High potassium 1 min	x	x	5 min interval	61	na	na		na	na			na	na	na	na	145.217	138.576	146.899	110.516	na		na	na	na	na	na	na	na	na	na	na	na	na	na	na	na	na	na
161031_03-1	C57bl6	P3	13	20x1,0z	pFRG	NO	0,5s	20	100ms	Control 5 min, FLRF 5 min, Control 9 min, High potassium 1 min	x	x	5 min interval	68	na	na		na	na			na	na	na	na	37.1554	44.6578	43.6725	32.9924	na		na	na	na	na	na	na	na	na	na	na	na	na	na	na	na	na	na
161031_04-1	C57bl6	P3	13	20x1,0z	pFRG	NO	0,5s	20	100ms	Control 5 min, FLRF 5 min, Control 9 min, High potassium 1 min	x	x	5 min interval	188	na	na		na	na			na	na	na	na	101.468	105.183	103.662	98.1765	na		na	na	na	na	na	na	na	na	na	na	na	na	na	na	na	na	na
170123_02-1	MrgA1	P3	6	20x1,0z	pFRG	NO	0,5s	20	100ms	Control 5 min, FLRF 5 min, Control 9 min, High potassium 1 min	x	x	5 min interval	129	na	na		na	6			na	na	4.65116	na	124.002	114.589	121.489	110.458	na		na	na	na	na	na	na	na	na	na	na	na	na	110.358	102.178	107.238	98.3458	na
170123_04-1	MrgA1	P3	6	20x1,0z	pFRG	NO	0,5s	20	100ms	Control 5 min, FLRF 5 min, Control 9 min, High potassium 1 min	x	x	5 min interval	50	na	na		na	8			na	na	16	na	84.5782	89.5239	87.8941	76.2189	na		na	na	na	na	na	na	na	na	na	na	na	na	94.5782	87.3478	83.4781	81.4389	na
170123_06-1	MrgA1	P3	6	20x1,0z	pFRG	NO	0,5s	20	100ms	Control 5 min, FLRF 5 min, Control 9 min, High potassium 1 min	x	x	5 min interval	80	na	na		na	13			na	na	16.25	na	92.4857	92.5677	99.1458	82.5892	na		na	na	na	na	na	na	na	na	na	na	na	na	89.5879	91.398	81.3478	85.1238	na
170123_07-1	MrgA1	P3	6	20x1,0z	pFRG	NO	0,5s	20	100ms	Control 5 min, FLRF 5 min, Control 9 min, High potassium 1 min	x	x	5 min interval	200	na	na		na	9			na	na	4.5	na	149.478	140.589	145.239	130.645	na		na	na	na	na	na	na	na	na	na	na	na	na	135.178	129.781	120.235	131.459	na
170126_01-1	MrgA1	P3	7	20x1,0z	pFRG	NO	0,5s	10	100ms	Control 5 min, FLRF 5 min + control 10 min	x	x	5 min interval	96	na	na		na	7			na	na	7.29167	na	67.3899	80.5782	na	na	54.3259	56.1239	na	na	na	na	na	na	na	na	na	na	na	na	61.3459	65.2389	na	na	57.3589	58.1676
170130_01-1	MrgA1	P3	7	20x1,0z	pFRG	NO	0,5s	10	100ms	Control 5 min, FLRF 5 min + control 10 min	x	x	5 min interval	73	na	na		na	8			na	na	10.9589	na	97.2729	99.412	na	na	67.2895	66.0092	na	na	na	na	na	na	na	na	na	na	na	na	101.349	105.139	na	na	71.0483	78.3241
170130_03-1	MrgA1	P3	7	20x1,0z	pFRG	NO	0,5s	10	100ms	Control 5 min, FLRF 5 min + control 10 min	x	x	5 min interval	37	na	na		na	7			na	na	18.9189	na	52.5829	56.8713	na	na	47.129	49.9918	na	na	na	na	na	na	na	na	na	na	na	na	51.2379	41.2438	na	na	37.4578	45.8924
170207_01-1	MrgA1	P3	7	20x1,0z	pFRG	NO	0,5s	20	100ms	Control 5 min, FLRF 5 min, CO2 10 min	x	x	5 min interval	103	na	na		na	8			na	na	7.76699	na	105.128	119.459	na	na	na		na	na	na	na	na	na	na	na	na	na	na	na	91.3478	115.239	na	na	na
170207_02-1	MrgA1	P3	7	20x1,0z	pFRG	NO	0,5s	20	100ms	Control 5 min, FLRF 5 min, CO2 10 min	x	x	5 min interval	41	na	na		na	5			na	na	12.1951	na	118.358	104.244	na	na	na		na	na	na	na	na	na	na	na	na	na	na	na	136.214	125.214	na	na	na
170207_03-1	MrgA1	P3	7	20x1,0z	pFRG	NO	0,5s	20	100ms	Control 5 min, FLRF 5 min, CO2 10 min	x	x	5 min interval	138	na	na		na	6			na	na	4.34783	na	98.999	91.3478	na	na	na		na	na	na	na	na	na	na	na	na	na	na	na	105.124	106.238	na	na	na
170207_04-1	MrgA1	P3	7	20x1,0z	pFRG	NO	0,5s	20	100ms	Control 5 min, FLRF 5 min, CO2 10 min	x	x	5 min interval	8	na	na		na	3			na	na	37.5	na	71.359	78.3488	na	na	na		na	na	na	na	na	na	na	na	na	na	na	na	78.1329	81.4589	na	na	na
														92.6875	#DIV/0!	#DIV/0!		#DIV/0!	7.27273			#DIV/0!	#DIV/0!	12.7619		92.3152	92.9625	97.1931	86.6135	56.2481	57.375	#DIV/0!	#DIV/0!	#DIV/0!	#DIV/0!	#DIV/0!	#DIV/0!	#DIV/0!	#DIV/0!	#DIV/0!	#DIV/0!	#DIV/0!	#DIV/0!	95.8594	95.4979	98.0746	99.0918	55.2883	60.7947
														52.5354	#DIV/0!	#DIV/0!		#DIV/0!	2.41551			#DIV/0!	#DIV/0!	9.22358		31.0138	26.7482	34.6229	28.1137	8.34199	6.59868	#DIV/0!	#DIV/0!	#DIV/0!	#DIV/0!	#DIV/0!	#DIV/0!	#DIV/0!	#DIV/0!	#DIV/0!	#DIV/0!	#DIV/0!	#DIV/0!	25.3313	24.9371	16.3392	19.7162	13.7912	13.3699
Excluded
161027_02-2	MrgA1	P3	14	20x1,0z	pFRG	YES	0,5s	20	100ms	Control 5 min, FLRF 14 min, High potassium 1 min	x	x	5 min interval	12	113	0	12	0		0		100
170203_01-1	MrgA1	P3	7	20x1,0z	pFRG	YES	0,5s	10	100ms	Control 5 min, FLRF 5 min, CO2 10 min				0											128.125	289.357	na	na	na		103.239	283.349	na	na	na		93.4892	196.239	na	na	na		100.539	172.198	na	na	na		273.128
161125_06-1	MrgA1	P3	11	20x1,0z	pFRG	NO	0,5s	15	100ms	Control 5 min, FLRF 5 min, CO2 5 min	x	x	5 min interval	43	na	na	na	13		na		na			169.095	189.095	na	na	na		na	na	na	na	na		na	na	na	na	na		29.2269	28.679	na	na	na		492.214
[truncated: 32 more columns]

## Sheet: Cell numbers ALL CELLS pFRG
														20	20	20	20	10+10	10+10	10+10	10+10	10+10	10+10	10+10	10+10	15	15	15	20	20	20	20	10+10	10+10	10+10	20	20	20	20
161027_01-1	161027_02-1	161027_02-2	161027_03-1	161031_01-1	161031_02-1	161031_03-1	161031_04-1	161125_01-1	161125_02-1	161125_03-1	161125_04-1	161125_05-1	161125_06-1	170123_01-1	170123_03-1	170123_05-1	170123_08-1	170126_02-1	170126_03-1	170126_04-1	170127_01-1	170127_02-1	170127_03-1	170127_04-1	170130_02-1	170203_02-1	170203_03-1	170203_04-1	170123_02-1	170123_04-1	170123_06-1	170123_07-1	170126_01-1	170130_01-1	170130_03-1	170207_01-1	170207_02-1	170207_03-1	170207_04-1
1	1	1	1	3	1	3	1	1	1	1	1	1	2	4	3	1	1	2	1	1	1	1	1	2	1	1	1	1	1	2	1	1	1	1	1	1	1	1	1
2	2	2	2	4	2	4	2	2	2	2	2	2	3	5	4	2	2	3	2	2	2	2	2	3	2	2	2	2	2	3	2	2	2	2	2	2	2	4	2
4	3	3	3	5	4	5	3	3	3	3	3	3	4	6	5	3	3	4	3	5	3	3	3	4	3	3	3	3	3	4	3	3	3	3	3	3	3	5	3
5	5	4	4	6	6	6	4	4	4	4	4	4	5	7	6	4	5	5	4	6	4	4	4	5	4	4	4	4	4	5	4	4	4	4	4	4	4	7	4
6	6	5	5	7	7	7	5	5	5	5	5	5	6	9	9	5	7	6	5	8	5	5	5	6	5	5	5	5	5	7	5	5	5	5	5	5	5	9	5
7	7	6	6	8	8	8	7	7	6	6	6	6	7	10	10	6	8	7	6	9	6	6	6	7	6	6	6	6	6	9	6	6	6	6	6	6	6	10	6
8	8	7	7	9	10	9	9	8	7	7	7	7	8	11	13	7	11	8	7	11	7	7	7	8	7	7	7	7	7	11	7	7	7	7	7	7	7	11	7
9	9	8	8	10	11	11	10	9	9	8	8	10	9	15	15	8	12	9	8	12	8	8	8	9	8	8	8	8	8	12	8	8	8	8	8	8	8	12	8
10	10	9	9	11	12	13	11	10	11	9	10	11	10	17	21	9	13	10	9	13	9	9	9	10	9	9	9	9	9	13	9	9	9	9	9	9	9	14
11	11	10	10	12	13	14	13	11	12	10	11	12	11	19	23	10	14	11	10	14	10	10	10	11	10	10	10	10	10	14	10	10	10	10	10	10	10	15
12	12	11	11	13	14	16	14	12	13	11	12	13	12	21	24	11	15	12	11	15	11	11	12	12	11	11	11	11	11	15	11	11	11	11	11	11	11	16
13	13	12	12	14	15	17	15	13	14	12	13	14	13	24	25	12	16	13	13	16	12	12	13	13	12	12	12	12	12	16	12	12	12	12	12	12	12	17
14	14		13	15	16	18	17	15	15	13	14	16	14	25	26	13	17	14	15	17	13	13	14	14	13	13	13	13	13	17	13	13	13	13	13	13	13	19
15	15		14	16	18	19	20	17	16	14	15	17	15	26	28	14	18	15	18	18	14	14	16	15	14	14	14	14	14	18	14	14	14	14	14	14	14	21
16	16		15	17	21	20	21	18	17	15	16	20	16	27	29	17	19	16	19	19	15	15	17	16	15		15	15	15	19	15	15	15	15	15	15	15	22
17	17		19	18	22	21	22	19	18	16	17	21	17	28	32	18	20	17	20	20	16	16	18	17	16		16	16	16	20	16	17	16	16	16	16	16	23
18	18		21	19	25	22	24	20	19	17	18	22	18	30	33	19	21	18	22	21	17	17	19	18	17		17	17	17	22	17	18	17	17	17	17	17	24
19	20		22	20	28	23	25	21	20	18	19	23	19	31	36	20	22	19	23	22	18	18	20	19	18		18	18	18	24	18	19	18	18	18	18	18	25
20	21		27	21	29	24	27	22	21	19	20	26	20	32	37	21	23	20	24	23	19	19	21	20	19		19	19	19	28	19	20	19	19	19	19	19	26
22	22		28	22	30	25	28	23	22	20	21	27	21	34	38	23	24	21	28	24	20	20	22	21	20		20	20	20	33	20	21	20	20	20	20	20	27
23	23		29	23	35	26	29	24	23	24	22	28	22	36	41	26	25	22	29	25	21	21	23	22	21		21	21	21	34	21	22	21	21	21	21	21	28
25	24		30	24	37	27	30	27	25	25	23	30	23	37	43	27	26	23	30	26	22	22	27	23	22		22	22	22	38	22	23	22	22	22	22	22	29
26	25		31	25	38	28	31	28	26	27	24	32	24	38	44	28	27	24	32	27	23	23	29	24	23		23	23	23	42	23	24	23	23	23	23	23	30
28	26		32	26	39	29	33	29	27	28	26	33	25	40	45	29	28	25	34	28	24	24	30	25	24		24	24	24	44	24	26	24	24	24	24	24	31
30	27		33	27	43	30	34	30	28	29	27	34	26	42	46	30	34	26	37	29	25	25	32	26	25		25	25	25	45	25	27	25	25	25	25	25	32
31	28		34	28	44	33	35	32	29	30	29	36	27	43	47	31	35	27	38	30	26	26	33	27	26		26	26	26	47	26	28	26	26	26	26	26	33
32	29		35	29	45	35	36	34	30	31	30	39	28	44	50	32	37	28	41	31	27	27	34	28	27		27	27	27	48	27	30	27	27	27	27	27	34
33	30		36	30	46	37	37	35	32	32	31	40	29	45	52	33	38	29	42	32	28	28	35	29	28		28	28	28	49	28	33	28	28	28	28	28	35
34	31		37	31	47	40	39	37	34	34	32	41	30	46	53	34	39	30	44	33	29	29	36	30	29		29	29	29	50	29	34	29	29	29	29	29	36
36	32		38	32	48	41	40	39	36	35	33	42	31	47	54	36	40	31	45	34	30	30	37	31	30			30	30	52	30	35	30	30	30	30	30	37
37	33		39	33	49	42	41	41	37	36	34	44	32	48	55	37	41	32	46	35	31	31	38	32	31			31	31	53	31	36	31	31	31	31	31	38
38	34		40	34	51	43	42	42	39	37	35	45	33	49	56	38	42	33	47	36	32	32	42	33	32			32	32	54	32	37	32	32	32	32	32	39
39	35		41	35	52	49	43	45	40	38	36	46	34	50	57	39	44	34	52	37	33	33	43	34	33			33	33	55	33	38	33	33	33	33	33	40
40	36		42	36	53	50	44	46	41	39	37	47	35	53	58	40	45	35	53	38	34	34	44	35	34			34	34	56	34	39	34	34	34	35	34	41
41	37		43	37	54	51	45	49	43	40	38	51	36	56	59	41	46	36	54	39	36	35	45	36	35			35	35	57	35	40	35	35	35	36	35	42
42	38		45	38	56	52	46	50	44	42	39	53	37	57	60	42	47	37	56	40	37	36	46	37	36			36	36	59	36	41	36	36	36	37	36	43
43	39		46	39	57	54	47	52	45	43	40	54	38	59	63	43	48	38	58	41	38	37	50	38	37			37	37	60	37	42	37	37	37	38	37	44
44	40		47	40	60	55	48	53	46	44	41	55	39	64	64	44	49	41	60	42	39	38	53		38			38	38	61	38	43	38	38		39	38	45
45	41		48	41	61	56	49	55	49	45	42	57	40	65	65	46	50	42	61	43	40	39	54		39				39	62	39	44	39	39		40	39	46
46	42		50	42	62	58	50	57	50	49	43	58	41	66	66	48	52	43	62	44	41	40	55		40				40	63	40	45	40	40		41	40	48
47	43		51	43	63	60	51	60	51	50	44	60	43	67	67	50	56	45	64	45	42	41	56		41				41	64	41	46	41	41		42	41	49
48	44		52	44	65	61	52	62	52	51	46	61	44	68	68	51	57	46	65	46	43	42	59		42				42	65	42	49	42	42		45		50
49	45		53	45	67	63	53	63	53	52	47	62	45	70	69	52	60	49	66	47	44	43	60		43				43	66	43	50	43	43		46		51
50	47		54	46	68	64	55	64	55	53	48	65		72	74	53	61	50	67	48	45	44	62		44				44	67	44	51	44	44		47		52
51	48		55	47	69	65	56	65	56	54	49	66		73	76	54	62	51	68	49	46	45	64		45				45	68	45	52	45	45		48		53
52	49		56	48	70	66	57	66	57	55	51	67		81	79	55	65	53	69	50	47	46	65		46				46	71	46	53	46	46		49		54
53	50		57	49	74	67	58	67	58	56	52	68		83	80	57	66	54	71	51	48	47	73		47				47	72	47	55	47	47		50		55
54	51		58	50	75	69	59	70	59	57	53	69		85	81	60	67	55	76	52	49	48	74		48				48	75	48	56	48	48		51		56
55	52		59	51	76	70	60	72	60	58	54	72		86	83	61	69	56	78	53	50	49	77		49				49	76	49	57	49	49		52		57
56	54		61	52	77	71	62	73	61	59	57	73		88	84	62	70	57	83	54	51	50	80		50				50	78	50	58	50	50		53		58
58	57		62	53	84	72	63	74	62	60	58	75		89	86	64	71	58	87	55	52	51	82		51				51		51	59	51	51		54		60
59	58		63	54	85	73	65	75	64	61	59	76		90	89	65	72	59	88	56	53	52	84		52				52		52	60	52	52		55		61
61	59		64	55	86	75	66	76	65	63	60	77		92	90	66	73	61	89	57	54	53	85		53				53		53	61	53	53		56		62
63	60		66	56	98	76	67	77	66	64	61	78		93	92	67	74	62	90	58	55	54	89		54				54		54	63	54	54		57		63
64	61		67	57	104	77	68	79	67	65	63	79		94	93	68	75	63	91	59	56	55	95		55				55		55	64	55	55		58		64
66	62		68	58	105	78	69	80	68	66	64	82		95	94	69	78	64	92	60	57	56	96		56				56		56	65	56	56		59		65
67	63		69	59	115	80	70	81	69	67	65	83		96	95	72	80	65	94	61	58	57	97		57				57		57	66	57	57		60		66
69	64		70	60	118	81	71	82	71	69	66	84		97	96	73	81	67	95		59	58	103		58				58		58	67	58	58		62		68
70	65		71	61	122	84	72	83	72	70	67	85		99	97	74	82	70	100		60	59	105		59				59		59	69	59	59		63		69
71	66		72	62	124	85	73	85	76	71	68	87		100	98	75	83	71	107		61	60	108		60				60		60	70	60	60		64		72
72	67		73	63	126	86	75	86	77	72	69	90		101	99	77	88	72	108		62	61	110		61				61		61	72	61	61		65		73
73	68		75	64		87	76	87	78	73	70	93		102	100	80	89	73	110		63	62	112		62				62		62	73	62	62		67		74
74	69		76	65		88	77	90	81	76	71	94		103	101	84	91	75	113		64	63	114		63				63		63	74	63	63		70		75
75	71		77	66		91	78	91	83	78	72	96		105	102	87	95	76	116		66	64	118		64				64		64	77	64	64		71		76
76	72		78	67		92	79	92	84	79	73	98		106	103	89	100	78	118		67	65	119		65				65		65	78	65	65		72		78
77	74		79	68		93	80	93	89	80	74	99		107	104	91	103	79	120		68	66	121		66				66		66	79	66	66		73		79
78	75		80	69		94	81	94	90	81	75	101		108	105	92	104	81			69	67	122		67				67		67	82	67	67		74		80
79	77		81	70		100	84	95	91	82	76	102		109	106	93	105	82			70	68	123		68				68		68	83	68	68		75		81
80	78		84				85	96	92	85	77	103		110	108	94	106	83			71	69	124		69				69		69	84	69	69		76		82
81	79		85				86	97	93		78	106		111	109	95	112	84			73	70	126		70				70		70	85	70	70		80		83
82	80		86				87	98	94		79	110		112	110	96	114	85			74	71	129		71				71		71	87	71	71		81		84
83	81		88				88	99	95		80	111		113	111	98	125	89			76	72	130		72				72		72	88	72	72		82		85
84	83		89				89	100	96		81	112		116	112	99	127	90			77	73	134		73				73		73	89	73	73		83		86
85	84		90				90	105	97		82	114		118	115	100	130	91			78	74	136		74				74		74	90	74			84		87
86	85		91				91	107	98		83	115		119	117	101	135	93			79	75	139		75				75		75	91	75			85		88
87	86		93				92	108	99		84	117		120	119	104	140	94			80	76	141		76				76		76	92	76			86		89
90	87		94				93	109	100		85	118		123	120	108	145	95			81	77	144		77				77		77	93	77			90		90
91	91		96				94	111	101		86	119		124	121	109	146	96			82	78	145		78				78		78	94	78			91		91
92			97				95	114	102		87	121		127	122	110		97			83	79	146		79				79		79	95	79			94		93
93			101				96	115	103		88	122		128	123	111		99			84	80	148		80				80		80	96	80			95		94
94			102				97	116	104		89	123		129	124	112		100			85	81	149		81				81			97	81			96		96
95			103				98	117	107		90	124		130	125	114		102			86	82	150		82				82			98	82			97		97
96			104				101	118	108		92	125		136	129	120		103			89	83	154		83				83			99	83			98		98
97			105				102	119	109		94	126		138	130	127		104			90	84	155		84				84			100	84			99		99
98			106				104	120	110		95	127		139	132	130		105			91	85	160		85				85			101	85			100		100
99			107				107	122	111		96	128		140	134	131		106			92	86	164		86				86			102	86			101		101
100			108				109	123	112		98	130		141	138	134		108			93	87	165		87				87			103	87			102		102
101			109				111	124	113		99	132		142	139	135		109			94	88	166		88				88			104	88			103		103
102			110				112	125	114		100	133		144	141	136		110			96	89	168		89				89			105	89			104		104
104			111				113	128	116		101	134		145	142	138		111			97	90	170		90				90			106	90			105		105
105			112				114	129	117		104	140		146	143	139		112			98	91	174		91				91			107	91			106		106
106			113				115	130	119		105	141		148	144	141		114				92	176		92				92			108	92			107		107
108			116				116	131	121		106	142		149	145	142		117				93	179		93				93			109	93			109		108
112			117				117	132	122		107	143		150	146	143		118				94	181		94				94			110	94			110		109
113			118				118	137	123		109	146		151	147	146		119				95	182		95				95			111	95			111		110
114			120				119	139	124		110	147		152	148	147		120				96	185						96			112	96			112		111
118			123				120	140	125		111	148		153	149	148		121				97	187						97			113				113		112
119			124				121	141	127		112	149		154	150	150		122				98	188						98			114				114		113
120			127				124	143	128		113	151		155	151	151		123				99	189						99			115				115		114
121			130				125	144	129		114	154		158	153	165		124				100	190						100			116				116		115
122			132				126	145	130		116	155		159	157	166		125				101	194						101			117				117		116
124			133				127	147	131		118	156		160	159	169		127				102	195						102			118				118		117
125			135				128	148	132		119	157		161	160	170		128				103	196						103			119				119		118
127			136				130	150	133		120	158		162	164	175		129				104	202						104			120						119
128			137				131	152	134		124	159		163	165	176		130				105	204						105			121						120
129			138				132	153	135		125	160		166	166	178		134				106	205						106			122						121
130			140				136	154	136		126	161		168	169	179		135				107	206						107			123						122
133			141				137	161	137		127	162		171	173	180		137				108	211						108			124						123
136			142				141	163	139		129	163			177	181		138				109	214						109			125						125
137			144				142	165	140		130	164			178	185						110	215						110			126						126
138			145				143	167	141		131	165			179	186						111	216						111			128						127
139			146				144	170	142		133	166			182	191						112	218						112			129						128
141			147				145	172	143		134	167			183	193						113	220						113			130						131
142			149				146	173	144		135	168			184	196						114	222						114			131						132
151			150				147	174	145		137	169			185	199						115	223						115			132						133
			151				152	175	146		138	170			187	200						116	225						116			133						134
			152				153	176	147		141	174			188	202						117	226						117			134						135
			154				154	179	148		142	176			189	203						118	229						118			135						136
			155				157	180	149		143	178			190	206						119	234						119			137						137
			156				158	183	150		145	179			191	207						120	235						120			138						138
			157				159	186	151		147	180			192	209						122	236						121			139						139
			158				160	187	152		150	181			193	212						123	237						122			140						140
			159				161		153		151	182			194	213						124	238						123			141						141
			160				162		154		153	183			195	214						125	239						124			142						142
			161				163		155		155	188			196	217						126	240						125			143						144
			163				169		156			189			197	221						127	241						126			144						145
			164				171		157			190			198	222						128	242						127			145						147
			165				173		158			191			201	228						130	246						128			146						148
			166				177		159			192			202	229						131	247						129			147						149
			169				181		160			194			203	234						132	248									148						150
			170				183		161			197			205	236						133	252									149						151
			172				185		162			198			210	237						134	256									150						152
			173				186		163			200			211	238						135	258									151						153
			174				188		164			202			212	239						136	266									152						154
			175				191		165			204			213	241						138										153						155
			176				192		166			208			214	243						139										154						156
			177				193		167			210			215	245						140										155						157
			180				197		170			211			216	247						141										159						159
			181				203		171			212			218	248																161
			184				204		172			213			220	249																162
			188				205		173			214			221	250																163
			189				206		174			215			222	252																164
			192				208		175			218			225	255																165
							209		177			219			227	258																166
							210		178			220			229	259																167
							212		180			221			231	262																168
							215		181			222			232	267																169
							218		182			223			238	274																171
							222		183			224				277																172
							223		184			225				278																173
							224		185			226				279																174
							226		186			227				280																175
							227		187			228				281																177
							229		189			229				282																178
							230		190			230				283																179
							231		191			231				296																180
							232		193			232				298																181
							233		194			233				299																182
							235		195			236				305																184
							236		196			238				306																185
							237		197			239				307																186
							239		198			240				308																187
							242		199			241				309																188
							243		200			242				310																189
							248		201			243				314																190
							253		203			244				315																191
							255		204			245				317																193
							260		206			246				318																194
							262		207			247				322																195
							264		208			248				326																197
							265		209			249				327																198
							268		210			250				328																199
							269		212			252				329																200
							272		213			256				330																201
							275		214			257				331																202
							279		215			273				332																203
							280		216			276				333																204
							281		217			277				334																205
							283		218			280				339																206
							284		219			281				343																207
							286		221			282				347																208
							291		222			285				353																209
							296		223			288				354																210
							298		224			289				355																212
							299		225			292				356																213
							300		227			293				362																214
							314		228			294				363																215
							315		229			295				367																216
									230			296				371																217
									231			299				372																218
									232			301				377																220
									233			302				381																221
									234			308				382																222
									235			309				383																223
									236			310				385																225
									237			311				386																226
									238			312				388																227
									239			313				389																228
									240			314				407																230
									241			315				412																231
									242			317				415
									243			318				419
									245			320				440
									248			322				448
									249			324				449
									250			325				456
									251			327				469
									252			331				482
									253			332
									255			337
									256			339
									258			340
									259			341
									260			342
									261			346
									265			347
												352
												353
												354
												357
												360
												361
												363
												364
												368
												370
												371
												372
												373
												374
												379
												380
												381
												382
												383
												385
												386
												390
												392
												394
												395
												401
												408
												410
												413
												415
												416
												417
												421
												425
												426
												427
												429
												430
												431
												432
												433
												436
												437
												438
												439
												440
												441
												442
												443
115	78	12	143	68	61	68	188	122	216	69	125	265	43

## Sheet: Cell numbers ASTROCYTES pFRG
161027_01-1	161027_02-1	161027_02-2	161027_03-1	161031_01-1	161031_02-1	161031_03-1	161031_04-1	161125_01-1	161125_02-1	161125_03-1	161125_04-1	161125_05-1	161125_06-1	170123_01-1	170123_03-1	170123_05-1	170123_08-1	170126_02-1	170126_03-1	170126_04-1	170127_01-1	170127_02-1	170127_03-1	170127_04-1	170130_02-1	170203_02-1	170203_03-1	170203_04-1
6	2							188	190	83	154	454		10	4	1	13	2	3	1	1	2	3	4	7	2	1	12
11	6							182	189	82	152	453		28	9	4	14	11	7	2	4	16	5	6	8	3	2	14
17	7							171	186	81	123	447		30	29	5	17	17	10	5	5	17	6	7	12	4	3	16
18	8							159	183	77	121	445		32	32	6	19	20	13	8	9	18	7	8	14	6	6	17
21	10							158	182	74	119	436		34	36	7	20	26	18	12	10	31	9	15	17	7	8	19
31	11							157	180	70	118	434		36	37	8	24	29	28	14	11	32	12	16	19	10	9	20
34	15							154	179	60	109	429		37	38	9	26	30	29	16	13	44	13	28	20	13	12	24
36	16							151	175	58	105	422		38	44	10	34	31	32	21	15	45	14	34	21	14	13	25
37	18							150	174	53	97	421		40	46	12	37	32	37	22	17	50	16		23		17	29
45	19							149	168	52	94	417		44	47	13	38	33	38	24	18	51	17		26		19	37
51	22							137	167	50	88	416		46	50	17	39	34	41	26	19	56	19		27		20	38
56	23							136	166	48	87	414		47	52	18	41	35	45	27	22	59	20		28		22
59	24							135	165	44	83	406		48	53	19	46	36	46	35	24	66	21		29		23
67	25							131	156	43	79	403		49	57	20	47	38	47	37	26	68	22		31		26
76	26							127	154	42	76	386		56	59	23	48	41	53	39	27	72	27		33		27
79	27							116	151	40	73	384		57	68	26	49	42	54	44	29	79	29		34
88	28							115	149	38	70	383		66	76	27	50	46	56	45	32	80	32		35
90	29							114	146	37	54	382		68	79	28	52	50	58	47	33	94	35		36
94	30							111	141	36	45	381		70	89	29	56	51	60	49	38	112	36		41
102	31							109	139	32	42	375		81	92	30	57	56	62	50	40	113	42		42
104	32							108	135	28	33	374		83	93	31	69	58	65	53	41	117	44		43
106	33							103	129	26	32	372		85	94	32	70	64	83	55	42	125	46		44
107	34							99	128	24	29	371		93	95	34	74	65	91		46	133	50		47
121	37							95	127	22	28	362		94	97	36	81	71	95		47	135	54		49
131	40							94	124	21	22	361		95	99	37	89	72	100		48		56		50
132	42							93	123	20	12	360		99	101	38	95	75	110		49		59		52
138	44							86	121	19	11	355		101	102	39	100	76	118		50		73		53
141	45							84	120	18		351		102	103	41	140	78			52		74		55
143	46							82	116	17		338		109	105	42		81			54		89		56
147	48							78	115	16		336		113	122	43		83			58		119		60
	50							75	113	14		330		118	123	44		84			60		121		69
	51							71	112	11		320		119	124	46		94			62		122		70
	52							70	111	9		317		123	125	48		97			64		124		71
	53							69	109			316		127	138	51		99			67		130		75
	55							68	108			299		146	139	52		100			69		134		76
	56							66	105			298		148	141	53		105			70		136		78
	57							64	102			297		162	143	54		106			71		141		79
	58							63	100			295			144	55		110			74		144		80
	60							62	95			292			149	60		111			76		148		81
	61							60	94			290			151	61		112			79		149		84
	63							58	93			286			153	62		118			81		176		88
	64							53	91			279			157	64		125			82		181		90
	65							50	89			264			160	65		127			83		187		92
	67							48	88			263			166	66		128			86		189		93
	69							47	87			262			173	67		129			94		194		94
	70							46	82			261			184	68		137			98		195
	73							43	79			259			185	69							205
	77							32	78			257			187	72							216
	78							30	77			256			188	73							218
	79							22	76			255			189	74							225
	83								75			253			192	75							226
	84								74			226			194	77							236
	85								70			223			195	84							239
	86								66			222			211	87							240
	87								65			221			212	89
	89								64			217			213	91
	91								63			216			214	93
									58			213			220	94
	57	0							52			212			222	96
									51			211			225	98
									49			207			227	99
									48			206			229	100
									47			205			231	101
									43			200			232	104
									40			195				111
									36			168				120
									34			163				130
									33			162				131
									31			161				135
									27			160				136
									24			159				138
									21			157				139
									20			154				141
									13			153				142
									12			152				143
									10			151				146
									9			148				147
									8			145				148
									5			142				151
									3			139				166
									1			134				169
												133				170
												131
												129
												128
												127
												124
												119
												118
												116
												115
												113
												112
												111
												110
												109
												108
												107
												104
												102
												100
												97
												95
												94
												89
												86
												82
												81
												80
												76
												74
												69
												66
												64
												58
												56
												55
												37
												36
												31
												28
								50	81	33	27	121		37	64	82	28	46	27	22	46	24	54	8	45	8	15	11
														37	64	82	28	46	27	22	46	24	54	8	45	8	15	11

## Sheet: Cell numbers NON-ASTRO pFRG
161027_01-1	161027_02-1	161027_02-2	161027_03-1	161031_01-1	161031_02-1	161031_03-1	161031_04-1	161125_01-1	161125_02-1	161125_03-1	161125_04-1	161125_05-1	161125_06-1	170123_01-1	170123_03-1	170123_05-1	170123_08-1	170126_02-1	170126_03-1	170126_04-1	170127_01-1	170127_02-1	170127_03-1	170127_04-1	170130_02-1	170203_02-1	170203_03-1	170203_04-1
1	1							1	2	1	1	1		4	3	2	1	3	1	6	2	1	1	2	1	1	4	1
2	3							2	4	2	2	2		5	5	3	2	4	2	9	3	3	2	3	2	5	5	2
4	5							3	6	3	3	3		6	6	11	3	5	4	11	6	4	4	5	3	8	7	3
5	9							4	7	4	4	4		7	10	14	5	6	5	13	7	5	8	9	4	9	10	4
7	12							5	11	5	5	5		9	13	21	7	7	6	15	8	6	10	10	5	11	11	5
8	13							7	14	6	6	6		11	15	33	8	8	8	17	12	7	18	11	6	12	14	6
9	14							8	15	7	7	7		15	21	40	11	9	9	18	14	8	23	12	9		15	7
10	17							9	16	8	8	10		17	23	50	12	10	11	19	16	9	30	13	10		16	8
12	20							10	17	10	10	11		19	24	57	15	12	15	20	20	10	33	14	11		18	9
13	21							11	18	12	13	12		21	25	80	16	13	19	23	21	11	34	17	13		21	10
14	35							12	19	13	14	13		24	26	92	18	14	20	25	23	12	37	18	15		24	11
15	36							13	22	15	15	14		25	28	95	21	15	22	28	25	13	38	19	16		25	13
16	38							15	23	25	16	16		26	33	108	22	16	23	29	28	14	43	20	18		28	15
19	39							17	25	27	17	17		27	41	109	23	18	24	30	30	15	45	21	22		29	18
20	41							18	26	29	18	20		31	43	110	25	19	30	31	31	19	53	22	24			21
22	43							19	28	30	19	21		42	45	112	27	21	34	32	34	20	55	23	25			22
23	47							20	29	31	20	22		43	54	114	28	22	42	33	36	21	60	24	30			23
25	49							21	30	34	21	23		45	55	127	35	23	44	34	37	22	62	25	32			26
26	54							23	32	35	23	26		50	56	134	40	24	52	36	39	23	64	26	37			27
28	59							24	37	39	24	27		53	58	150	42	25	61	38	43	24	65	27	38			28
30	62							27	39	45	26	30		59	60	165	44	27	64	40	44	25	77	29	39			30
32	66							28	41	49	27	32		64	63	176	45	28	66	41	45	26	80	30	40			31
33	68							29	44	51	30	33		65	64	181	60	37	67	42	51	27	82	31	45			32
38	71							34	45	54	31	34		67	65	185	61	43	68	43	53	28	84	32	46			33
39	72							35	46	55	34	39		72	66	191	62	45	69	46	55	29	85	33	48			34
40	74							37	50	56	35	40		73	67	196	65	49	71	48	56	30	95	35	51			35
41	75							39	53	57	36	41		86	69	229	66	53	76	51	57	33	96	36	54			36
42	80							41	55	59	37	42		88	74	277	67	54	78	52	59	34	97	37	57
43	81							42	56	61	38	44		89	80	279	71	55	87	54	61	35	103	38	58
44								45	57	63	39	45		90	81	283	72	57	88	56	63	36	105		59
46								49	59	64	40	46		92	83	298	73	59	89	57	66	37	108		61
47								52	60	65	41	47		96	84	318	75	61	90	58	68	38	110		62
48								55	61	66	43	51		97	86	322	78	62	92	59	73	39	112		63
49								57	62	67	44	53		100	90	326	80	63	94	60	77	40	114		64
50								65	67	69	46	54		103	96	339	82	67	107	61	78	41	118		65
52								67	68	71	47	57		105	98	355	83	70	108		80	42	123		66
53								72	69	72	48	60		106	100	362	88	73	113		84	43	126		67
54								73	71	73	49	61		107	104	382	91	79	116		85	46	129		68
55								74	72	76	51	62		108	106	407	103	82	120		89	47	139		72
58								76	81	78	52	65		110	108	419	104	85			90	48	145		73
61								77	83	79	53	67		111	109	456	105	89			91	49	146		74
63								79	84	80	57	68		112	110	469	106	90			92	52	150		77
64								80	90	85	58	72		116	111	482	112	91			93	53	154		82
66								81	92		59	73		120	112	175	114	93			96	54	155		83
69								83	96		60	75		124	115	178	125	95			97	55	160		85
70								85	97		61	77		128	117	179	127	96				57	164		86
71								87	98		63	78		129	119	180	130	102				58	165		87
72								90	99		64	79		130	120	186	135	103				60	166		89
73								91	101		65	83		136	121	193	145	104				61	168		91
74								92	103		66	84		138	129	199	146	108				62	170		95
75								96	104		67	85		139	130	200		109				63	174
77								97	107		68	87		140	132	202		114				64	179
78								98	110		69	90		141	134	203		117				65	182
80								100	114		71	93		142	142	206		119				67	185
81								105	117		72	96		144	145	207		120				69	188
82								107	119		74	98		145	146	209		121				70	190
83								117	122		75	99		149	147	212		122				71	196
84								118	125		77	101		150	148	213		123				73	202
85								119	130		78	103		151	150	214		124				74	204
86								120	131		80	106		152	159	217		130				75	206
87								122	132		81	114		153	164	221		134				76	211
91								123	133		82	117		154	165	222		135				77	214
92								124	134		84	121		155	169	228		138				78	215
93								125	136		85	122		158	177	234						81	220
95								128	137		86	123		159	178	236						82	222
96								129	140		89	125		160	179	237						83	223
97								130	142		90	126		161	182	238						84	229
98								132	143		92	130		163	183	239						85	234
99								139	144		95	132		166	190	241						86	235
100								140	145		96	140		168	191	243						87	237
101								141	147		98	141		171	193	245						88	238
105								143	148		99	143			196	247						89	241
108								144	150		100	146			197	248						90	242
112								145	152		101	147			198	249						91	246
113								147	153		104	149			201	250						92	247
114								148	155		106	155			202	252						93	248
118								152	157		107	156			203	255						95	252
119								153	158		110	158			205	258						96	256
120								161	159		111	164			210	259						97	258
122								163	160		112	165			215	262						98	266
124								165	161		113	166			216	267						99
125								167	162		114	167			218	274						100
127								170	163		116	169			221	278						101
128								172	164		120	170			238	280						102
129								173	170		124	174				281						103
130								174	171		125	176				282						104
133								175	172		126	178				296						105
136								176	173		127	179				299						106
137								179	177		129	180				305						107
139								180	178		130	181				306						108
142								183	181		131	182				307						109
151								186	184		133	183				308						110
								187	185		134	188				309						111
									187		135	189				310						114
									191		137	190				314						115
									193		138	191				315						116
									194		141	192				317						118
									195		142	194				327						119
									196		143	197				328						120
									197		145	198				329						122
									198		147	202				330						123
									199		150	204				331						124
									200		151	208				332						126
									201		153	210				333						127
									203		155	214				334						128
									204			215				343						130
									206			218				347						131
									207			219				353						132
									208			220				354						134
									209			224				356						136
									210			225				363						138
									212			227				367						139
									213			228				371						140
									214			229				372						141
									215			230				377
									216			231				381
									217			232				383
									218			233				385
									219			236				386
									221			238				388
									222			239				389
									223			240				412
									224			241				415
									225			242				440
									227			243				448
									228			244				449
									229			245
									230			246
									231			247
									232			248		71	84	126	50	63	39	35	45	114	80	29	50	6	14	27
									233			249		71	84	126	50	63	39	35	45	114	80	29	50	6	14	27
									234			250
									235			252
									236			273
									237			276
									238			277
									239			280
									240			281
									241			282
									242			285
									243			288
									245			289
									248			293
									249			294
									250			296
									251			301
									252			302
									253			308
									255			309
									256			310
									258			311
									259			312
									260			313
									261			314
									265			315
												318
												322
												324
												325
												327
												331
												332
												337
												339
												340
												341
												342
												346
												347
												352
												353
												354
												357
												363
												364
												368
												370
												373
												379
												380
												385
												390
												392
												394
												395
												401
												408
												410
												413
												415
												425
												426
												427
												430
												431
												432
												433
												437
												438
												439
												440
												441
												442
												443
								93	155	43	105	204

[truncated: 1 more sheets: Cell numbers NK1R pFRG]
