# Supplementary material for: Astrocytes release prostaglandin E2 to modify respiratory network activity
Source: eLife. 2017 Oct 6;6:e29566. doi: 10.7554/eLife.29566 (PMC5648524; doi:10.7554/eLife.29566)
Supplement: Figure 2—source data 2. [file elife-29566-fig2-data2.xlsx]

## Sheet: preBötC Network
		ID	161020_01-1	161020_03-1	161020_03-2	161021_02-1	161121_01-1	161121_04-1	161124_02-1	161124_03-1	161124_04-1	161124_05-1	161124_06-1	161128_01-1	161128_02-1	161128_03-1	170124_03-1	170124_05-1	170202_01-1	170202_02-1	170202_03-1	170202_04-1	170202_05-1	170202_06-1			161020_02-1	161021_01-1	161025_01-1	161025_02-1	161025_03-1	161025_04-1	161028_01-1	161028_02-1	161028_03-1	161031_05-1	161031_06-1	161121_02-1	170124_01-1	170124_02-1	170124_04-1	170131_01-1	170131_02-1	170131_03-1	170209_01-1	170209_02-1	170209_03-1	170209_04-1	170209_05-1
		Strain	MrgA1	MrgA1	MrgA1	MrgA1	MrgA1	MrgA1	MrgA1	MrgA1	MrgA1	MrgA1	MrgA1	MrgA1	MrgA1	MrgA1	MrgA1	MrgA1	MrgA1	MrgA1	MrgA1	MrgA1	MrgA1	MrgA1			MrgA1	MrgA1	C57bl6	C57bl6	C57bl6	C57bl6	MrgA1	MrgA1	MrgA1	C57bl6	C57bl6	MrgA1	MrgA1	MrgA1	MrgA1	MrgA1	MrgA1	MrgA1	C57bl6	C57bl6	C57bl6	C57bl6	C57bl6
		Age	P3	P3	P3	P3	P3	P3	P3	P3	P3	P3	P3	P3	P3	P3	P3	P3	P3	P3	P3	P3	P3	P3			P3	P3	P3	P3	P3	P3	P3	P3	P3	P3	P3	P3	P3	P3	P3	P3	P3	P3	P3	P3	P3	P3	P3
		DIV	7	7	7	8	7	7	10	10	10	10	10	14	14	14	7	7	14	14	14	14	14	14			7	8	7	7	7	7	14	14	14	13	13	7	7	7	7	14	14	14	9	9	9	9	9
		Lens	20x1,0z	20x1,0z	20x1,0z	20x1,0z	20x1,0z	20x1,0z	20x1,0z	20x1,0z	20x1,0z	20x1,0z	20x1,0z	20x1,0z	20x1,0z	20x1,0z	20x1,0z	20x1,0z	20x1,0z	20x1,0z	20x1,0z	20x1,0z	20x1,0z	20x1,0z			20x1,0z	20x1,0z	20x1,0z	20x1,0z	20x1,0z	20x1,0z	20x1,0z	20x1,0z	20x1,0z	20x1,0z	20x1,0z	20x1,0z	20x1,0z	20x1,0z	20x1,0z	20x1,0z	20x1,0z	20x1,0z	20x1,0z	20x1,0z	20x1,0z	20x1,0z	20x1,0z
		Region	preBötC	preBötC	preBötC	preBötC	preBötC	preBötC	preBötC	preBötC	preBötC	preBötC	preBötC	preBötC	preBötC	preBötC	preBötC	preBötC	preBötC	preBötC	preBötC	preBötC	preBötC	preBötC			preBötC	preBötC	preBötC	preBötC	preBötC	preBötC	preBötC	preBötC	preBötC	preBötC	preBötC	preBötC	preBötC	preBötC	preBötC	preBötC	preBötC	preBötC	preBötC	preBötC	preBötC	preBötC	preBötC
		MrgA1	YES	YES	YES	YES	YES	YES	YES	YES	YES	YES	YES	YES	YES	YES	YES	YES	YES	YES	YES	YES	YES	YES			NO	NO	NO	NO	NO	NO	NO	NO	NO	NO	NO	NO	NO	NO	NO	NO	NO	NO	NO	NO	NO	NO	NO
		Image interval	0,5s	0,5s	0,5s	0,5s	0,5s	0,5s	0,5s	0,5s	0,5s	0,5s	0,5s	0,5s	0,5s	0,5s	0,5s	0,5s	0,5s	0,5s	0,5s	0,5s	0,5s	0,5s			0,5s	0,5s	0,5s	0,5s	0,5s	0,5s	0,5s	0,5s	0,5s	0,5s	0,5s	0,5s	0,5s	0,5s	0,5s	0,5s	0,5s	0,5s	0,5s	0,5s	0,5s	0,5s	0,5s
		Duration (min)	20	20	20	20	2x10	2x10	2x10	2x10	2x10	2x10	2x10	2x10	2x10	2x10	20	20	20	20	20	20	20	20			20	20	20	20	20	20	20	20	20	20	20	2x10	20	20	20	2x10	2x10	2x10	20	20	20	20	20
		Exposure time	100ms	100ms	100ms	100ms	100ms	100ms	100ms	100ms	100ms	100ms	100ms	100ms	100ms	100ms	100ms	100ms	100ms	100ms	100ms	100ms	100ms	100ms			100ms	100ms	100ms	100ms	100ms	100ms	100ms	100ms	100ms	100ms	100ms	100ms	100ms	100ms	100ms	100ms	100ms	100ms	100ms	100ms	100ms	100ms	100ms
		Protocol	Control 5 min, FLRF 5 min, Control 9 min, High potassium 1 min	Control 5 min, FLRF 5 min, Control 9 min, High potassium 1 min	Control 5 min, FLRF 5 min, Control 9 min, High potassium 1 min	Control 5 min, FLRF 5 min, Control 9 min, High potassium 1 min	Control 5 min, FLRF 5 min + Control 10 min	Control 5 min, FLRF 5 min + Control 10 min	Control 5 min, FLRF 5 min + Control 10 min	Control 5 min, FLRF 5 min + Control 10 min	Control 5 min, FLRF 5 min + Control 10 min	Control 5 min, FLRF 5 min + Control 10 min	Control 5 min, FLRF 5 min + Control 10 min	Control 5 min, FLRF 5 min + Control 10 min	Control 5 min, FLRF 5 min + Control 10 min	Control 5 min, FLRF 5 min + Control 10 min	Control 5 min, FLRF 5 min, Control 9 min, High potassium 1 min	Control 5 min, FLRF 5 min, Control 9 min, High potassium 1 min	Control 5 min, FLRF 5 min, CO2 10 min	Control 5 min, FLRF 5 min, CO2 10 min	Control 5 min, FLRF 5 min, CO2 10 min	Control 5 min, FLRF 5 min, CO2 10 min	Control 5 min, FLRF 5 min, CO2 10 min	Control 5 min, FLRF 5 min, CO2 10 min			Control 5 min, FLRF 5 min, Control 4 min, High potassium 1 min	Control 5 min, FLRF 5 min, Control 4 min, High potassium 1 min	Control 5 min, FLRF 5 min, Control 4 min, High potassium 1 min	Control 5 min, FLRF 5 min, Control 4 min, High potassium 1 min	Control 5 min, FLRF 5 min, Control 4 min, High potassium 1 min	Control 5 min, FLRF 5 min, Control 4 min, High potassium 1 min	Control 5 min, FLRF 5 min, Control 4 min, High potassium 1 min	Control 5 min, FLRF 5 min, Control 4 min, High potassium 1 min	Control 5 min, FLRF 5 min, Control 4 min, High potassium 1 min	Control 5 min, FLRF 5 min, Control 4 min, High potassium 1 min	Control 5 min, FLRF 5 min, Control 4 min, High potassium 1 min	Control 5 min, FLRF 5 min + Control 10 min	Control 5 min, FLRF 5 min, Control 9 min, High potassium 1 min	Control 5 min, FLRF 5 min, Control 9 min, High potassium 1 min	Control 5 min, FLRF 5 min, Control 9 min, High potassium 1 min	Control 5 min, FLRF 5 min + Control 10 min	Control 5 min, FLRF 5 min + Control 10 min	Control 5 min, FLRF 5 min + Control 10 min	Control 5 min, FLRF 5 min, CO2 10 min	Control 5 min, FLRF 5 min, CO2 10 min	Control 5 min, FLRF 5 min, CO2 10 min	Control 5 min, FLRF 5 min, CO2 10 min	Control 5 min, FLRF 5 min, CO2 10 min
All cells	Fq 0-5 all cells	'Cutoff:'		0.8	0.8	0.8	0.8	0.8	0.8	0.65	0.65	0.65	0.65	0.65		0.65	0.65	0.65	0.65	0.65	0.65	0.65	0.65	0.65			0.8	0.8	0.8	0.8	0.8	0.8	0.8	0.8	0.8	0.8	0.8	0.8	0.65	0.65	0.65	0.65	0.65	0.65	0.65	0.65	0.65	0.65	0.65
		'Number of correlations:'	633	627	521	423	541	565	628	319	387	402	438	519		439	419	371	427	467	574	484	671	497			740	593	400	401	510	481	671	421	603	464	473	522	451	606	546	279	498	565	318	497	619	454	334
		'Number of active cells:'	38	83	81	23	54	67	79	160	251	83	31	40		35	120	149	73	79	28	133	124	86			67	106	130	171	16	95	66	115	39	77	194	74	91	91	91	36	20	70	16	59	52	77	91
		'Mean correaltion (above cutoff):'	0.828356	0.930255	0.814847	0.81251	0.811938	0.833196	0.829817	0.836776	0.690276	0.755279	0.653088	0.70108		0.705684	0.901546	0.948508	0.883039	0.820402	0.931844	0.702679	0.933008	0.844659			0.817175	0.914536	0.865254	0.806916	0.827819	0.805081	0.818752	0.838714	0.825194	0.879892	0.913611	0.851858	0.714291	0.958435	0.757525	0.724348	0.888982	0.74791	0.856493	0.829539	0.782426	0.847142	0.922993
		'Median correlation (above cutoff):'	0.825653	0.933515	0.813672	0.811197	0.81111	0.825804	0.823384	0.837014	0.683669	0.750139	0.653088	0.690942		0.698718	0.905068	0.951751	0.890561	0.820788	0.939493	0.689967	0.939737	0.84837			0.813017	0.916465	0.865756	0.813145	0.817286	0.8051	0.813783	0.833423	0.827627	0.882352	0.91475	0.839702	0.708841	0.95989	0.755954	0.71282	0.890527	0.744267	0.870044	0.829602	0.786578	0.859372	0.925987
		'99th percentile:'	0.874355	0.971258	0.855662	0.819915	0.835305	0.984272	0.907175	0.938599	0.790789	0.90624	0.653088	0.82671		0.789787	0.955235	0.983667	0.965341	0.917845	0.981213	0.841737	0.976029	0.935595			0.843525	0.961311	0.929531	0.813145	0.861525	0.80885	0.878797	0.91501	0.863131	0.95239	0.966919	0.972705	0.824167	0.984353	0.885233	0.863777	0.964464	0.883884	0.91546	0.916888	0.917922	0.951513	0.968839
		'99th percentile (all):'	1	1	1	1	1	1	1	0.94222	0.609984	1	1	1		1	0.924951	0.961109	1	1	1	0.864784	0.980888	1			1	0.956271	0.841768	0.581522	1	1	1	0.918494	1	1	0.942822	1	1	1	1	1	1	1	1	1	1	1	1
		'Lambda:'	0.839268	0.9127	0.878612	0.932352	0.849835	0.909409	0.922079	0.913267	0.845703	1.00055	0.416612	0.686472		0.472315	0.9981	1.00009	0.937813	1.00032	0.81732	0.53495	0.428919	0.912784			0.112372	0.912872	0.978735	0.714903	0.193939	0.476759	0.208425	0.987666	0.125322	0.747369	0.98771	0.754293	0.975544	0.81827	0.948089	0.850786	0.981721	1.02113	0.918	0.937772	1.05034	1.00049	0.917771
		'Sigma:'	1.56787	5.12781	2.45033	3.37518	2.97059	2.5045	2.13473	1.3819	7.23534	1.01355	2.12841	2.036		1.57938	3.23589	4.12891	3.12891	4.1289	2.125	1.65526	2.12894	4.12891			1.30382	1.00004	1.08093	7.12782	3.51351	2.38913	2.80481	1.25843	3.08734	1.05576	1.00002	7.37735	1.16779	2.88919	1.03889	1.37068	5.1281	1.14019	1.001	2.9177	1.16585	1.01248	3.19881
		'Connectivity:'	0.763158	0.912781	0.382716	0.130435	0.296296	0.343284	0.405063	0.91278	0.286853	0.913746	0.0645161	0.475		0.542857	0.981644	0.98126	0.821684	0.8624	0.951627	0.593985	0.861659	0.9478			0.208955	0.991872	0.984615	0.0175439	0.3125	0.0421053	0.333333	0.991304	0.205128	0.844156	0.81261	0.513514	0.978022	0.981761	0.956044	0.888889	0.912718	0.837618	0.91718	0.716568	0.561287	0.87126	0.897126
		Small world:	1.86814	5.61829	2.78886	3.62007	3.49549	2.75399	2.31513	1.51314	8.55542	1.01299	5.10885	2.96589		3.34392	3.24205	4.12854	3.33639	4.12759	2.59996	3.09424	4.9635	4.52342			11.6028	1.09549	1.10441	9.97033	18.1166	5.01119	13.4571	1.27414	24.6352	1.41263	1.01246	9.78049	1.19706	3.53085	1.09578	1.61107	5.22358	1.1166	1.09042	3.11131	1.10998	1.01198	3.48541
	Fq 5-10 all cells	'Cutoff:'	0.8	0.8		0.8	0.8	0.8	0.8	0.65	0.65	0.65	0.65	0.65	0.65	0.65	0.65	0.65	0.65	0.65	0.65	0.65	0.65	0.65			0.8	0.8	0.8	0.8	0.8	0.8		0.8	0.8	0.8	0.8	0.8	0.65	0.65	0.65	0.65	0.65	0.65	0.65	0.65	0.65	0.65	0.65
		'Number of correlations:'		530		418	370	628	469	451	425	319	613	398	312	408	512	701	591	469	691	581	510	381			613	414	416	722	378	488		451	617	297	518	517	538	461	501	400	397	384	430	303	561	467	521
		'Number of active cells:'		83		23	54	67	79	160	251	83	31	40	82	35	120	149	73	79	28	133	124	86			67	106	130	171	16	95		115	39	77	194	74	91	91	91	36	20	70	16	6	52	77	91
		'Mean correaltion (above cutoff):'		0.821685		0.810971	0.830713	0.826801	0.859263	0.678581	0.835784	0.690661	0.730381	0.805887	0.730729	0.735924	0.923358	0.860232	0.696855	0.806111	0.911588	0.699722	0.706906	0.850336			0.81861	0.839468	0.848084	0.853976	0.832171	0.881481		0.866262	0.822095	0.897942	0.853642	0.826842	0.692994	0.926881	0.874659	0.813391	0.944941	0.828205	0.927691	0.8697	0.927031	0.925374	0.960314
		'Median correlation (above cutoff):'		0.818527		0.819709	0.82764	0.8175	0.853296	0.675353	0.835847	0.684412	0.748906	0.808307	0.722845	0.72668	0.925328	0.867592	0.692156	0.808861	0.913089	0.691184	0.698054	0.851542			0.814919	0.835092	0.846404	0.85191	0.830924	0.881542		0.867047	0.814054	0.90381	0.849466	0.822578	0.686584	0.927656	0.888116	0.813874	0.945206	0.833975	0.926692	0.870121	0.94394	0.947485	0.961204
		'99th percentile:'		0.853874		0.819709	0.877778	0.976719	0.947251	0.713085	0.943433	0.780314	0.79293	0.936271	0.86821	0.900265	0.965517	0.949497	0.786577	0.917624	0.974976	0.800149	0.821391	0.937016			0.86895	0.913657	0.907266	0.924468	0.914413	0.932151		0.939185	0.869588	0.974776	0.936729	0.884737	0.797058	0.96967	0.953991	0.945258	0.981544	0.930725	0.961433	0.905557	0.978719	0.983893	0.984033
		'99th percentile (all):'		1		1	1	1	1	0.612365	0.90474	1	1	1	1	1	0.948086	0.911911	1	1	1	0.798651	0.79583	1			1	0.903685	0.871796	0.861657	1	1		0.925925	1	1	0.884027	1	1	1	1	1	1	1	1	1	1	1	1
		'Lambda:'		0.866286		0.8126	0.698309	0.712671	1.00245	0.909924	0.937816	0.819615	0.892279	0.243278	0.53026	1.02884	0.997377	1.00004	0.681289	1.00032	0.821677	0.667983	0.878061	0.781284			0.664877	0.72138	0.812717	0.71255	0.61241	0.7126		1.06254	0.310819	1.03134	0.6126	0.568597	0.769387	0.613276	0.871278	0.713284	0.715799	0.47819	0.790938	0.7128	0.963033	1.00017	0.812378
		'Sigma:'		2.90182		3.45781	1.37033	1.81359	1.04672	6.42725	2.12781	3.95875	4.57831	1.00019	1.09225	1.47518	9.12717	1.00163	2.0959	1.00263	6.21782	1.73411	2.00308	4.12782			1.85513	1.17416	1.08948	1.02248	1.34787	4.1278		1.51081	2.14969	1.16537	1.0631	1.59039	1.31289	3.32578	1.01099	1.00087	6.12489	1.03427	4.15981	6.12489	2.21359	4.1289	4.12985
		'Connectivity:'		0.725301		0.434783	0.777778	0.283582	0.992371	0.75	0.71849	0.680723	0.758065	0.923871	0.95122	0.914286	0.812617	0.38917	0.369863	0.91271	0.437161	0.706767	0.870968	0.999129			0.477612	0.962264	0.961538	0.6124	0.9375	0.7124		0.416271	0.410256	0.87124	0.21471	0.675676	0.813187	0.752131	0.87124	0.654217	0.57738	0.778239	0.56721	0.832587	0.980769	0.76124	0.712471
		Small world:		3.34973		4.25525	1.96235	2.54478	1.04416	7.0635	2.2689	4.83002	5.13104	4.11131	2.05984	1.43382	9.15118	1.00159	3.07637	1.00231	7.56723	2.59604	2.28125	5.28337			2.79018	1.62766	1.34054	1.43496	2.20093	5.79259		1.42189	6.91621	1.12995	1.73539	2.79704	1.70641	5.42298	1.16035	1.40319	8.55672	2.16288	5.25934	8.59272	2.29856	4.1282	5.08366
	Fq 10-15 all cells	'Cutoff:'	0.8	0.8	0.8												0.65	0.65	0.65	0.65	0.65	0.65	0.65	0.65				0.8	0.8	0.8	0.8	0.8	0.8	0.8	0.8		0.8		0.65	0.65	0.65				0.65	0.65	0.65	0.65	0.65
		'Number of correlations:'	115	202	157												1290	1933	33	472	74	1618	1237	785				1266	12	78	3	920	325	1140	225		2612		1	42	180				20	1	274	446	641
		'Number of active cells:'	38	83	81												120	149	73	79	28	133	124	86				106	130	171	16	95	66	115	39		194		91	91	91				16	59	52	77	91
		'Mean correaltion (above cutoff):'	0.885557	0.833955	0.827652												0.828439	0.941337	0.691418	0.900219	0.808797	0.838216	0.930786	0.870198				0.885193	0.8074	0.817106	0.823027	0.902009	0.91478	0.860145	0.893196		0.868813		0.655624	0.690225	0.703513				0.928454	0.676562	0.920844	0.800748	0.818992
		'Median correlation (above cutoff):'	0.886492	0.828763	0.82459												0.830168	0.945211	0.691401	0.904243	0.809721	0.838496	0.933108	0.870903				0.886465	0.806051	0.81393	0.830304	0.902791	0.914837	0.858767	0.892962		0.867256		0.658791	0.682284	0.694922				0.925977	0.682564	0.932004	0.80267	0.820701
		'99th percentile:'	0.928654	0.899698	0.879822												0.918683	0.978497	0.745371	0.960494	0.922598	0.940208	0.970736	0.944084				0.946164	0.820656	0.85242	0.842929	0.942363	0.954065	0.931244	0.946198		0.947842		0.658791	0.794496	0.80595				0.960067	0.702681	0.970977	0.929577	0.913012
		'99th percentile (all):'	1	1	1												0.8548	0.951384	1	1	1	0.949287	0.977074	1				0.94395	0.723709	0.660848	1	1	1	0.94146	1		0.891324		1	1	1				1	1	1	1	1
		'Lambda:'	1.00136	0.807991	0.755799												0.128189	0.912782	0.357411	0.981263	0.874513	0.861256	0.721518	0.917738				1.00018	0.157415	0.251114	0.187841	1	1	1.00166	1		1.00023		0.0027263	0.394634	0.682589				1	0.0448824	1	1.00129	1
		'Sigma:'	1.02203	1.25262	1.45532												1.00016	2.47182	1.62656	8.32781	2.13891	1	4.12891	3.12398				1.00595	5.02026	2.3433	4.86486	1	1	1.00748	1		1.00795		NaN	1.75467	1.53319				1	1.76451	1	1.01295	1.00094
		'Connectivity:'	0.81267	0.86747	0.839506												0.92178	0.81267	0.438356	0.83161	0.993171	0.94716	0.871263	0.715543				1	0.223077	0.309942	0.3125	1	1	1	1		1		0.032967	0.461538	0.725275				1	0.118644	1	1	1
	Fq 15-20 all cells	'Cutoff:'	0.8	0.8	0.8	0.8											0.65	0.65	0.65	0.65	0.65	0.65	0.65	0.65					0.8	0.8	0.8	0.8		0.8	0.8		0.8								0.65	0.65	0.65	0.65	0.65
		'Number of correlations:'	111	627	209	1											60	271	245	472	74	40	1237	785					12	0	58	920		203	184		21								18	497	265	476	646
		'Number of active cells:'	38	83	81	23											22	56	73	79	28	133	124	86					130	171	16	95		115	39		194								16	59	52	77	91
		'Mean correaltion (above cutoff):'	0.868456	0.953478	0.845753	0.805236											0.903864	0.948421	0.729784	0.91213	0.846569	0.681778	0.951369	0.868881					0.8074	0.800948	0.919282	0.929251		0.827266	0.847528		0.820034								0.71951	0.83118	0.866809	0.942376	0.971927
		'Median correlation (above cutoff):'	0.870649	0.954131	0.842748	0.803189											0.908932	0.952924	0.718984	0.913061	0.844863	0.67392	0.953818	0.873013					0.806051	0.800948	0.917723	0.930051		0.822414	0.845215		0.815815								0.708962	0.832713	0.888712	0.94899	0.972244
		'99th percentile:'	0.942075	0.979596	0.920847	0.816256											0.947502	0.983311	0.858637	0.964722	0.940119	0.784949	0.980161	0.947879					0.820656	0.800948	0.958371	0.95918		0.887419	0.915971		0.874458								0.81884	0.909259	0.957522	0.983227	0.988201
		'99th percentile (all):'	1	1	1	1											1	1	1	1	1	0.732933	0.982305	1					0.723709	0.615129	1	1		0.888661	1		0.690246								1	1	1	1	1
		'Lambda:'	1.00366	1	0.688651	0.0913701											1	0.965484	0.853106	1	1	0.214629	1	1					0.157415	0.000148531	1	1		0.543799	1.00236		0.127582								1.00781	1	1.0011	1	1
		'Sigma:'	1.07562	1	1.3861	3.40541											1	1.00127	1.12287	1	1	4.30752	1	1					5.02026	NaN	1	1		1.56406	1.04742		15.0198								1.02276	1	1.00827	1	1
		'Connectivity:'	1	1	0.814815	0.217391											1	0.982143	0.90411	1	1	0.270677	1	1					0.223077	0.0116959	1	1		0.66087	1		0.206186								1	1	1	1	1
	Fq 40-45 all cells	'Cutoff:'						0.8	0.8	0.65	0.65	0.65	0.65	0.65	0.65	0.65	0.65	0.65	0.65	0.65	0.65	0.65	0.65	0.65														0.8				0.65	0.65	0.65
		'Number of correlations:'						294	11	261	4857	196	8	93	62	223	60	274	4	12	3	9	34	41														11				101	22	201
		'Number of active cells:'						67	9	160	251	83	31	40	82	35	22	56	8	15	7	24	21	21														74				36	20	70
		'Mean correaltion (above cutoff):'						0.843583	0.858773	0.698921	0.895089	0.708398	0.708762	0.740405	0.685369	0.844478	0.927549	0.857627	0.877817	0.865587	0.954789	0.717723	0.93003	0.853194														0.814719				0.746058	0.720807	0.709399
		'Median correlation (above cutoff):'						0.840528	0.852368	0.690513	0.908087	0.697189	0.696402	0.730885	0.678275	0.848804	0.928398	0.868907	0.898146	0.869333	0.953819	0.707514	0.945003	0.865706														0.813334				0.735255	0.718594	0.698927
		'99th percentile:'						0.916757	0.953838	0.802214	0.970252	0.84986	0.835241	0.879943	0.77981	0.938467	0.960814	0.948304	0.951646	0.917301	0.981213	0.831952	0.975802	0.939284														0.852113				0.925306	0.832682	0.835068
		'99th percentile (all):'						1	1	0.724136	0.955936	1	1	1	1	1	1	1	1	1	1	1	1	1														1				1	1	1
		'Lambda:'						0.570859	1	0.554131	1	0.802888	0.456775	0.999518	0.393716	1	1	1.00063	1	1	1	0.456132	1	1														0.0995329				0.955244	0.611098	0.898333
		'Sigma:'						1.38614	1.00117	1.62959	1.00066	1.60429	1.5073	1.11583	2.91872	1	1	1.00547	1	1	1	3.43373	1.00003	1.00037														3.08032				1.47544	1.16977	1.22743
		'Connectivity:'						0.686567	1	0.60625	1	0.879518	0.580645	1	0.5	1	1	1	1	1	1	0.5	1	1														0.175676				0.944444	0.75	0.928571
	Fq 45-50 all cells	'Cutoff:'						0.8	0.8	0.65	0.65	0.65	0.65	0.65	0.65	0.65	0.65	0.65	0.65	0.65	0.65	0.65	0.65	0.65																		0.65	0.65	0.65
		'Number of correlations:'						5	450	2132	1366	743	25	24	0	16	60	287	0	12	3	9	1	41																		31	88	397
		'Number of active cells:'						67	79	160	251	83	31	40	82	35	22	56	8	15	7	24	21	21																		36	20	70
		'Mean correaltion (above cutoff):'						0.833032	0.856841	0.765071	0.716056	0.888235	0.717306	0.699978	0.650857	0.696674	0.827	0.936326	0.681928	0.841953	0.92337	0.696726	0.697006	0.87354																		0.710753	0.882974	0.794496
		'Median correlation (above cutoff):'						0.806595	0.849824	0.761928	0.704787	0.887747	0.703192	0.690743	0.650857	0.69027	0.83124	0.944946	0.681928	0.853929	0.94176	0.68943	0.68018	0.876734																		0.696481	0.882157	0.793506
		'99th percentile:'						0.975249	0.945267	0.896814	0.851587	0.959863	0.857226	0.799489	0.650857	0.785449	0.898488	0.977478	0.681928	0.914385	0.974976	0.780633	0.778877	0.937453																		0.834746	0.956461	0.913259
		'99th percentile (all):'						1	1	0.884225	0.730551	1	1	1	1	1	1	1	1	1	1	1	1	1																		1	1	1
		'Lambda:'						0.0252351	1.00291	1.0003	0.788246	1	0.653215	0.57018	0.00078064	0.304597	1	1	0.0680851	1	1	0.485075	0.784231	1																		0.37325	1	1.00059
		'Sigma:'						NaN	1.04293	1.01027	1.62543	1	1.57334	1.63238	NaN	2.76764	1	1	NaN	1	1	0.875011	1.36394	1																		1.39725	1	1.01988
		'Connectivity:'						0.104478	1	1	0.864542	1	0.774194	0.6	0.0243902	0.371429	1	1	0.25	1	1	0.416667	0.809524	1																		0.472222	1	1
Astrocytes	Fq 0-5 astrocytes	'Cutoff:'	0.8	0.8	0.8		0.8		0.8	0.65	0.65	0.65	0.65	0.65	0.65	0.65	0.65	0.65	0.65	0.65	0.65	0.65	0.65	0.65
		'Number of correlations:'	2	23	37		4		3	239	46	593	1	0	40	1	878	736	0	12	3	58	34	41
		'Number of active cells:'	9	17	39		36		33	45	132	69	15	10	15	12	98	93	8	15	7	24	21	21
		'Mean correaltion (above cutoff):'	0.818047	0.945955	0.836489		0.813494		0.83254	0.852573	0.691541	0.7927	0.653088	0.683785	0.740515	0.751718	0.900999	0.948459	0.702948	0.928689	0.859774	0.843211	0.936604	0.88917
		'Median correlation (above cutoff):'	0.820989	0.947758	0.832927		0.811529		0.827829	0.854981	0.683817	0.791164	0.653088	0.677565	0.72878	0.749638	0.903905	0.950892	0.702815	0.928399	0.864224	0.843521	0.938553	0.893736
		'99th percentile:'	0.822631	0.974077	0.890581		0.835305		0.866967	0.960235	0.793066	0.935774	0.653088	0.727013	0.876889	0.789787	0.955935	0.98363	0.707118	0.961196	0.928772	0.937032	0.974972	0.944184
		'99th percentile (all):'	1	1	1		1		1	1	0.806017	1	1	1	1	1	1	1	1	1	1	1	1	1
		'Lambda:'	0.504968	0.912718	0.705582		0.190379		0.223916	0.81919	0.359529	1.00062	0.0218585	0.91281	1.00429	0.333333	0.91828	0.917763	0.514286	0.7189	0.819271	0.123871	0.917216	0.912718
		'Sigma:'	2.12871	3.12987	1.27173		0.696418		1.04769	2.12098	4.75191	1.00341	8.12782	7.12871	1.02449	6.12871	8.12871	4.12871	1.25	3.12982	3.12981	3.5991	6.12943	2.12981
		'Connectivity:'	0.555556	0.998127	0.769231		0.277778		0.333333	0.81271	0.386364	0.12899	0.133333	0.5	0.9481	0.333333	0.81281	0.912879	0.375	0.91287	0.87431	0.84891	0.98871	0.17983
	Fq 5-10 astrocytes	'Cutoff:'		0.8			0.8		0.8	0.65	0.65	0.65	0.65	0.65		0.65	0.65	0.65	0.65	0.65	0.65	0.65	0.65	0.65
		'Number of correlations:'		1			37		96	6	1671	49	9	6		9	878	735	2	12	3	1	34	41
		'Number of active cells:'		17			36		33	45	132	69	31	10		12	98	93	8	15	7	24	21	21
		'Mean correaltion (above cutoff):'		0.820969			0.828867		0.853366	0.700769	0.854307	0.70598	0.709494	0.816929		0.756163	0.922376	0.86244	0.744036	0.935161	0.882116	0.668125	0.948383	0.877878
		'Median correlation (above cutoff):'		0.824781			0.826311		0.847295	0.695052	0.85637	0.695722	0.695152	0.825517		0.740415	0.924365	0.86742	0.739562	0.936186	0.882205	0.674253	0.954253	0.884023
		'99th percentile:'		0.841842			0.868572		0.94337	0.780773	0.948052	0.833472	0.839034	0.92009		0.92721	0.966365	0.949343	0.83509	0.962141	0.940119	0.67435	0.981938	0.949387
		'99th percentile (all):'		1			1		1	1	0.951326	1	1	1		1	1	1	1	1	1	1	1	1
		'Lambda:'		0.237367			0.684051		1.00834	0.240796	1	0.414721	0.640041	1		0.771084	1	1.00012	1	1	1	0.0723368	1	1
		'Sigma:'		1.64336			1.32448		1.06314	3.08662	1	2.20484	2.34371	1		1.21911	1	0.999883	1	1	1	Inf	1	1
		'Connectivity:'		0.352941			0.722222		1	0.311111	1	0.478261	0.645161	1		0.75	1	1	0.875	1	1	0.166667	1	1
	Fq 10-15 astrocytes	'Cutoff:'	0.8	0.8	0.8				0.8					0.65			0.65	0.65	0.65	0.65	0.65	0.65	0.65	0.65
		'Number of correlations:'	8	7	1				14					9			874	736	323	321	39	162	860	444
		'Number of active cells:'	9	17	39				46					30			98	93	65	65	21	109	103	65
		'Mean correaltion (above cutoff):'	0.889672	0.841032	0.808561				0.830158					0.704846			0.828804	0.944355	0.883886	0.820199	0.923988	0.700532	0.933441	0.841811
		'Median correlation (above cutoff):'	0.897099	0.83206	0.808561				0.824664					0.701981			0.830097	0.945391	0.889434	0.820159	0.933978	0.688402	0.938679	0.84267
		'99th percentile:'	0.920251	0.903642	0.808561				0.888589					0.82671			0.921533	0.978871	0.965447	0.920915	0.974349	0.840196	0.975102	0.93254
		'99th percentile (all):'	1	1	1				1					1			1	1	1	1	1	0.864784	0.942242	1
		'Lambda:'	1.01205	0.918776	0.00768082				0.323401					0.258526			1.0001	1	1	1	1	0.511543	1	1
		'Sigma:'	1.09697	1.12015	NaN				1.93237					1.78967			1.0001	1	1.00001	1	1	2.04245	1	1
		'Connectivity:'	1	0.941176	0.102564				0.413043					0.4			1	1	1	1	1	0.577982	1	1
	Fq 15-20 astrocytes	'Cutoff:'	0.8	0.8	0.8				0.8					0.65			0.65	0.65	0.65	0.65	0.65	0.65	0.65	0.65
		'Number of correlations:'	9	23	23				171					68			10	7	17	320	39	159	204	444
		'Number of active cells:'	9	17	39				46					30			7	8	65	65	21	109	103	65
		'Mean correaltion (above cutoff):'	0.876709	0.961029	0.844872				0.862812					0.801494			0.914422	0.978873	0.699482	0.809571	0.907263	0.69998	0.707356	0.84304
		'Median correlation (above cutoff):'	0.881721	0.962283	0.839622				0.858718					0.801139			0.918366	0.980112	0.693502	0.810862	0.90685	0.691573	0.698849	0.844121
		'99th percentile:'	0.929586	0.982548	1				0.948333					0.942214			0.973452	0.987043	0.786577	0.922184	0.961995	0.798651	0.824822	0.934341
		'99th percentile (all):'	1	1	1				1					1			1	1	1	1	1	0.798651	0.619818	1
		'Lambda:'	1.01333	1	0.442372				1.00168					1.00114			1	1	0.287506	1.00024	1	0.629093	0.854571	1
		'Sigma:'	0.994443	1	1.16063				1.03581					0.999216			1	1	1.59295	0.999944	1	1.80894	1.80779	1
		'Connectivity:'	1	1	0.461538				1					1			1	1	0.369231	1	1	0.697248	0.864078	1
	Fq 40-45 astrocytes	'Cutoff:'							0.8	0.65	0.65	0.65	0.65		0.65	0.65	0.65	0.65	0.65	0.65	0.65	0.65	0.65	0.65
		'Number of correlations:'							1	52	1668	279	0		5	21	10	7	21	321	39	1069	860	444
		'Number of active cells:'							9	45	132	69	16		15	12	7	8	65	65	21	109	103	65
		'Mean correaltion (above cutoff):'							0.877463	0.716698	0.905347	0.731285	0.676226		0.682686	0.828991	0.938196	0.932914	0.692437	0.903748	0.791852	0.837226	0.929612	0.864064
		'Median correlation (above cutoff):'							0.877463	0.706231	0.915955	0.719043	0.67318		0.681936	0.826627	0.936908	0.946914	0.692412	0.906571	0.791718	0.837709	0.932252	0.864709
		'99th percentile:'							0.877463	0.876209	0.977641	0.885473	0.696844		0.718535	0.942577	0.974792	0.962028	0.745611	0.961428	0.897261	0.939796	0.969231	0.942054
		'99th percentile (all):'							1	1	0.989576	1	1		1	1	1	1	1	1	1	0.949287	0.939787	1
		'Lambda:'							0.0564263	0.663117	1	0.928679	0.230922		0.37774	1	1	1	0.318045	1	1	1	1	1
		'Sigma:'							0	1.37764	1.00017	1.33546	0		0	1	1	1	2.40007	1	1	1	1	1
		'Connectivity:'							0.222222	0.777778	1	0.942029	0.375		0.666667	1	1	1	0.415385	1	1	1	1	1
	Fq 45-50 astrocytes	'Cutoff:'							0.8	0.65	0.65	0.65	0.65		0.65	0.65	0.65	0.65	0.65	0.65	0.65	0.65	0.65	0.65
		'Number of correlations:'							11	237	718	611	7		465	0	10	7	182	321	39	24	860	444
		'Number of active cells:'							9	45	132	69	16		67	12	7	8	65	65	21	109	103	65
		'Mean correaltion (above cutoff):'							0.858064	0.803621	0.728789	0.907514	0.691215		0.72885	0.702481	0.865367	0.916159	0.727476	0.913582	0.834924	0.682967	0.951919	0.866042
		'Median correlation (above cutoff):'							0.849729	0.806199	0.720094	0.908084	0.682432		0.71932	0.699767	0.871568	0.96125	0.717412	0.914645	0.83518	0.675754	0.953779	0.869711
		'99th percentile:'							0.95706	0.934816	0.863609	0.971116	0.774247		0.864285	0.711141	0.949687	0.985867	0.858637	0.965692	0.928754	0.784949	0.980204	0.944239
		'99th percentile (all):'							1	1	0.886201	1	1		1	1	1	1	1	1	1	0.732933	0.954863	1
		'Lambda:'							1	1	0.876207	1	0.607024		0.898267	0.166154	1	1	0.875589	1	1	0.201995	1	1
		'Sigma:'							1.00117	1.0008	1.29425	1	1.743		1.08687	0	1	1	1.19534	1	1	3.21652	1	1
		'Connectivity:'							1	1	0.916667	1	0.6875		0.940299	0.333333	1	1	0.907692	1	1	0.275229	1	1
NON-astrocytes	Fq 0-5 NONastrocytes	'Cutoff:'	0.8	0.8	0.8	0.8		0.8	0.8	0.65	0.65	0.65	0.65	0.65		0.65			0.65	0.65	0.65	0.65	0.65	0.65
		'Number of correlations:'	22	496	16	0		10	0	1327	23	195	2	47		17			1	26	10	2	19	18
		'Number of active cells:'	29	74	71	20		8	46	125	133	41	16	30		23			5	17	9	22	11	13
		'Mean correaltion (above cutoff):'	0.83072	0.929293	0.813898	0.81251		0.852611	0.808466	0.835449	0.696934	0.756444	0.691137	0.741467		0.694974			0.919405	0.840735	0.923187	0.703783	0.905704	0.839611
		'Median correlation (above cutoff):'	0.8266	0.932716	0.812771	0.811197		0.846829	0.816358	0.835893	0.691937	0.746101	0.67945	0.731271		0.692346			0.918992	0.842878	0.934114	0.674476	0.933475	0.85659
		'99th percentile:'	0.875893	0.970875	0.838593	0.819915		0.911188	0.816358	0.938877	0.785681	0.915859	0.743206	0.893716		0.779124			0.959922	0.945148	0.971644	0.964525	0.972	0.950519
		'99th percentile (all):'	1	1	1	1		1	1	0.94222	0.549017	1	1	1		1			1	1	1	1	1	1
		'Lambda:'	0.637033	0.912781	0.267148	0.0314399		0.912871	0.00958142	0.83891	0.164476	1.00229	0.300855	0.994958		0.467319			0.12819	0.98881	0.93871	0.248588	0.91289	1.00629
		'Sigma:'	1.46201	1	6.74498	4.5		2.49813	7.12871	1	8.96532	1.01228	1.48879	1.18175		1.08391			1.4892	8.13871	5.12891	2.80878	1.00427	0.995741
		'Connectivity:'	0.758621	0.98127	0.323944	0.15		0.875	0.0652174	0.983	0.218045	0.8128	0.5	0.983218		0.608696			0.984298	0.82138	0.980284	0.409091	0.9428	0.913847
	Fq 5-10 NONastrocytes	'Cutoff:'		0.8		0.8	0.8	0.8	0.8	0.65	0.65	0.65		0.65		0.65			0.65	0.65	0.65	0.65	0.65	0.65
		'Number of correlations:'		22		0	2	5	170	4	1291	3		12		47			0	26	10	3	2	18
		'Number of active cells:'		74		20	11	8	46	125	133	41		30		23			5	17	9	22	11	13
		'Mean correaltion (above cutoff):'		0.821197		0.810971	0.834376	0.837186	0.861099	0.675656	0.823915	0.692944		0.701683		0.72661			0.704222	0.835322	0.89881	0.722987	0.683539	0.870144
		'Median correlation (above cutoff):'		0.818513		0.819709	0.83239	0.821751	0.856691	0.675353	0.823614	0.69034		0.690684		0.719663			0.704276	0.836283	0.910742	0.715473	0.670186	0.871629
		'99th percentile:'		0.853874		0.819709	0.886557	0.90218	0.94719	0.713085	0.937577	0.73573		0.796369		0.844363			0.704276	0.940913	0.950267	0.96941	0.790267	0.95355
		'99th percentile (all):'		1		1	1	1	1	0.612365	0.827267	1		1		1			1	1	1	1	1	1
		'Lambda:'		0.225034		0.0477227	1	0.834157	1.00332	0.0243796	1	0.0603031		0.51011		0.843653			0.4914	1	1	0.350612	1	1
		'Sigma:'		1.77522		NaN	1	1.42392	1.02784	11.4016	1.00001	9.86087		1.12543		1.62748			0	1	1	3.09625	1	1
		'Connectivity:'		0.324324		0.15	0.545455	0.875	1	0.072	1	0.146341		0.6		1			0.6	1	1	0.5	0.636364	1
	Fq 10-15 NONastrocytes	'Cutoff:'	0.8	0.8	0.8		0.8							0.65					0.65	0.65	0.65	0.65	0.65	0.65
		'Number of correlations:'	61	150	126		5							0					0	26	10	43	21	18
		'Number of active cells:'	29	74	71		11							6					5	17	9	22	11	13
		'Mean correaltion (above cutoff):'	0.883073	0.834183	0.825463		0.842262							0.709218					0.717248	0.904467	0.807383	0.828684	0.934661	0.888137
		'Median correlation (above cutoff):'	0.883734	0.829485	0.822588		0.838523							0.717278					0.714284	0.911954	0.794513	0.826302	0.93743	0.887611
		'99th percentile:'	0.926113	0.899698	0.874632		0.90892							0.793219					0.737323	0.973016	0.893022	0.93837	0.962643	0.954623
		'99th percentile (all):'	1	1	1		1							1					1	1	1	1	1	1
		'Lambda:'	1	0.812745	0.737013		1							0.861538					0.426136	1	1	1	1	1
		'Sigma:'	1	1.32577	1.6432		1							0.887757					1.76471	1	1	1	1	1
		'Connectivity:'	1	0.864865	0.830986		0.909091							0.833333					0.6	1	1	1	1	1
	Fq 15-20 NONastrocytes	'Cutoff:'	0.8	0.8	0.8	0.8								0.65	0.65				0.65	0.65	0.65	0.65	0.65	0.65
		'Number of correlations:'	52	496	93	1								0	43				1	26	10	1	21	18
		'Number of active cells:'	29	74	39	20								6	67				5	17	9	22	11	13
		'Mean correaltion (above cutoff):'	0.865787	0.953534	0.861429	0.805236								0.824516	0.683595				0.738376	0.921221	0.833733	0.758746	0.951746	0.887018
		'Median correlation (above cutoff):'	0.864721	0.954211	0.859591	0.803189								0.833172	0.676307				0.692669	0.921984	0.833415	0.65964	0.955233	0.887912
		'99th percentile:'	0.942159	0.979566	0.928825	0.816256								0.942214	0.768706				0.84367	0.973833	0.91453	0.959985	0.977855	0.960529
		'99th percentile (all):'	1	1	1	1								1	1				1	1	1	1	1	1
		'Lambda:'	1.00101	1	1.00271	0.210843								1	0.342614				1	1	1	0.0444444	1	1
		'Sigma:'	1.11322	1	1.07446	1.71429								1	2.38817				1	1	1	0	1	1
		'Connectivity:'	1	1	1	0.25								1	0.432836				1	1	1	0.227273	1	1
	Fq 40-45 NONastrocytes	'Cutoff:'						0.8		0.65	0.65	0.65	0.65		0.65	0.65
		'Number of correlations:'						13		174	1291	66	4		16	92
		'Number of active cells:'						8		125	133	41	15		11	23
		'Mean correaltion (above cutoff):'						0.90552		0.701971	0.823915	0.709615	0.728493		0.74295	0.851468
		'Median correlation (above cutoff):'						0.904473		0.694062	0.823614	0.69738	0.73113		0.747373	0.852491
		'99th percentile:'						0.952646		0.805677	0.937577	0.850008	0.835241		0.880438	0.932701
		'99th percentile (all):'						1		0.724136	0.827267	1	1		1	1
		'Lambda:'						0.790588		0.509714	1	0.873998	0.506897		0.854402	1
		'Sigma:'						1.06513		2.02124	1.00001	1.40917	1.91577		1.02421	1
		'Connectivity:'						0.875		0.568	1	0.926829	0.6		0.909091	1
	Fq 45-50 NONastrocytes	'Cutoff:'						0.8		0.65	0.65	0.65	0.65			0.65
		'Number of correlations:'						4		1254	249	203	4			4
		'Number of active cells:'						8		125	133	41	15			23
		'Mean correaltion (above cutoff):'						0.833258		0.760503	0.705518	0.88612	0.735658			0.695677
		'Median correlation (above cutoff):'						0.833736		0.756792	0.694765	0.884537	0.720047			0.687018
		'99th percentile:'						0.877694		0.894624	0.837493	0.96277	0.880635			0.751285
		'99th percentile (all):'						1		0.884225	0.67167	1	1			1
		'Lambda:'						0.512315		1.00067	0.666341	1	0.689552			0.110839
		'Sigma:'						2.59259		1.01303	1.63571	1	1.59259			1.48738
		'Connectivity:'						0.625		1	0.774436	1	0.733333			0.304348
NK1R+ cells	Fq 0-5 NK1R	'Cutoff:'					0.8	0.8		0.65	0.65	0.65	0.65	0.65		0.65																						0.8	0.65	0.65	0.65	0.65	0.65	0.65	0.65	0.65	0.65	0.65	0.65
		'Number of correlations:'					13	0		108	36	22	1	0		2																						1	48	4	1	1	18	53	2	3	5	3	4
		'Number of active cells:'					54	8		31	16	15	15	6		6																						6	24	4	4	3	9	25	6	6	7	8	9
		'Mean correaltion (above cutoff):'					0.819089	0.856212		0.843133	0.835247	0.774638	0.727607	0.783196		0.681596																						0.833405	0.716411	0.965822	0.786169	0.800947	0.915279	0.750913	0.870117	0.823495	0.755837	0.833201	0.925345
		'Median correlation (above cutoff):'					0.818412	0.856212		0.847153	0.837579	0.759049	0.719041	0.774018		0.690257																						0.833405	0.711259	0.969873	0.799147	0.812172	0.9147	0.749156	0.870044	0.815705	0.756826	0.860077	0.932173
		'99th percentile:'					0.868494	0.856212		0.941563	0.927152	0.933901	0.832338	0.893716		0.690257																						0.833405	0.831504	0.970414	0.835572	0.82512	0.964464	0.866804	0.902916	0.870805	0.83319	0.910874	0.969315
		'99th percentile (all):'					1	1		1	1	1	1	1		1																						1	1	1	1	1	1	1	1	1	1	1	1
		'Lambda:'					0.518766	0.0715084		1	1	1.01345	0.62212	1.02703		0.375																						0.125	1	1	1	1	1	1.02222	1	1	1	1	1
		'Sigma:'					3.95119	0		1	1	1.00404	2.51517	0.9911		NaN																						0	1	1	1	1	1	1.1119	1	1	1.00402	1	1
		'Connectivity:'					0.5	0.25		1	1	1	0.666667	1		0.5																						0.333333	1	1	1	1	1	1	1	1	1	1	1
	Fq 5-10 NK1R	'Cutoff:'					0.8	0.8		0.65		0.65		0.65		0.65																						0.8	0.65	0.65	0.65	0.65	0.65	0.65	0.65		0.65	0.65	0.65
		'Number of correlations:'					2	0		0		0		0		6																						1	22	4	1	1	18	62	2		5	3	4
		'Number of active cells:'					6	8		31		15		6		6																						6	24	4	4	3	9	25	6		7	8	9
		'Mean correaltion (above cutoff):'					0.818783	0.816175		0.657705		0.700726		0.701076		0.722486																						0.840803	0.690573	0.925394	0.902981	0.926572	0.950662	0.832273	0.922524		0.939988	0.945287	0.962753
		'Median correlation (above cutoff):'					0.811741	0.816175		0.657705		0.708063		0.697656		0.7287																						0.845304	0.68429	0.9259	0.913258	0.918019	0.950573	0.835299	0.922451		0.938159	0.956317	0.96368
		'99th percentile:'					0.852913	0.816175		0.657705		0.73573		0.753545		0.763604																						0.869287	0.795516	0.946815	0.92182	0.945258	0.979582	0.94397	0.934621		0.95725	0.975613	0.98598
		'99th percentile (all):'					1	1		1		1		1		1																						1	1	1	1	1	1	1	1		1	1	1
		'Lambda:'					0.603774	0.0727273		0.00531215		0.140393		1		0.728745																						0.878049	0.733181	1	1	1	1	1.00608	1		1	1	1
		'Sigma:'					0.809249	NaN		NaN		5.26316		1		1.11893																						1.06101	1.41196	1	1	1	1	1.02631	1		1	1	1
		'Connectivity:'					0.666667	0.25		0.0645161		0.266667		0.666667		0.833333																						0.833333	0.75	1	1	1	1	1	1		1	1	1
	Fq 10-15 NK1R	'Cutoff:'													0.65																										0.65				0.65		0.65	0.65	0.65
		'Number of correlations:'													1																										1				2		5	3	4
		'Number of active cells:'													11																										4				6		7	8	9
		'Mean correaltion (above cutoff):'													0.679046																										0.708002				0.92476		0.931241	0.786776	0.832656
		'Median correlation (above cutoff):'													0.665751																										0.708002				0.924163		0.938624	0.794472	0.83775
		'99th percentile:'													0.752215																										0.708002				0.936963		0.959498	0.897215	0.920165
		'99th percentile (all):'													1																										1				1		1	1	1
		'Lambda:'													0.393496																										0.253968				1		1	1	1
		'Sigma:'													0																										0				1		1	1.01069	1
		'Connectivity:'													0.545455																										0.5				1		1	1	1
	Fq 15-20 NK1R	'Cutoff:'									0.65																																		0.65	0.65	0.65	0.65	0.65
		'Number of correlations:'									36																																		2	3	5	3	4
		'Number of active cells:'									16																																		6	6	7	8	9
		'Mean correaltion (above cutoff):'									0.888944																																		0.937921	0.801913	0.849709	0.914622	0.974586
		'Median correlation (above cutoff):'									0.895703																																		0.940357	0.794782	0.861342	0.939192	0.975625
		'99th percentile:'									0.964788																																		0.948909	0.855527	0.927038	0.976988	0.987203
		'99th percentile (all):'									1																																		1	1	1	1	1
		'Lambda:'									1																																		1	1	1	1	1
		'Sigma:'									1																																		1	1	1	1	1
		'Connectivity:'									1																																		1	1	1	1	1
	Fq 40-45 NK1R	'Cutoff:'						0.8		0.65	0.65	0.65	0.65			0.65																										0.65	0.65	0.65
		'Number of correlations:'						2		17	6	11	1			6																										1	6	38
		'Number of active cells:'						8		31	16	15	6			6																										3	9	25
		'Mean correaltion (above cutoff):'						0.84837		0.709344	0.691453	0.735693	0.696402			0.850538																										0.847752	0.75532	0.709421
		'Median correlation (above cutoff):'						0.843185		0.710869	0.681685	0.731198	0.696402			0.858858																										0.853317	0.759068	0.702105
		'99th percentile:'						0.89356		0.783439	0.766169	0.875012	0.696402			0.884324																										0.858804	0.811433	0.822984
		'99th percentile (all):'						1		1	1	1	1			1																										1	1	1
		'Lambda:'						0.661654		0.470756	0.620037	0.861986	0.125			1																										1	0.498462	0.814715
		'Sigma:'						0.870968		1.58224	1.42418	1.24908	0			1																										1	1.14859	1.17325
		'Connectivity:'						0.75		0.516129	0.75	0.933333	0.333333			1																										1	0.666667	0.88
	Fq 45-50 NK1R	'Cutoff:'						0.8		0.65		0.65	0.65																													0.65	0.65	0.65
		'Number of correlations:'						3		107		22	1																													1	18	66
		'Number of active cells:'						7		31		15	6																													3	9	25
		'Mean correaltion (above cutoff):'						0.842718		0.767679		0.891178	0.72562																													0.706533	0.901817	0.813197
		'Median correlation (above cutoff):'						0.842212		0.765434		0.893213	0.73151																													0.665776	0.901615	0.818604
		'99th percentile:'						0.848832		0.89316		0.968927	0.746832																													0.792228	0.955105	0.930615
		'99th percentile (all):'						1		1		1	1																													1	1	1
		'Lambda:'						0.254105		1		1	0.272727																													1	1	1.00606
		'Sigma:'						4.5		1.00001		1	1.8																													1	1	1.04957
		'Connectivity:'						0.428571		1		1	0.5																													1	1	1

## Sheet: pFRG Network
		ID	161027_01-1	161027_02-1	161125_01-1	161125_02-1	161125_03-1	161125_04-1	161125_05-1	170123_01-1	170123_03-1	170123_05-1	170123_08-1	170126_02-1	170126_03-1	170126_04-1	170127_01-1	170127_02-1	170127_03-1	170127_04-1	170130_02-1	170203_02-1	170203_03-1	170203_04-1				161027_03-1	161031_01-1	161031_02-1	161031_03-1	161031_04-1	170123_02-1	170123_04-1	170123_06-1	170123_07-1	170126_01-1	170130_01-1	170130_03-1	170207_01-1	170207_02-1	170207_03-1	170207_04-1
		Strain	MrgA1	MrgA1	MrgA1	MrgA1	MrgA1	MrgA1	MrgA1	MrgA1	MrgA1	MrgA1	MrgA1	MrgA1	MrgA1	MrgA1	MrgA1	MrgA1	MrgA1	MrgA1	MrgA1	MrgA1	MrgA1	MrgA1				MrgA1	C57bl6	C57bl6	C57bl6	C57bl6	MrgA1	MrgA1	MrgA1	MrgA1	MrgA1	MrgA1	MrgA1	MrgA1	MrgA1	MrgA1	MrgA1
		Age	P3	P3	P3	P3	P3	P3	P3	P3	P3	P3	P3	P3	P3	P3	P3	P3	P3	P3	P3	P3	P3	P3				P3	P3	P3	P3	P3	P3	P3	P3	P3	P3	P3	P3	P3	P3	P3	P3
		DIV	14	14	11	11	11	11	11	6	6	6	6	7	7	7	7	7	7	7	7	7	7	7				14	13	13	13	13	6	6	6	6	7	7	7	7	7	7	7
		Lens	20x1,0z	20x1,0z	20x1,0z	20x1,0z	20x1,0z	20x1,0z	20x1,0z	20x1,0z	20x1,0z	20x1,0z	20x1,0z	20x1,0z	20x1,0z	20x1,0z	20x1,0z	20x1,0z	20x1,0z	20x1,0z	20x1,0z	20x1,0z	20x1,0z	20x1,0z				20x1,0z	20x1,0z	20x1,0z	20x1,0z	20x1,0z	20x1,0z	20x1,0z	20x1,0z	20x1,0z	20x1,0z	20x1,0z	20x1,0z	20x1,0z	20x1,0z	20x1,0z	20x1,0z
		Region	pFRG	pFRG	pFRG	pFRG	pFRG	pFRG	pFRG	pFRG	pFRG	pFRG	pFRG	pFRG	pFRG	pFRG	pFRG	pFRG	pFRG	pFRG	pFRG	pFRG	pFRG	pFRG				pFRG	pFRG	pFRG	pFRG	pFRG	pFRG	pFRG	pFRG	pFRG	pFRG	pFRG	pFRG	pFRG	pFRG	pFRG	pFRG
		MrgA1	YES	YES	YES	YES	YES	YES	YES	YES	YES	YES	YES	YES	YES	YES	YES	YES	YES	YES	YES	YES	YES	YES				NO	NO	NO	NO	NO	NO	NO	NO	NO	NO	NO	NO	NO	NO	NO	NO
		Image interval	0,5s	0,5s	0,5s	0,5s	0,5s	0,5s	0,5s	0,5s	0,5s	0,5s	0,5s	0,5s	0,5s	0,5s	0,5s	0,5s	0,5s	0,5s	0,5s	0,5s	0,5s	0,5s				0,5s	0,5s	0,5s	0,5s	0,5s	0,5s	0,5s	0,5s	0,5s	0,5s	0,5s	0,5s	0,5s	0,5s	0,5s	0,5s
		Duration (min)	20	20	15	15	15	15	15	15	15	15	15	10	10	10	10	10	10	10	10	15	15	15				20	20	20	20	20	20	20	20	20	10	10	10	20	20	20	20
		Exposure time	100ms	100ms	100ms	100ms	100ms	100ms	100ms	100ms	100ms	100ms	100ms	100ms	100ms	100ms	100ms	100ms	100ms	100ms	100ms	100ms	100ms	100ms				100ms	100ms	100ms	100ms	100ms	100ms	100ms	100ms	100ms	100ms	100ms	100ms	100ms	100ms	100ms	100ms
		Protocol	Control 5 min, FLRF 5 min, FLRF 9 min, High potassium 1 min	Control 5 min, FLRF 5 min, FLRF 9 min, High potassium 1 min	Control 5 min, FLRF 5 min, CO2 5 min	Control 5 min, FLRF 5 min, CO2 5 min	Control 5 min, FLRF 5 min, CO2 5 min	Control 5 min, FLRF 5 min, CO2 5 min	Control 5 min, FLRF 5 min, CO2 5 min	Control 5 min, FLRF 5 min, Control 9 min, High potassium 1 min	Control 5 min, FLRF 5 min, Control 9 min, High potassium 1 min	Control 5 min, FLRF 5 min, Control 9 min, High potassium 1 min	Control 5 min, FLRF 5 min, Control 9 min, High potassium 1 min	Control 5 min, FLRF 5 min + control 10 min	Control 5 min, FLRF 5 min + control 10 min	Control 5 min, FLRF 5 min + control 10 min	Control 5 min, FLRF 5 min + control 10 min	Control 5 min, FLRF 5 min + control 10 min	Control 5 min, FLRF 5 min + control 10 min	Control 5 min, FLRF 5 min + control 10 min	Control 5 min, FLRF 5 min + control 10 min	Control 5 min, FLRF 5 min, CO2 10 min	Control 5 min, FLRF 5 min, CO2 10 min	Control 5 min, FLRF 5 min, CO2 10 min				Control 5 min, FLRF 5 min, Control 9 min, High potassium 1 min	Control 5 min, FLRF 5 min, Control 9 min, High potassium 1 min	Control 5 min, FLRF 5 min, Control 9 min, High potassium 1 min	Control 5 min, FLRF 5 min, Control 9 min, High potassium 1 min	Control 5 min, FLRF 5 min, Control 9 min, High potassium 1 min	Control 5 min, FLRF 5 min, Control 9 min, High potassium 1 min	Control 5 min, FLRF 5 min, Control 9 min, High potassium 1 min	Control 5 min, FLRF 5 min, Control 9 min, High potassium 1 min	Control 5 min, FLRF 5 min, Control 9 min, High potassium 1 min	Control 5 min, FLRF 5 min + control 10 min	Control 5 min, FLRF 5 min + control 10 min	Control 5 min, FLRF 5 min + control 10 min	Control 5 min, FLRF 5 min, CO2 10 min	Control 5 min, FLRF 5 min, CO2 10 min	Control 5 min, FLRF 5 min, CO2 10 min	Control 5 min, FLRF 5 min, CO2 10 min
All cells	Fq 0-5 all cells	'Cutoff:'	0.8	0.8	0.65	0.65		0.65	0.65	0.65	0.65	0.65	0.65	0.65	0.65	0.65	0.65	0.65	0.65	0.65	0.65	0.65	0.65	0.65				0.8	0.8	0.8		0.8	0.65	0.65	0.65	0.65	0.65	0.65	0.65	0.65	0.65	0.65	0.65
		'Number of correlations:'	120	41	242	102		98	120	34	179	120	101	144	179	91	133	156	147	134	216	127	184	140				120	141	219		129	138	186	98	138	92	86	76	88	102	112	94
		'Number of active cells:'	115	78	122	216		125	265	108	148	208	78	109	66	57	91	138	134	37	95	14	29	38				143	68	61		188	129	50	80	200	96	73	37	103	41	138	8
		'Mean correaltion (above cutoff):'	0.831877	0.829667	0.725486	0.817371		0.690974	0.871087	0.691121	0.936314	0.82181	0.696848	0.690945	0.685723	0.784696	0.706527	0.762084	0.872403	0.935385	0.711818	0.83958	0.76427	0.733155				0.81858	0.928358	0.873927		0.827149	0.751675	0.945284	0.734748	0.78762	0.703883	0.86468	0.835625	0.70927	0.89517	0.740868	0.690173
		'Median correlation (above cutoff):'	0.827248	0.823022	0.714746	0.81876		0.68617	0.872201	0.685174	0.937242	0.827772	0.696848	0.684363	0.6783	0.788874	0.698108	0.759844	0.873514	0.937341	0.697707	0.833523	0.762358	0.725973				0.814668	0.933421	0.875155		0.82286	0.742915	0.945461	0.721866	0.785183	0.694906	0.86436	0.836191	0.701171	0.901868	0.73752	0.681174
		'99th percentile:'	0.901352	0.898962	0.882455	0.925783		0.92073	0.950682	0.802447	0.975084	0.920333	0.696848	0.767375	0.779186	0.902156	0.821149	0.880402	0.935466	0.979615	0.846478	0.994885	0.887947	0.856057				0.851401	0.971583	0.939314		0.88646	0.907125	0.984885	0.879205	0.924699	0.833096	0.937638	0.903352	0.823986	0.963805	0.854697	0.782435
		'99th percentile (all):'	0.830574	1	0.912883	0.934638		0.530514	0.950661	0.622371	0.964709	0.894634	1	0.64411	1	1	1	0.873379	0.930227	1	1	1	1	1				0.627702	1	1		0.858795	0.789085	1	1	0.801808	1	1	1	0.859897	1	0.816675	1
		'Lambda:'	0.795136	0.363344	0.897907	1.00004		0.773141	0.9237	0.828892	0.89126	1.00011	0.43617	0.370775	0.840738	0.7831	0.7572	1.00005	0.8913	0.981277	0.985046	0.912716	1.00239	1.26857				0.835299	0.771953	1.00173		0.420924	1.00114	0.6127	0.612784	0.512761	0.712671	0.81261	0.8137	0.7612	0.612561	1.00063	0.933333
		'Sigma:'	1.52985	1.66332	2.42973	1.00227		4.81486	1.00001	3.86643	2.12891	1.00532	8.31781	2.61339	2.93566	1.0084	1.93761	1.00562	2.13728	2.12891	3.62965	2.98817	1.00147	2.6284				6.21449	1.002	1.04008		1.86701	1.04182	6.1289	1.27368	1.00111	1.83079	3.1267	4.13287	1.41801	1	1.02576	0.937735
		'Connectivity:'	0.852174	0.461538	0.688525	0.71289		0.136	0.91278	0.305556	0.891287	0.913271	0.025641	0.431193	0.80303	0.913271	0.769231	0.3717	0.37718	0.972973	0.873684	0.923722	0.65782	0.868421				0.146853	0.817	0.7812		0.473404	0.923719	0.999127	0.9625	0.91743	0.851261	0.81937	0.943718	0.902913	0.618217	0.31782	0.875
		Small world:	1.92401	4.57781	2.706	1.00223		6.22766	1.08261	4.66458	2.38865	1.00521	19.0701	7.04847	3.49177	1.2877	2.55892	1.00557	2.39794	2.16953	3.68475	3.27393	0.999078	2.07194				7.43983	1.298	1.03829		4.43549	1.04063	10.0031	2.07851	1.95239	2.56891	3.84773	5.07911	1.86286	1.63249	1.02512	1.00472
	Fq 5-10 all cells	'Cutoff:'	0.8	0.8		0.65		0.65	0.65	0.65	0.65	0.65	0.65	0.65	0.65	0.65	0.65	0.65	0.65	0.65	0.65	0.65	0.65	0.65				0.8	0.8	0.8		0.8	0.65	0.65	0.65	0.65	0.65	0.65	0.65	0.65	0.65		0.65
		'Number of correlations:'	120	254		201		121	134	167	318	239	129	89	76	68	177	169	143	123	104	127	91	146				223	132	147		129	147	186	98	71	70	183	189	124	233		61
		'Number of active cells:'	115	78		216		125	265	108	148	208	78	109	66	57	91	138	134	37	95	14	29	38				143	68	61		188	129	50	80	200	96	73	37	103	41		8
		'Mean correaltion (above cutoff):'	0.835526	0.847188		0.722585		0.906616	0.755146	0.688741	0.752312	0.868193	0.662099	0.762974	0.811496	0.704245	0.719216	0.805561	0.817542	0.7062	0.705944	0.826794	0.893033	0.754899				0.890754	0.936563	0.829606		0.865067	0.7442	0.855755	0.828728	0.712479	0.735335	0.745243	0.750083	0.752388	0.807627		0.879934
		'Median correlation (above cutoff):'	0.82927	0.842395		0.71227		0.906567	0.751127	0.680373	0.747184	0.877996	0.650367	0.762045	0.811271	0.69609	0.710466	0.805191	0.823971	0.701189	0.700825	0.829047	0.896341	0.750788				0.891613	0.943438	0.823787		0.864741	0.735019	0.854328	0.829064	0.701559	0.728103	0.741325	0.749918	0.748401	0.810159		0.893423
		'99th percentile:'	0.916225	0.926705		0.859417		0.968139	0.897542	0.767537	0.898239	0.949931	0.685631	0.906044	0.891534	0.834483	0.842069	0.90101	0.915622	0.806573	0.800892	0.994263	0.953969	0.869948				0.948072	0.975422	0.888992		0.935039	0.895752	0.955269	0.945706	0.849814	0.879618	0.870413	0.832328	0.881401	0.922672		0.947219
		'99th percentile (all):'	0.89757	1		0.866931		0.948043	0.84236	0.700959	0.839179	0.924492	1	0.74913	1	1	1	0.889034	0.909331	1	1	1	1	1				0.900517	1	1		0.944334	0.753395	1	1	0.581566	1	1	1	0.909173	1		1
		'Lambda:'	0.908055	0.829475		0.989131		0.98172	1.00049	0.340688	1.0003	1.00007	0.8712	0.982778	0.61267	0.813584	0.961236	0.8771	0.971182	0.631803	0.407365	0.912798	0.9618	1.00305				0.7126	0.971435	0.572292		1.00027	1.00148	0.8127	0.61287	0.5127	0.964835	1.00087	0.871299	1.13035	1.0006		0.998172
		'Sigma:'	1.37147	1.24775		1.25609		2.3819	1.04222	2.01434	1.01198	1.00429	7.38791	1.06616	2.8137	1.47208	1.20699	1	1.00099	1.35275	1.81775	3.91884	2.1289	1.05329				1.0001	1.00088	2.21839		1.01467	1.07064	3.13278	1	3.1989	1.07022	1.0239	4.1278	1.12164	4.12781		3.48759
		'Connectivity:'	0.930435	0.871795		0.990741		0.612	0.747188	0.407407	0.75799	0.747129	0.384615	0.981651	0.615554	0.877193	0.978022	0.812778	0.985075	0.675676	0.494737	0.843781	0.41947	0.871328				0.847879	0.985294	0.622951		0.712671	0.91277	0.512567	0.74138	0.675	0.979167	0.712761	0.612561	0.970874	0.74617		0.716
		Small world:	1.51034	1.50427		1.2699		2.42625	1.04171	5.91258	1.01168	1.00422	8.48015	1.08484	4.59252	1.80938	1.25566	1.14012	1.03069	2.14109	4.46221	4.29322	2.21345	1.05009				1.40345	1.03031	3.87633		1.0144	1.06905	3.85478	1.63167	6.23932	1.10922	1.02301	4.73753	0.992291	4.12531		3.49398
	Fq 10-15 all cells	'Cutoff:'		0.8	0.65	0.65	0.65	0.65	0.65	0.65	0.65	0.65										0.65	0.65	0.65				0.8	0.8	0.8	0.8	0.8	0.65	0.65	0.65	0.65				0.65	0.65	0.65	0.65
		'Number of correlations:'		17	866	4237	8	1216	4139	934	3452	2656										27	91	37				2171	302	1	5	666	1919	186	50	3284				823	234	1740	7
		'Number of active cells:'		29	122	216	69	125	265	108	148	208										14	29	38				143	68	61	68	188	129	50	80	200				103	41	138	8
		'Mean correaltion (above cutoff):'		0.840248	0.728405	0.806215	0.694811	0.83082	0.724564	0.891332	0.861639	0.732293										0.905262	0.878815	0.685403				0.868614	0.885219	0.831973	0.833321	0.830102	0.84805	0.858705	0.699839	0.754128				0.736724	0.929619	0.834077	0.76155
		'Median correlation (above cutoff):'		0.835964	0.717433	0.805321	0.688421	0.829229	0.715274	0.891037	0.861959	0.727674										0.899226	0.887232	0.680658				0.868887	0.886635	0.84273	0.826592	0.824759	0.848236	0.857889	0.69693	0.747068				0.73277	0.929699	0.835219	0.764169
		'99th percentile:'		0.914891	0.879961	0.924271	0.809672	0.942546	0.865207	0.962603	0.94504	0.860368										0.99424	0.94933	0.738489				0.936902	0.941427	0.84273	0.884767	0.894409	0.949613	0.954798	0.785577	0.904442				0.857954	0.973206	0.912207	0.852362
		'99th percentile (all):'		1	0.922088	0.940307	1	0.897163	0.819119	0.954817	0.92411	0.784746										1	1	1				0.863785	1	1	1	0.895117	0.865943	1	1	0.766544				0.89067	1	0.880979	1
		'Lambda:'		0.528395	1.00473	1	0.250499	1	1.00352	1	1	1.0012										1	1	0.409689				1.0001	1.00227	0.00480328	0.0575314	0.680167	1	1	0.307854	1.00065				1.00052	1	1	0.817778
		'Sigma:'		1.37534	1.25296	1.00001	2.09229	1	1.1407	1	1	1.07534										1	1	1.41688				1.0054	1.06264	NaN	5.37415	1.5284	1	1	1.58615	1.02115				1.02294	1	1	1.11467
		'Connectivity:'		0.62069	1	1	0.362319	1	1	1	1	1										1	1	0.5				1	1	0.0491803	0.132353	0.776596	1	1	0.4125	1				1	1	1	0.875
	Fq 15-20 all cells	'Cutoff:'	0.8	0.8						0.65	0.65	0.65																	0.8	0.8	0.8	0.8	0.65	0.65	0.65	0.65				0.65	0.65	0.65	0.65
		'Number of correlations:'	1152	81						934	3452	3353																	357	0	1	2818	1919	186	176	1785				723	35	1740	9
		'Number of active cells:'	115	78						108	148	208																	68	61	68	188	129	50	80	200				103	41	138	8
		'Mean correaltion (above cutoff):'	0.89609	0.834275						0.920207	0.888778	0.876138																	0.916769	0.80083	0.81046	0.939175	0.886813	0.873892	0.725196	0.725391				0.726806	0.704613	0.8422	0.798417
		'Median correlation (above cutoff):'	0.898642	0.829363						0.920305	0.888539	0.882883																	0.920861	0.800955	0.811538	0.939341	0.886795	0.873162	0.718741	0.712104				0.720583	0.6952	0.842999	0.79578
		'99th percentile:'	0.957287	0.906045						0.973666	0.960101	0.945356																	0.959683	0.800955	0.812578	0.973251	0.96337	0.961778	0.845124	0.876011				0.853524	0.789965	0.918002	0.910032
		'99th percentile (all):'	0.955937	1						0.967658	0.933919	0.920227																	1	1	1	0.975205	0.898603	1	1	0.721007				0.87487	1	0.894203	1
		'Lambda:'	1.00023	0.541223						1	1	1																	1.00043	0.00578634	0.0492973	1	1	1	0.587553	0.977629				0.915321	0.524195	1	1
		'Sigma:'	1.00066	1.34636						1	1	1.00002																	1.00062	NaN	Inf	1	1	1	1.36577	1.22925				1.03068	1.72098	1	1
		'Connectivity:'	1	0.653846						1	1	1																	1	0.0491803	0.0441176	1	1	1	0.675	0.985				0.951456	0.560976	1	1
	Fq 40-45 all cells	'Cutoff:'													0.65	0.65	0.65	0.65	0.65	0.65	0.65																0.65	0.65	0.65
		'Number of correlations:'													453	166	563	80	1441	138	392																906	260	19
		'Number of active cells:'													66	57	91	138	134	37	95																96	73	37
		'Mean correaltion (above cutoff):'													0.849444	0.734229	0.766401	0.682314	0.762824	0.836246	0.724557																0.915252	0.708786	0.681856
		'Median correlation (above cutoff):'													0.867687	0.72996	0.766613	0.677426	0.761814	0.836992	0.712937																0.916424	0.700478	0.676494
		'99th percentile:'													0.936075	0.862326	0.886175	0.761687	0.871947	0.9329	0.865074																0.96876	0.827375	0.749707
		'99th percentile (all):'													1	1	1	0.580855	0.873706	1	1																1	1	1
		'Lambda:'													1	0.978367	0.981978	0.299091	0.985688	1	0.953292																1	1.0124	0.648795
		'Sigma:'													1	1.09749	1.03013	3.49473	1.00232	1	1.36205																1	1.62408	1.75114
		'Connectivity:'													1	0.982456	0.989011	0.384058	0.992537	1	0.978947																1	0.986301	0.783784
	Fq 45-50 all cells	'Cutoff:'												0.65	0.65		0.65	0.65	0.65	0.65	0.65																0.65	0.65
		'Number of correlations:'												223	82		679	260	1472	23	768																569	533
		'Number of active cells:'												109	66		91	138	134	37	95																96	73
		'Mean correaltion (above cutoff):'												0.697459	0.68271		0.917377	0.693088	0.910573	0.7062	0.785482																0.715695	0.887538
		'Median correlation (above cutoff):'												0.688072	0.676367		0.918354	0.685062	0.910651	0.701189	0.785175																0.70519	0.886906
		'99th percentile:'												0.802178	0.766756		0.963899	0.789342	0.956953	0.806573	0.91299																0.865651	0.947914
		'99th percentile (all):'												0.699857	1		1	0.722533	0.958633	1	1																1	1
		'Lambda:'												0.747814	0.734517		1	0.619528	1	0.630146	1.00032																0.99976	1
		'Sigma:'												1.44456	1.74013		1	1.46406	1	1.69257	1.01563																1.15733	1
		'Connectivity:'												0.853211	0.848485		1	0.724638	1	0.675676	1																1	1
Astrocytes	Fq 0-5 astrocytes	'Cutoff:'	0.8	0.8	0.65	0.65	0.65	0.65	0.65	0.65	0.65	0.65			0.65	0.65	0.65	0.65	0.65		0.65	0.65	0.65	0.65
		'Number of correlations:'	18	21	102	552	1	1	2174	6	197	511			32	31	96	22	159		59	2	12	5
		'Number of active cells:'	31	57	50	81	69	27	121	37	37	82			27	22	46	24	54		45	8	15	11
		'Mean correaltion (above cutoff):'	0.829138	0.828439	0.788936	0.842461	0.700788	0.717097	0.908066	0.698977	0.948876	0.849647			0.689873	0.797458	0.806906	0.827571	0.836405		0.78303	0.809218	0.77513	0.826421
		'Median correlation (above cutoff):'	0.827396	0.826656	0.792691	0.844477	0.720042	0.691074	0.912337	0.689124	0.949326	0.853175			0.684502	0.804964	0.817753	0.857585	0.85957		0.762094	0.84014	0.787442	0.827012
		'99th percentile:'	0.883034	0.87933	0.979017	0.945221	0.720042	0.798927	0.97859	0.802447	0.985639	0.935337			0.794759	0.894597	0.949879	0.975304	0.94695		0.963878	0.908942	0.881279	0.923488
		'99th percentile (all):'	1	1	1	1	1	1	0.988707	1	1	1			1	1	1	1	1		1	1	1	1
		'Lambda:'	0.658135	0.346533	0.976994	0.91371	0.0044785	0.983872	0.912718	0.28392	0.726189	0.83819			0.719992	1.00211	1.09988	1.13426	1.01677		0.95018	0.3819	0.75248	0.952201
		'Sigma:'	1.46398	1.89483	2.34645	3.13288	9.13781	3.73981	1.00001	5.64952	4.12891	1.00002			2.12984	1.00051	1.30176	1.60566	1.39214		1.80124	2.48913	1.1064	2.06186
		'Connectivity:'	0.774194	0.421053	0.82	0.991717	0.0434783	0.296296	0.81271	0.351351	0.871238	0.912718			0.925926	0.99128	0.913717	0.976162	0.817646		0.866667	0.888167	0.8	0.981
	Fq 5-10 astrocytes	'Cutoff:'	0.8	0.8	0.65	0.65	0.65	0.65	0.65	0.65	0.65	0.65			0.65	0.65	0.65	0.65	0.65		0.65	0.65	0.65	0.65
		'Number of correlations:'	30	179	39	362	26	58	2011	11	192	511			131	15	90	29	197		68	7	12	3
		'Number of active cells:'	31	57	50	81	33	27	121	37	37	82			27	22	46	24	54		45	8	15	11
		'Mean correaltion (above cutoff):'	0.839542	0.85132	0.708776	0.74747	0.711829	0.919951	0.795833	0.695865	0.793798	0.895818			0.816207	0.709622	0.827288	0.831165	0.750546		0.744882	0.86651	0.820501	0.782818
		'Median correlation (above cutoff):'	0.836137	0.8494	0.699868	0.745388	0.703327	0.923128	0.798316	0.690895	0.790658	0.901376			0.816045	0.700863	0.849546	0.842541	0.747193		0.73626	0.876899	0.84615	0.77089
		'99th percentile:'	0.922266	0.923588	0.800108	0.879027	0.823932	0.982422	0.925125	0.770915	0.935867	0.959237			0.8939	0.829767	0.956303	0.955651	0.891407		0.889955	0.923902	0.940315	0.913103
		'99th percentile (all):'	1	1	1	1	1	1	0.940448	1	1	1			1	1	1	1	1		1	1	1	1
		'Lambda:'	0.779812	0.823245	0.312501	0.954284	0.592189	1	1.00064	0.285484	1.00148	1			1	0.97301	1.05218	1.03083	1.05674		0.929514	1.14286	1.04823	0.49152
		'Sigma:'	1.31024	1.18015	2.17442	1.10106	1.47267	1	1.01917	1.43207	0.9993	1			1	1.21571	1.35124	1.41987	1.54866		1.49421	0.97402	1.36126	1.16885
		'Connectivity:'	0.83871	0.859649	0.38	0.975309	0.69697	1	1	0.459459	1	1			1	0.954545	1	1	1		0.888889	1	1	0.818182
	Fq 10-15 astrocytes	'Cutoff:'		0.8	0.65	0.65	0.65	0.65	0.65	0.65	0.65	0.65										0.65	0.65
		'Number of correlations:'		292	287	552	17	58	1894	118	197	488										5	11
		'Number of active cells:'		78	50	81	33	27	121	37	37	82										8	15
		'Mean correaltion (above cutoff):'		0.851831	0.791675	0.836913	0.694478	0.859131	0.78508	0.902399	0.89238	0.749351										0.795661	0.820265
		'Median correlation (above cutoff):'		0.848524	0.787151	0.837966	0.692529	0.858556	0.787909	0.902848	0.891824	0.745671										0.808341	0.844186
		'99th percentile:'		0.931982	0.972095	0.939562	0.790595	0.96453	0.918459	0.968134	0.969033	0.885738										0.92862	0.921424
		'99th percentile (all):'		1	1	1	1	1	0.938314	1	1	1										1	1
		'Lambda:'		0.847364	1.00218	1	0.468873	1	1.01092	1	1	1.00043										1.12195	1.19481
		'Sigma:'		1.11059	1.03737	1	2.00955	1	1.02723	1	1	1.00864										1.05508	1.50704
		'Connectivity:'		0.897436	1	1	0.545455	1	1	1	1	1										1	1
	Fq 15-20 astrocytes	'Cutoff:'	0.8	0.8						0.65	0.65	0.65										0.65	0.65	0.65
		'Number of correlations:'	108	201						118	197	511										3	10	12
		'Number of active cells:'	31	57						37	37	82										8	15	11
		'Mean correaltion (above cutoff):'	0.887558	0.855578						0.928852	0.913999	0.895192										0.857468	0.802096	0.834968
		'Median correlation (above cutoff):'	0.892397	0.854217						0.93035	0.915346	0.895841										0.879041	0.811369	0.869291
		'99th percentile:'	0.944794	0.926415						0.975354	0.977956	0.955682										0.93733	0.885983	0.931284
		'99th percentile (all):'	1	1						1	1	1										1	1	1
		'Lambda:'	1.00205	1						1	1	1										1.26829	1.06709	0.76347
		'Sigma:'	1.00739	1						1	1	1										1.79583	1.28636	2.06302
		'Connectivity:'	1	0.894737						1	1	1										1	1	1
	Fq 40-45 astrocytes	'Cutoff:'													0.65	0.65
		'Number of correlations:'													131	30
		'Number of active cells:'													27	22
		'Mean correaltion (above cutoff):'													0.855587	0.745517
		'Median correlation (above cutoff):'													0.874575	0.749165
		'99th percentile:'													0.935514	0.844728
		'99th percentile (all):'													1	1
		'Lambda:'													1	1
		'Sigma:'													1	1.02076
		'Connectivity:'													1	1
	Fq 45-50 astrocytes	'Cutoff:'													0.65
		'Number of correlations:'													26
		'Number of active cells:'													27
		'Mean correaltion (above cutoff):'													0.685284
		'Median correlation (above cutoff):'													0.678445
		'99th percentile:'													0.778095
		'99th percentile (all):'													1
		'Lambda:'													0.889373
		'Sigma:'													1.36768
		'Connectivity:'													0.925926
NON-astrocytes	Fq 0-5 NONastrocytes	'Cutoff:'	0.8	0.8	0.65	0.65	0.65	0.65	0.65	0.65	0.65	0.65	0.65	0.65		0.65	0.65	0.65	0.65		0.65	0.65	0.65	0.65
		'Number of correlations:'	186	14	154	2222	0	8	3766	109	525	516	4	14		48	86	463	204		58	2	16	21
		'Number of active cells:'	92	29	93	155	43	105	204	71	84	126	50	46		35	45	114	80		50	6	14	27
		'Mean correaltion (above cutoff):'	0.832378	0.83354	0.72321	0.815708	0.720042	0.688509	0.871141	0.728215	0.88553	0.778789	0.69342	0.691228		0.79721	0.800688	0.835546	0.822841		0.808622	0.747583	0.743218	0.743452
		'Median correlation (above cutoff):'	0.827737	0.827179	0.712228	0.816874	0.720042	0.684244	0.871549	0.720046	0.901507	0.785303	0.678525	0.685868		0.807547	0.809476	0.829097	0.842186		0.822538	0.75567	0.72754	0.737914
		'99th percentile:'	0.90248	0.901893	0.879011	0.924868	0.720042	0.92073	0.95017	0.848805	0.97289	0.897796	0.777908	0.7563		0.937123	0.947724	0.982646	0.938627		0.946478	0.823629	0.884827	0.872828
		'99th percentile (all):'	1	1	1	0.947612	1	0.520324	0.950661	1	1	0.891539	1	1		1	1	0.861967	1		1	1	1	1
		'Lambda:'	0.825871	0.452299	0.576298	1.00004	0.00230636	0.110718	0.991616	0.912169	1.00361	1.02576	0.122173	0.257706		1.01127	1.03619	1.09227	1.03881		0.881452	0.741758	0.930169	1.12849
		'Sigma:'	1.46401	1.7311	1.46041	1.00332	7.12672	18.1245	4.12892	1.83304	1.37616	1.62469	1.31729	2.46206		1.34879	1.42534	1.83641	1.68856		1.77516	0.89418	1.33585	2.59458
		'Connectivity:'	0.869565	0.517241	0.645161	0.981617	0.0465116	0.133333	0.997167	0.84507	0.87761	0.84181	0.18	0.347826		0.991877	0.9122	0.836166	0.836881		0.84	0.833333	0.928571	0.962963
	Fq 5-10 NONastrocytes	'Cutoff:'	0.8	0.8		0.65	0.65	0.65	0.65	0.65	0.65	0.65	0.65	0.65		0.65	0.65	0.65	0.65		0.65	0.65	0.65	0.65
		'Number of correlations:'	290	36		1055	2	872	3382	42	698	663	2	226		7	89	607	350		73	1	6	32
		'Number of active cells:'	92	29		155	43	105	204	71	84	126	50	46		35	45	114	80		50	6	14	27
		'Mean correaltion (above cutoff):'	0.836234	0.849334		0.720592	0.701583	0.905285	0.753701	0.703838	0.899775	0.840211	0.686883	0.772514		0.713327	0.815387	0.835374	0.751928		0.754321	0.891335	0.839341	0.752196
		'Median correlation (above cutoff):'	0.829698	0.843372		0.710503	0.694023	0.905371	0.749264	0.694831	0.928388	0.854147	0.674839	0.771278		0.701631	0.840727	0.846927	0.743988		0.750035	0.894444	0.839744	0.746908
		'99th percentile:'	0.918116	0.930101		0.851813	0.822851	0.966475	0.897256	0.834938	0.986655	0.961395	0.781997	0.922214		0.860492	0.959917	0.962849	0.903379		0.90808	0.906707	0.945611	0.922888
		'99th percentile (all):'	1	1		0.895368	1	0.947743	0.84236	1	1	0.929408	1	1		1	1	0.939613	1		1	1	1	1
		'Lambda:'	0.946493	0.882173		0.98911	0.416625	1	1.00045	0.683684	1.03857	1.01454	0.255457	0.970054		0.902828	1.02624	1.00441	1.0529		0.898034	0.635294	1.23704	1.12807
		'Sigma:'	1.57167	1.23522		1.25581	1.63911	1	1.03379	3.31308	1.48263	1.52187	4.49133	1.09015		1.95148	1.28944	1.42647	1.55583		1.72382	0.781395	1.59408	1.76734
		'Connectivity:'	0.956522	0.896552		0.993548	0.534884	1	1	0.591549	1	1	0.24	0.978261		0.857143	1	1	0.9875		0.9	1	1	1
	Fq 10-15 NONastrocytes	'Cutoff:'		0.8	0.65	0.65	0.65	0.65	0.65	0.65	0.65	0.65	0.65									0.65	0.65	0.65
		'Number of correlations:'		36	488	2248	0	872	2679	250	735	577	31									1	11	2
		'Number of active cells:'		29	93	155	43	105	204	71	84	126	50									6	14	27
		'Mean correaltion (above cutoff):'		0.853814	0.720415	0.803107	0.681375	0.828153	0.721929	0.81684	0.8954	0.79447	0.741598									0.794397	0.811703	0.708142
		'Median correlation (above cutoff):'		0.848985	0.710042	0.802021	0.675337	0.826513	0.712356	0.827673	0.913021	0.798077	0.735232									0.78294	0.855467	0.726188
		'99th percentile:'		0.940777	0.872261	0.921496	0.761317	0.939209	0.864714	0.962514	0.977627	0.9319	0.900378									0.937207	0.93278	0.763981
		'99th percentile (all):'		1	1	0.927469	1	0.893054	0.819119	1	1	0.822273	1									1	1	1
		'Lambda:'		0.921147	1.00762	1	0.162265	1	0.999162	1.02971	1.01643	1.0324	0.657445									1.07692	1.13433	0.0985268
		'Sigma:'		1.29599	1.43563	1.00001	4.09063	1	1.13588	1.52527	1.44481	1.60907	2.40382									1.45778	1.2182	3.33333
		'Connectivity:'		0.931034	1	1	0.27907	1	1	1	1	1	0.6									1	1	0.259259
	Fq 15-20 NONastrocytes	'Cutoff:'	0.8	0.8						0.65	0.65	0.65	0.65									0.65	0.65	0.65
		'Number of correlations:'	742	72						473	760	671	4									1	9	39
		'Number of active cells:'	92	57						71	84	126	50									6	14	27
		'Mean correaltion (above cutoff):'	0.897999	0.832097						0.838853	0.886387	0.829284	0.694966									0.819676	0.824172	0.84278
		'Median correlation (above cutoff):'	0.898889	0.82835						0.855819	0.9067	0.85648	0.684805									0.892357	0.84166	0.882458
		'99th percentile:'	0.959051	0.884745						0.977045	0.980101	0.963856	0.772658									0.940125	0.906735	0.969456
		'99th percentile (all):'	1	1						1	1	0.900039	1									1	1	1
		'Lambda:'	1	0.544785						1.00148	1.00593	1.01226	0.0720629									0.571429	1.30526	1.0196
		'Sigma:'	1.00012	1.55225						1.00406	1.45117	1.37576	2.34861									Inf	2.10249	1.4864
		'Connectivity:'	1	0.614035						1	1	1	0.16									1	1	0.962963
	Fq 40-45 NONastrocytes	'Cutoff:'
		'Number of correlations:'
		'Number of active cells:'
		'Mean correaltion (above cutoff):'
		'Median correlation (above cutoff):'
		'99th percentile:'
		'99th percentile (all):'
		'Lambda:'
		'Sigma:'
		'Connectivity:'
	Fq 45-50 NONastrocytes	'Cutoff:'												0.65
		'Number of correlations:'												64
		'Number of active cells:'												46
		'Mean correaltion (above cutoff):'												0.69424
		'Median correlation (above cutoff):'												0.685665
		'99th percentile:'												0.793655
		'99th percentile (all):'												1
		'Lambda:'												0.74661
		'Sigma:'												1.6163
		'Connectivity:'												0.826087
NK1R+ cells	Fq 0-5 NK1R	'Cutoff:'			0.65	0.65		0.65	0.65	0.65	0.65	0.65		0.65			0.65	0.65	0.65		0.65	0.65	0.65	0.65									0.65	0.65	0.65	0.65	0.65	0.65	0.65	0.65	0.65	0.65	0.65
		'Number of correlations:'			2	166		3	98	1	2	4		0			1	7	5		1	0	1	0									0	2	6	2	0	6	3	0	1	2	0
		'Number of active cells:'			13	37		37	28	10	5	8		5			2	12	9		6	3	4	3									6	8	13	9	7	8	7	8	5	6	3
		'Mean correaltion (above cutoff):'			0.719831	0.815951		0.723775	0.874869	0.730608	0.904966	0.807927		0.803611			0.728861	0.861534	0.869843		0.804218	0.853817	0.72106	0.883977									0.705555	0.864331	0.861048	0.787196	0.715599	0.822352	0.757032	0.714242	0.900728	0.75293	0.928027
		'Median correlation (above cutoff):'			0.718079	0.815344		0.701842	0.876047	0.760457	0.937148	0.833251		0.779014			0.728861	0.926785	0.877001		0.818584	0.853817	0.72106	0.883977									0.686264	0.888168	0.872179	0.793698	0.706014	0.816833	0.797136	0.702906	0.900274	0.763688	0.928027
		'99th percentile:'			0.830394	0.92771		0.92073	0.948484	0.778798	0.94946	0.891639		0.898247			0.728861	0.981189	0.932526		0.910119	0.853817	0.72106	0.883977									0.748954	0.957949	0.976337	0.869481	0.735077	0.944978	0.850812	0.787699	0.967999	0.835249	0.928027
		'99th percentile (all):'			1	1		1	1	1	1	1		1			1	1	1		1	1	1	1									1	1	1	1	1	1	1	1	1	1	1
		'Lambda:'			0.384715	1		0.0356512	1	0.208073	1.09091	1.31765		0.426136			1	1.19212	1		0.595745	0.45	1	0.45									0.435835	1.14286	1.16552	1.19626	0.579539	1	1.14286	0.246914	1.04348	0.6	0.45
		'Sigma:'			1.75131	1		Inf	1	0	0.987342	1.26097		1.76471			NaN	1.60939	1		1.1831	0	NaN	0									0	1.26371	2.27796	1.44268	0	1.00353	0.97699	0	1.01654	1.4918	0
		'Connectivity:'			0.692308	1		0.162162	1	0.5	1	1		0.6			1	1	1		0.666667	0.666667	0.5	0.666667									0.833333	1	0.923077	1	0.571429	1	1	0.625	1	1	0.666667
	Fq 5-10 NK1R	'Cutoff:'				0.65	0.65	0.65	0.65	0.65	0.65	0.65		0.65	0.65	0.65	0.65	0.65	0.65		0.65	0.65	0.65	0.65									0.65	0.65	0.65	0.65	0.65	0.65	0.65	0.65	0.65	0.65	0.65
		'Number of correlations:'				85	0	139	93	2	4	4		1	1	0	0	10	6		1	0	1	0									2	3	24	6	4	7	2	2	6	1	0
		'Number of active cells:'				37	13	37	28	10	5	8		5	5	3	2	12	9		6	3	4	3									6	8	13	9	7	8	7	8	5	6	3
		'Mean correaltion (above cutoff):'				0.719345	0.822851	0.903768	0.739164	0.702043	0.873311	0.870315		0.769108	0.860457	0.834232	0.859966	0.797647	0.744992		0.807091	0.900145	0.874638	0.775739									0.846077	0.836296	0.853948	0.761787	0.80925	0.835069	0.79088	0.730959	0.823128	0.650631	0.665906
		'Median correlation (above cutoff):'				0.708842	0.822851	0.903273	0.732738	0.718118	0.895005	0.880508		0.787176	0.834944	0.834232	0.859966	0.796024	0.729147		0.819472	0.900145	0.888267	0.775739									0.897457	0.886737	0.940146	0.765393	0.849381	0.842105	0.812935	0.707253	0.848289	0.650631	0.665906
		'99th percentile:'				0.843967	0.822851	0.962631	0.864854	0.729527	0.93315	0.939047		0.787176	0.957074	0.834232	0.859966	0.917399	0.864869		0.868149	0.900145	0.90466	0.775739									0.935578	0.957475	0.980115	0.841249	0.907312	0.908707	0.854935	0.827052	0.91214	0.650631	0.665906
		'99th percentile (all):'				1	1	1	1	1	1	1		1	1	1	1	1	1		1	1	1	1									1	1	1	1	1	1	1	1	1	1	1
		'Lambda:'				0.987179	0.0283795	1	1.00355	0.377358	0.678733	1.05556		0.478469	0.620347	1	1	1.07772	0.919492		1	0.45	1.14286	1									1	1.18072	1.06103	0.88368	1.03448	1.47826	0.797721	0.552121	1.09091	1	0.45
		'Sigma:'				1.38054	NaN	1	1.02494	1.00999	1.17293	1.39829		0	0	NaN	NaN	1.07922	1.06822		1	0	0.777778	NaN									NaN	1.23321	1.14956	0.967087	1.41776	1.45944	0	1.23836	0.987342	NaN	0
		'Connectivity:'				1	0.153846	1	1	0.5	0.8	1		0.6	1	0.666667	1	1	0.888889		0.833333	0.666667	1	0.666667									1	1	1	0.777778	1	1	0.714286	0.875	1	0.333333	0.666667
	Fq 10-15 NK1R	'Cutoff:'			0.65	0.65	0.65	0.65	0.65	0.65	0.65	0.65	0.65									0.65	0.65										0.65	0.65	0.65	0.65				0.65	0.65	0.65	0.65
		'Number of correlations:'			16	166	0	139	79	13	4	2	0									0	1										2	5	3	8				1	3	8	0
		'Number of active cells:'			13	37	13	37	28	10	5	8	5									3	4										6	8	13	9				8	5	6	3
		'Mean correaltion (above cutoff):'			0.751139	0.802036	0.761317	0.819395	0.712578	0.858288	0.915306	0.784487	0.704333									0.885178	0.855365										0.900853	0.844916	0.707417	0.771694				0.796781	0.768309	0.837321	0.709851
		'Median correlation (above cutoff):'			0.754933	0.79753	0.761317	0.81561	0.707354	0.859431	0.93302	0.78089	0.704333									0.885178	0.852865										0.896838	0.864754	0.698477	0.785256				0.812716	0.71486	0.843196	0.709851
		'99th percentile:'			0.868418	0.927834	0.761317	0.941116	0.81702	0.957148	0.948681	0.854901	0.704333									0.885178	0.899613										0.944748	0.941164	0.761201	0.894704				0.860271	0.913011	0.961059	0.709851
		'99th percentile (all):'			1	1	1	1	1	1	1	1	1									1	1										1	1	1	1				1	1	1	1
		'Lambda:'			1.02564	1	0.0276144	1	1.00621	1.06897	0.811359	1	0.174216									1	1										0.622222	1.04878	0.210199	0.685569				1.06901	1	1.0303	0.45
		'Sigma:'			1.09694	1	NaN	1	1.12065	1.15126	0.893617	1	0									NaN	1										1.22513	1.3709	1.46341	0.998809				1.05822	1	1.01266	0
		'Connectivity:'			1	1	0.153846	1	1	1	0.8	1	0.4									0.666667	1										1	1	0.461538	0.777778				0.875	0.8	1	0.666667
	Fq 15-20 NK1R	'Cutoff:'								0.65	0.65	0.65										0.65	0.65	0.65									0.65	0.65	0.65	0.65				0.65	0.65	0.65	0.65
		'Number of correlations:'								17	5	3										1	0	1									6	4	16	7				0	3	5	0
		'Number of active cells:'								10	5	8										3	4	3									6	8	13	9				8	5	6	3
		'Mean correaltion (above cutoff):'								0.81709	0.846005	0.8582										0.847164	0.851044	0.843029									0.839422	0.848569	0.763928	0.741264				0.828301	0.812712	0.817331	0.809647
		'Median correlation (above cutoff):'								0.801478	0.820922	0.880202										0.819822	0.842584	0.843029									0.842739	0.846499	0.755997	0.738627				0.841556	0.881552	0.832345	0.819464
		'99th percentile:'								0.975345	0.926347	0.945915										0.922583	0.880898	0.843029									0.914609	0.962835	0.926748	0.837652				0.887811	0.89493	0.901078	0.819464
		'99th percentile (all):'								1	1	1										1	1	1									1	1	1	1				1	1	1	1
		'Lambda:'								1.02083	1	1.10811										1	0.6	1									1.19048	1.33333	1.11821	1				0.934066	1	1.15	1
		'Sigma:'								0.984933	1	1.19336										1	1.25	NaN									0.822029	2.04207	1.47507	1				Inf	1	1.15078	NaN
		'Connectivity:'								1	1	1										1	0.75	0.666667									1	1	0.923077	0.888889				0.625	1	1	1
	Fq 40-45 NK1R	'Cutoff:'																																			0.65	0.65	0.65
		'Number of correlations:'																																			1	2	2
		'Number of active cells:'																																			7	8	7
		'Mean correaltion (above cutoff):'																																			0.826592	0.699367	0.829923
		'Median correlation (above cutoff):'																																			0.820934	0.693724	0.877786
		'99th percentile:'																																			0.886387	0.811599	0.901414
		'99th percentile (all):'																																			1	1	1
		'Lambda:'																																			1.28358	0.498442	1.12477
		'Sigma:'																																			0.944675	1.07143	0.959711
		'Connectivity:'																																			1	1	0.857143
	Fq 45-50 NK1R	'Cutoff:'																																			0.65	0.65
		'Number of correlations:'																																			2	7
		'Number of active cells:'																																			7	8
		'Mean correaltion (above cutoff):'																																			0.745969	0.718842
		'Median correlation (above cutoff):'																																			0.739696	0.707766
		'99th percentile:'																																			0.863944	0.814301
		'99th percentile (all):'																																			1	1
		'Lambda:'																																			1.04918	1.47619
		'Sigma:'																																			1.52113	1.35614
		'Connectivity:'																																			1	1

## Sheet: Statistics
	MrgA1								WT											MrgA1		WT
		preBötC			pFRG				preBötC			pFRG					preBötC	pFRG		preBötC	pFRG	preBötC	pFRG
		Mean	SD	SEM	Mean	SD	SEM		Mean	SD	SEM	Mean	SD	SEM			MrgA1 vs WT			Control vs FLRF		Control vs FLRF
Control	Correlations	492.952	94.8927	20.7073	133.714	48.9267	10.6767		497.652	110.488	23.0383	121.267	38.0797	9.83213		Correlations	0.883664	0.429255	Correlations	0.902621	0.371535	0.437367	0.245782
	Lambda	0.819498	0.187855	0.0409932	0.842994	0.215559	0.0470388		0.766099	0.304874	0.0635707	0.761066	0.175009	0.0451872		Lambda	0.502895	0.246367	Lambda	0.928886	0.882019	0.726432	0.132422
	Sigma	2.86506	1.43215	0.31252	2.46538	1.67021	0.364469		2.39259	1.85313	0.386404	2.20273	1.78578	0.461087		Sigma	0.363725	0.663323	Sigma	0.915107	0.250176	0.998246	0.789854
	Connectivity	0.639597	0.299002	0.0652476	0.66009	0.278831	0.0608459		0.685918	0.325771	0.0679279	0.756635	0.245801	0.0634655		Connectivity	0.634695	0.30336	Connectivity	0.342023	0.252934	0.800607	0.88836
	Small world	3.57028	1.59107	0.347199	3.55421	3.84793	0.232039		5.30682	6.2618	1.30568	3.08715	2.57559	0.665014		Small world	0.234346	0.693377	Small World	0.961274	0.275724	0.19882	0.526404
FLRF	Correlations	488.85	112.748	25.2111	149.8	61.733	13.8039		472.455	99.714	21.2591	142.357	53.4731	14.2913		Correlations	0.628205	0.725386
	Lambda	0.814118	0.186025	0.0415964	0.852825	0.194219	0.0434288		0.739225	0.175521	0.0374212	0.868749	0.185623	0.0496099		Lambda	0.197708	0.817674
	Sigma	2.92801	2.17302	0.485902	1.87747	1.46221	0.326961		2.39377	1.63735	0.349084	2.04252	1.23729	0.330679		Sigma	0.382553	0.740246
	Connectivity	0.720443	0.217332	0.0485968	0.750228	0.197219	0.0440995		0.706934	0.198374	0.0422934	0.767717	0.143776	0.0384257		Connectivity	0.838203	0.785224
	Small world	3.6007	2.25477	0.504181	2.46172	1.99049	0.445087		3.40738	2.359	0.502939	2.5429	1.71303	0.457827		Small world	0.792864	0.905116
All cells	Correlations	492.952	94.8927	20.7073	133.714	48.9267	10.6767
Astrocytes	Correlations	79.3249			49.4743
Non-astrocytes	Correlations	297.249			39.8032
Astrocytes-non-astrocytes		116.379			44.4368
		0			0
		16.0918			37
		60.2997			29.7674
		23.6085			33.2326
