# Supplementary material for: Astrocytes release prostaglandin E2 to modify respiratory network activity
Source: eLife. 2017 Oct 6;6:e29566. doi: 10.7554/eLife.29566 (PMC5648524; doi:10.7554/eLife.29566)
Supplement: Figure 2—source data 3. [file elife-29566-fig2-data3.xlsx]

## Sheet: preBötC
ID	Strain	Age	DIV	Lens	Region	MrgA1	Image interval	Duration (min)	Exposure time	Protocol	ROI	Measured	Analyzed	Number of active cells	Number of astrocytes	Number of active astrocytes	Number of non-active astrocytes	Number of active non-astrocytes	Number of NK1R positive cells	% active astrocytes of astrocytes	% neurons of all cells	% astrocytes of active cells	% non-astrocytes of active cells	% NK1R of active cells
161020_01-1	MrgA1	P3	7	20x1,0z	preBötC	YES	0,5s	20	100ms	Control 5 min, FLRF 5 min, Control 9 min, High potassium 1 min	x	x	5 min interval	138	150	19	131	119	1	12.6667	52.0833	13.7681	86.2319	0.724638
161020_03-1	MrgA1	P3	7	20x1,0z	preBötC	YES	0,5s	20	100ms	Control 5 min, FLRF 5 min, Control 9 min, High potassium 1 min	x	x	5 min interval	183	141	27	114	156	3	19.1489	43.5185	14.7541	85.2459	1.63934
161020_03-2	MrgA1	P3	7	20x1,0z	preBötC	YES	0,5s	20	100ms	Control 5 min, FLRF 5 min, Control 9 min, High potassium 1 min	x	x	5 min interval	181	167	38	129	143	2	22.7545	47.9885	20.9945	79.0055	1.10497
161021_02-1	MrgA1	P3	8	20x1,0z	preBötC	YES	0,5s	20	100ms	Control 5 min, FLRF 5 min, Control 9 min, High potassium 1 min	x	x	5 min interval	123	155	14	141	109	2	9.03226	55.7554	11.3821	88.6179	1.62602
161121_01-1	MrgA1	P3	7	20x1,0z	preBötC	YES	0,5s	2x10	100ms	Control 5 min, FLRF 5 min + Control 10 min	x	x	5 min interval	156	390	36	354	120	6	9.23077	71.4286	23.0769	76.9231	3.84615
161121_04-1	MrgA1	P3	7	20x1,0z	preBötC	YES	0,5s	2x10	100ms	Control 5 min, FLRF 5 min + Control 10 min	x	x	5 min interval	167	113	17	96	150	8	15.0442	40.3571	10.1796	89.8204	4.79042
161124_02-1	MrgA1	P3	10	20x1,0z	preBötC	YES	0,5s	2x10	100ms	Control 5 min, FLRF 5 min + Control 10 min	x	x	5 min interval	79	280	33	247	46	9	11.7857	77.9944	41.7722	58.2278	11.3924
161124_03-1	MrgA1	P3	10	20x1,0z	preBötC	YES	0,5s	2x10	100ms	Control 5 min, FLRF 5 min + Control 10 min	x	x	5 min interval	160	181	45	136	115	31	24.8619	53.0792	28.125	71.875	19.375
161124_04-1	MrgA1	P3	10	20x1,0z	preBötC	YES	0,5s	2x10	100ms	Control 5 min, FLRF 5 min + Control 10 min	x	x	5 min interval	251	313	82	231	169	16	26.1981	55.4965	32.6693	67.3307	6.3745
161124_05-1	MrgA1	P3	10	20x1,0z	preBötC	YES	0,5s	2x10	100ms	Control 5 min, FLRF 5 min + Control 10 min	x	x	5 min interval	183	276	69	207	114	15	25	60.1307	37.7049	62.2951	8.19672
161124_06-1	MrgA1	P3	10	20x1,0z	preBötC	YES	0,5s	2x10	100ms	Control 5 min, FLRF 5 min + Control 10 min	x	x	5 min interval	131	207	16	191	115	6	7.72947	61.2426	12.2137	87.7863	4.58015
161128_01-1	MrgA1	P3	14	20x1,0z	preBötC	YES	0,5s	2x10	100ms	Control 5 min, FLRF 5 min + Control 10 min	x	x	5 min interval	140	358	10	348	130	6	2.7933	71.8876	7.14286	92.8571	4.28571
161128_02-1	MrgA1	P3	14	20x1,0z	preBötC	YES	0,5s	2x10	100ms	Control 5 min, FLRF 5 min + Control 10 min	x	x	5 min interval	182	152	15	137	167	11	9.86842	45.509	8.24176	91.7582	6.04396
161128_03-1	MrgA1	P3	14	20x1,0z	preBötC	YES	0,5s	2x10	100ms	Control 5 min, FLRF 5 min + Control 10 min	x	x	5 min interval	135	202	12	190	123	6	5.94059	59.9407	8.88889	91.1111	4.44444
170124_03-1	MrgA1	P3	7	20x1,0z	preBötC	YES	0,5s	20	100ms	Control 5 min, FLRF 5 min, Control 9 min, High potassium 1 min	x	x	5 min interval	120	181	35	146	85	7	19.337	60.1329	29.1667	70.8333	5.83333
170124_05-1	MrgA1	P3	7	20x1,0z	preBötC	YES	0,5s	20	100ms	Control 5 min, FLRF 5 min, Control 9 min, High potassium 1 min	x	x	5 min interval	149	349	36	313	113	8	10.3152	70.0803	24.1611	75.8389	5.36913
170202_01-1	MrgA1	P3	14	20x1,0z	preBötC	YES	0,5s	20	100ms	Control 5 min, FLRF 5 min, CO2 10 min	x	x	5 min interval	173	236	29	207	144	5	12.2881	57.7017	16.763	83.237	2.89017
170202_02-1	MrgA1	P3	14	20x1,0z	preBötC	YES	0,5s	20	100ms	Control 5 min, FLRF 5 min, CO2 10 min	x	x	5 min interval	79	392	15	377	64	17	3.82653	83.2272	18.9873	81.0127	21.519
170202_03-1	MrgA1	P3	14	20x1,0z	preBötC	YES	0,5s	20	100ms	Control 5 min, FLRF 5 min, CO2 10 min	x	x	5 min interval	128	256	27	229	101	9	10.5469	66.6667	21.0938	78.9062	7.03125
170202_04-1	MrgA1	P3	14	20x1,0z	preBötC	YES	0,5s	20	100ms	Control 5 min, FLRF 5 min, CO2 10 min	x	x	5 min interval	133	302	24	278	109	22	7.94702	69.4253	18.0451	81.9549	16.5414
170202_05-1	MrgA1	P3	14	20x1,0z	preBötC	YES	0,5s	20	100ms	Control 5 min, FLRF 5 min, CO2 10 min	x	x	5 min interval	124	296	21	275	103	11	7.09459	70.4762	16.9355	83.0645	8.87097
170202_06-1	MrgA1	P3	14	20x1,0z	preBötC	YES	0,5s	20	100ms	Control 5 min, FLRF 5 min, CO2 10 min	x	x	5 min interval	86	293	21	272	65	13	7.16724	77.3087	24.4186	75.5814	15.1163
														145.5	245	29.1364	215.864	116.364	9.72727	12.7535	61.4287	20.022	79.978	7.34527
														38.7061	83.3852	17.4988	81.9758	31.3478	6.97516	6.90948	11.4852	9.2833	9.2833	5.76433
																			87.2465
161020_02-1	MrgA1	P3	7	20x1,0z	preBötC	NO	0,5s	20	100ms	Control 5 min, FLRF 5 min, Control 4 min, High potassium 1 min	x	x	5 min interval	167	na	na		na	na			na	na	na
161021_01-1	MrgA1	P3	8	20x1,0z	preBötC	NO	0,5s	20	100ms	Control 5 min, FLRF 5 min, Control 4 min, High potassium 1 min	x	x	5 min interval	106	na	na		na	na			na	na	na
161025_01-1	C57bl6	P3	7	20x1,0z	preBötC	NO	0,5s	20	100ms	Control 5 min, FLRF 5 min, Control 4 min, High potassium 1 min	x	x	5 min interval	130	na	na		na	na			na	na	na
161025_02-1	C57bl6	P3	7	20x1,0z	preBötC	NO	0,5s	20	100ms	Control 5 min, FLRF 5 min, Control 4 min, High potassium 1 min	x	x	5 min interval	171	na	na		na	na			na	na	na
161025_03-1	C57bl6	P3	7	20x1,0z	preBötC	NO	0,5s	20	100ms	Control 5 min, FLRF 5 min, Control 4 min, High potassium 1 min	x	x	5 min interval	116	na	na		na	na			na	na	na
161025_04-1	C57bl6	P3	7	20x1,0z	preBötC	NO	0,5s	20	100ms	Control 5 min, FLRF 5 min, Control 4 min, High potassium 1 min	x	x	5 min interval	195	na	na		na	na			na	na	na
161028_01-1	MrgA1	P3	14	20x1,0z	preBötC	NO	0,5s	20	100ms	Control 5 min, FLRF 5 min, Control 4 min, High potassium 1 min	x	x	5 min interval	166	na	na		na	na			na	na	na
161028_02-1	MrgA1	P3	14	20x1,0z	preBötC	NO	0,5s	20	100ms	Control 5 min, FLRF 5 min, Control 4 min, High potassium 1 min	x	x	5 min interval	115	na	na		na	na			na	na	na
161028_03-1	MrgA1	P3	14	20x1,0z	preBötC	NO	0,5s	20	100ms	Control 5 min, FLRF 5 min, Control 4 min, High potassium 1 min	x	x	5 min interval	139	na	na		na	na			na	na	na
161031_05-1	C57bl6	P3	13	20x1,0z	preBötC	NO	0,5s	20	100ms	Control 5 min, FLRF 5 min, Control 4 min, High potassium 1 min	x	x	5 min interval	77	na	na		na	na			na	na	na
161031_06-1	C57bl6	P3	13	20x1,0z	preBötC	NO	0,5s	20	100ms	Control 5 min, FLRF 5 min, Control 4 min, High potassium 1 min	x	x	5 min interval	194	na	na		na	na			na	na	na
161121_02-1	MrgA1	P3	7	20x1,0z	preBötC	NO	0,5s	2x10	100ms	Control 5 min, FLRF 5 min + Control 10 min	x	x	5 min interval	174	na	na		na	6			na	na	3.44828
170124_01-1	MrgA1	P3	7	20x1,0z	preBötC	NO	0,5s	20	100ms	Control 5 min, FLRF 5 min, Control 9 min, High potassium 1 min	x	x	5 min interval	91	na	na		na	24			na	na	26.3736
170124_02-1	MrgA1	P3	7	20x1,0z	preBötC	NO	0,5s	20	100ms	Control 5 min, FLRF 5 min, Control 9 min, High potassium 1 min	x	x	5 min interval	210	na	na		na	4			na	na	1.90476
170124_04-1	MrgA1	P3	7	20x1,0z	preBötC	NO	0,5s	20	100ms	Control 5 min, FLRF 5 min, Control 9 min, High potassium 1 min	x	x	5 min interval	96	na	na		na	4			na	na	4.16667
170131_01-1	MrgA1	P3	14	20x1,0z	preBötC	NO	0,5s	2x10	100ms	Control 5 min, FLRF 5 min + Control 10 min	x	x	5 min interval	136	na	na		na	3			na	na	2.20588
170131_02-1	MrgA1	P3	14	20x1,0z	preBötC	NO	0,5s	2x10	100ms	Control 5 min, FLRF 5 min + Control 10 min	x	x	5 min interval	120	na	na		na	9			na	na	7.5
170131_03-1	MrgA1	P3	14	20x1,0z	preBötC	NO	0,5s	2x10	100ms	Control 5 min, FLRF 5 min + Control 10 min	x	x	5 min interval	170	na	na		na	25			na	na	14.7059
170209_01-1	C57bl6	P3	9	20x1,0z	preBötC	NO	0,5s	20	100ms	Control 5 min, FLRF 5 min, CO2 10 min	x	x	5 min interval	116	na	na		na	6			na	na	5.17241
170209_02-1	C57bl6	P3	9	20x1,0z	preBötC	NO	0,5s	20	100ms	Control 5 min, FLRF 5 min, CO2 10 min	x	x	5 min interval	159	na	na		na	6			na	na	3.77358
170209_03-1	C57bl6	P3	9	20x1,0z	preBötC	NO	0,5s	20	100ms	Control 5 min, FLRF 5 min, CO2 10 min	x	x	5 min interval	152	na	na		na	7			na	na	4.60526
170209_04-1	C57bl6	P3	9	20x1,0z	preBötC	NO	0,5s	20	100ms	Control 5 min, FLRF 5 min, CO2 10 min	x	x	5 min interval	77	na	na		na	8			na	na	10.3896
170209_05-1	C57bl6	P3	9	20x1,0z	preBötC	NO	0,5s	20	100ms	Control 5 min, FLRF 5 min, CO2 10 min	x	x	5 min interval	152	na	na		na	9			na	na	5.92105
														140.391	#DIV/0!	#DIV/0!		#DIV/0!	9.25			#DIV/0!	#DIV/0!	7.51392
														37.086	#DIV/0!	#DIV/0!		#DIV/0!	7.06075			#DIV/0!	#DIV/0!	6.66786
																								na
																								na
																								na
																								na
																								na
Excluded
161020_04-1	MrgA1	P3	7	20x1,0z	preBötC	YES	0,5s	20	100ms	Control 5 min, FLRF 5 min, Control 4 min, High potassium 1 min	x	x		0	149	0	0	0
161121_03-1	MrgA1	P3	7	20x1,0z	preBötC	YES	0,5s	2x10	100ms	Control 5 min, FLRF 5 min + Control 10 min	x	x		0	268	0	0	0
161124_01-1	MrgA1	P3	10	20x1,0z	preBötC	YES	0,5s	2x10	100ms	Control 5 min, FLRF 5 min + Control 10 min	x	x			277
161018_01-1	EP3RKO	P3	21	20x1,0z	preBötC	NO	0,5s	20	100ms	Control 5 min, FLRF 5 min, Control 9 min, High potassium 1 min	x	x	Need to be re-measured	38	na	na	na	na		na		na
161018_02-1	EP3RKO	P3	21	20x1,0z	preBötC	NO	0,5s	20	100ms	Control 5 min, FLRF 5 min, Control 9 min, High potassium 1 min	x	x	5 min interval	26	na	na	na	na		na		na
161018_03-1	EP3RKO	P3	21	20x1,0z	preBötC	NO	0,5s	20	100ms	Control 5 min, FLRF 5 min, Control 9 min, High potassium 1 min	x	x	5 min interval	60	na	na	na	na		na		na
161018_04-1	EP3RKO	P3	21	20x1,0z	preBötC	NO	0,5s	20	100ms	Control 5 min, FLRF 5 min, Control 9 min, High potassium 1 min	x	x	5 min interval	46	na	na	na	na		na		na

## Sheet: pFRG
ID	Strain	Age	DIV	Lens	Region	MrgA1	Image interval	Duration (min)	Exposure time	Protocol	ROI	Measured	Analyzed	Number of active cells	Number of astrocytes	Number of active astrocytes	Number of inactive astrocytes	Number of active non-astrocytes	Number of NK1R positive cells	% active astrocytes of astrocytes	% neurons of all cells	% astrocytes of active cells	% non-astrocytes of active cells	% NK1R of active cells
161027_01-1	MrgA1	P3	14	20x1,0z	pFRG	YES	0,5s	20	100ms	Control 5 min, FLRF 5 min, FLRF 9 min, High potassium 1 min	x	x	5 min interval	115	155	30	125	85	na	19.3548	57.4074	26.087	73.913	na
161027_02-1	MrgA1	P3	14	20x1,0z	pFRG	YES	0,5s	20	100ms	Control 5 min, FLRF 5 min, FLRF 9 min, High potassium 1 min	x	x	5 min interval	78	240	57	183	21	na	23.75	75.4717	73.0769	26.9231	na
161125_01-1	MrgA1	P3	11	20x1,0z	pFRG	YES	0,5s	15	100ms	Control 5 min, FLRF 5 min, CO2 5 min	x	x	5 min interval	122	204	50	154	93	13	24.5098	62.5767	40.9836	76.2295	10.6557
161125_02-1	MrgA1	P3	11	20x1,0z	pFRG	YES	0,5s	15	100ms	Control 5 min, FLRF 5 min, CO2 5 min	x	x	5 min interval	216	296	81	215	155	37	27.3649	57.8125	37.5	71.7593	17.1296
161125_03-1	MrgA1	P3	11	20x1,0z	pFRG	YES	0,5s	15	100ms	Control 5 min, FLRF 5 min, CO2 5 min	x	x	5 min interval	69	293	33	260	43	13	11.2628	80.9392	47.8261	62.3188	18.8406
161125_04-1	MrgA1	P3	11	20x1,0z	pFRG	YES	0,5s	15	100ms	Control 5 min, FLRF 5 min, CO2 5 min	x	x	5 min interval	125	212	27	185	105	37	12.7358	62.908	21.6	84	29.6
161125_05-1	MrgA1	P3	11	20x1,0z	pFRG	YES	0,5s	15	100ms	Control 5 min, FLRF 5 min, CO2 5 min	x	x	5 min interval	265	205	121	84	204	28	59.0244	43.617	45.6604	76.9811	10.566
170123_01-1	MrgA1	P3	6	20x1,0z	pFRG	YES	0,5s	15	100ms	Control 5 min, FLRF 5 min, Control 9 min, High potassium 1 min	x	x	5 min interval	108	337	37	300	71	10	10.9792	75.7303	34.2593	65.7407	9.25926
170123_03-1	MrgA1	P3	6	20x1,0z	pFRG	YES	0,5s	15	100ms	Control 5 min, FLRF 5 min, Control 9 min, High potassium 1 min	x	x	5 min interval	148	141	64	77	84	5	45.3901	48.7889	43.2432	56.7568	3.37838
170123_05-1	MrgA1	P3	6	20x1,0z	pFRG	YES	0,5s	15	100ms	Control 5 min, FLRF 5 min, Control 9 min, High potassium 1 min	x	x	5 min interval	208	308	82	226	126	8	26.6234	59.6899	39.4231	60.5769	3.84615
170123_08-1	MrgA1	P3	6	20x1,0z	pFRG	YES	0,5s	15	100ms	Control 5 min, FLRF 5 min, Control 9 min, High potassium 1 min	x	x	5 min interval	78	242	28	214	50	5	11.5702	75.625	35.8974	64.1026	6.41026
170126_02-1	MrgA1	P3	7	20x1,0z	pFRG	YES	0,5s	10	100ms	Control 5 min, FLRF 5 min + control 10 min	x	x	5 min interval	109	294	46	248	63	5	15.6463	72.9529	42.2018	57.7982	4.58716
170126_03-1	MrgA1	P3	7	20x1,0z	pFRG	YES	0,5s	10	100ms	Control 5 min, FLRF 5 min + control 10 min	x	x	5 min interval	66	224	27	197	39	5	12.0536	77.2414	40.9091	59.0909	7.57576
170126_04-1	MrgA1	P3	7	20x1,0z	pFRG	YES	0,5s	10	100ms	Control 5 min, FLRF 5 min + control 10 min	x	x	5 min interval	57	307	22	285	35	3	7.16612	84.3407	38.5965	61.4035	5.26316
170127_01-1	MrgA1	P3	7	20x1,0z	pFRG	YES	0,5s	10	100ms	Control 5 min, FLRF 5 min + control 10 min	x	x	5 min interval	91	298	46	252	45	2	15.4362	76.6067	50.5495	49.4505	2.1978
170127_02-1	MrgA1	P3	7	20x1,0z	pFRG	YES	0,5s	10	100ms	Control 5 min, FLRF 5 min + control 10 min	x	x	5 min interval	138	206	24	182	114	12	11.6505	59.8837	17.3913	82.6087	8.69565
170127_03-1	MrgA1	P3	7	20x1,0z	pFRG	YES	0,5s	10	100ms	Control 5 min, FLRF 5 min + control 10 min	x	x	5 min interval	134	271	54	217	80	9	19.9262	66.9136	40.2985	59.7015	6.71642
170127_04-1	MrgA1	P3	7	20x1,0z	pFRG	YES	0,5s	10	100ms	Control 5 min, FLRF 5 min + control 10 min	x	x	5 min interval	37	242	8	234	29	9	3.30579	86.7384	21.6216	78.3784	24.3243
170130_02-1	MrgA1	P3	7	20x1,0z	pFRG	YES	0,5s	10	100ms	Control 5 min, FLRF 5 min + control 10 min	x	x	5 min interval	95	252	45	207	50	6	17.8571	72.6225	47.3684	52.6316	6.31579
170203_02-1	MrgA1	P3	7	20x1,0z	pFRG	YES	0,5s	15	100ms	Control 5 min, FLRF 5 min, CO2 10 min	x	x	5 min interval	14	340	8	332	6	3	2.35294	96.0452	57.1429	42.8571	21.4286
170203_03-1	MrgA1	P3	7	20x1,0z	pFRG	YES	0,5s	15	100ms	Control 5 min, FLRF 5 min, CO2 10 min	x	x	5 min interval	29	351	15	336	14	4	4.2735	92.3684	51.7241	48.2759	13.7931
170203_04-1	MrgA1	P3	7	20x1,0z	pFRG	YES	0,5s	15	100ms	Control 5 min, FLRF 5 min, CO2 10 min	x	x	5 min interval	38	69	11	58	27	3	15.942	64.486	28.9474	71.0526	7.89474
														106.364	249.409	41.6364	207.773	69.9545	10.85	18.0989	70.4894	40.1049	62.8432	10.9239
														61.4695	68.496	26.9166	73.9631	47.7117	10.3888	12.9656	13.1289	12.3635	13.5136	7.38627
																				81.9011
																					1
161027_03-1	MrgA1	P3	14	20x1,0z	pFRG	NO	0,5s	20	100ms	Control 5 min, FLRF 5 min, Control 9 min, High potassium 1 min	x	x	5 min interval	143	na	na		na	na			na	na	na
161031_01-1	C57bl6	P3	13	20x1,0z	pFRG	NO	0,5s	20	100ms	Control 5 min, FLRF 5 min, Control 9 min, High potassium 1 min	x	x	5 min interval	68	na	na		na	na			na	na	na
161031_02-1	C57bl6	P3	13	20x1,0z	pFRG	NO	0,5s	20	100ms	Control 5 min, FLRF 5 min, Control 9 min, High potassium 1 min	x	x	5 min interval	61	na	na		na	na			na	na	na
161031_03-1	C57bl6	P3	13	20x1,0z	pFRG	NO	0,5s	20	100ms	Control 5 min, FLRF 5 min, Control 9 min, High potassium 1 min	x	x	5 min interval	68	na	na		na	na			na	na	na
161031_04-1	C57bl6	P3	13	20x1,0z	pFRG	NO	0,5s	20	100ms	Control 5 min, FLRF 5 min, Control 9 min, High potassium 1 min	x	x	5 min interval	188	na	na		na	na			na	na	na
170123_02-1	MrgA1	P3	6	20x1,0z	pFRG	NO	0,5s	20	100ms	Control 5 min, FLRF 5 min, Control 9 min, High potassium 1 min	x	x	5 min interval	129	na	na		na	6			na	na	4.65116
170123_04-1	MrgA1	P3	6	20x1,0z	pFRG	NO	0,5s	20	100ms	Control 5 min, FLRF 5 min, Control 9 min, High potassium 1 min	x	x	5 min interval	50	na	na		na	8			na	na	16
170123_06-1	MrgA1	P3	6	20x1,0z	pFRG	NO	0,5s	20	100ms	Control 5 min, FLRF 5 min, Control 9 min, High potassium 1 min	x	x	5 min interval	80	na	na		na	13			na	na	16.25
170123_07-1	MrgA1	P3	6	20x1,0z	pFRG	NO	0,5s	20	100ms	Control 5 min, FLRF 5 min, Control 9 min, High potassium 1 min	x	x	5 min interval	200	na	na		na	9			na	na	4.5
170126_01-1	MrgA1	P3	7	20x1,0z	pFRG	NO	0,5s	10	100ms	Control 5 min, FLRF 5 min + control 10 min	x	x	5 min interval	96	na	na		na	7			na	na	7.29167
170130_01-1	MrgA1	P3	7	20x1,0z	pFRG	NO	0,5s	10	100ms	Control 5 min, FLRF 5 min + control 10 min	x	x	5 min interval	73	na	na		na	8			na	na	10.9589
170130_03-1	MrgA1	P3	7	20x1,0z	pFRG	NO	0,5s	10	100ms	Control 5 min, FLRF 5 min + control 10 min	x	x	5 min interval	37	na	na		na	7			na	na	18.9189
170207_01-1	MrgA1	P3	7	20x1,0z	pFRG	NO	0,5s	20	100ms	Control 5 min, FLRF 5 min, CO2 10 min	x	x	5 min interval	103	na	na		na	8			na	na	7.76699
170207_02-1	MrgA1	P3	7	20x1,0z	pFRG	NO	0,5s	20	100ms	Control 5 min, FLRF 5 min, CO2 10 min	x	x	5 min interval	41	na	na		na	5			na	na	12.1951
170207_03-1	MrgA1	P3	7	20x1,0z	pFRG	NO	0,5s	20	100ms	Control 5 min, FLRF 5 min, CO2 10 min	x	x	5 min interval	138	na	na		na	6			na	na	4.34783
170207_04-1	MrgA1	P3	7	20x1,0z	pFRG	NO	0,5s	20	100ms	Control 5 min, FLRF 5 min, CO2 10 min	x	x	5 min interval	8	na	na		na	3			na	na	37.5
														92.6875	#DIV/0!	#DIV/0!		#DIV/0!	7.27273			#DIV/0!	#DIV/0!	12.7619
														52.5354	#DIV/0!	#DIV/0!		#DIV/0!	2.41551			#DIV/0!	#DIV/0!	9.22358
Excluded
161027_02-2	MrgA1	P3	14	20x1,0z	pFRG	YES	0,5s	20	100ms	Control 5 min, FLRF 14 min, High potassium 1 min	x	x	5 min interval	12	113	0	12	0		0		100
170203_01-1	MrgA1	P3	7	20x1,0z	pFRG	YES	0,5s	10	100ms	Control 5 min, FLRF 5 min, CO2 10 min				0
161125_06-1	MrgA1	P3	11	20x1,0z	pFRG	NO	0,5s	15	100ms	Control 5 min, FLRF 5 min, CO2 5 min	x	x	5 min interval	43	na	na	na	13		na		na
