# Supplementary material for: Astrocytes release prostaglandin E2 to modify respiratory network activity
Source: eLife. 2017 Oct 6;6:e29566. doi: 10.7554/eLife.29566 (PMC5648524; doi:10.7554/eLife.29566)
Supplement: Figure 4—source data 1. [file elife-29566-fig4-data1.xlsx]

## Sheet: PGE2 Elisa
Plate 1	1	2	3	4	5	6	7	8	9	10	11	12					Plate 1	1	2	3	4	5	6	7	8	9	10	11	12		1	2	3	4	5	6	7	8	9	10	11	12
A	0.073	0.079	0.171	0.166	0.267	0.285	0.167	0.161	0.166	0.183	0.223	0.18		NSB	0.0686667		A		0.0235562	0.233283	0.221884	0.452128	0.493161	0.224164	0.210486	0.221884	0.260638	0.351824	0.253799			1002.07	24.678	25.076	23.6232	23.6163	24.9843	25.6552	25.076	24.139	23.6869	24.2362
B	0.074	0.085	0.192	0.136	0.226	0.264	0.133	0.137	0.187	0.206	0.184	0.174		B0	0.507333		B		0.037234	0.281155	0.153495	0.358663	0.445289	0.146657	0.155775	0.269757	0.31307	0.262918	0.240122			994.291	23.9367	38.4475	23.6777	23.6249	43.2963	37.1468	24.0352	23.7741	24.1106	24.4996
C	0.078	0.09	0.156	0.168	0.174	0.163	0.124	0.136	0.147	0.156	0.19	0.18		Corrected maximum binding:	0.438667		C		0.0486322	0.199088	0.226444	0.240122	0.215046	0.12614	0.153495	0.178571	0.199088	0.276596	0.253799			959.635	26.5154	24.8991	24.4996	25.3964	73.0133	38.4475	29.3694	26.5154	23.9726	24.2362
D	0.011	0.101	0.173	0.179	0.181	0.191	0.203	0.184	0.132	0.126	0.193	0.182		%Bound:	0.13841		D		0.0737082	0.237842	0.25152	0.256079	0.278875	0.306231	0.262918	0.144377	0.130699	0.283435	0.258359			623.127	24.5549	24.2731	24.2017	23.9541	23.7992	24.1106	45.298	63.4956	23.9203	24.1693
E	0.044	0.126	0.158	0.178	0.178	0.174	0.177	0.177	0.139	0.132	0.143	0.166					E		0.130699	0.203647	0.24924	0.24924	0.240122	0.24696	0.24696	0.160334	0.144377	0.169453	0.221884			63.4956	26.1289	24.3125	24.3125	24.4996	24.3546	24.3546	34.9183	45.298	31.6113	25.076
F	0.464	0.136	0.171	0.167	0.173	0.179	0.169	0.163	0.177	0.206	0.139	0.125					F		0.153495	0.233283	0.224164	0.237842	0.25152	0.228723	0.215046	0.24696	0.31307	0.160334	0.128419			38.4475	24.678	24.9843	24.5549	24.2731	24.82	25.3964	24.3546	23.7741	34.9183	67.9701
G	0.487	0.199	0.206	0.168	0.188	0.18	0.161	0.159	0.181	0.188	0.132	0.131					G		0.297112	0.31307	0.226444	0.272036	0.253799	0.210486	0.205927	0.256079	0.272036	0.144377	0.142097			23.8396	23.7741	24.8991	24.013	24.2362	25.6552	25.9582	24.2017	24.013	45.298	47.5348
H	3.173	0.228	0.377	0.338	0.164	0.169	0.208	0.177	0.177	0.201	0.152	0.141					H		0.363222	0.702888	0.613982	0.217325	0.228723	0.317629	0.24696	0.24696	0.301672	0.18997	0.164894			23.6723	23.6078	23.6092	25.2814	24.82	23.7595	24.3546	24.3546	23.8183	27.5133	33.1009
Plate 2	1	2	3	4	5	6	7	8	9	10	11	12					Plate 2	1	2	3	4	5	6	7	8	9	10	11	12		1	2	3	4	5	6	7	8	9	10	11	12
A	0.073	0.082	0.3	0.283	0.13	0.171	0.186	0.183	0.274	0.25	0.239	0.227		S1	0.031155	1000	A		0.0303951	0.527356	0.488602	0.139818	0.233283	0.267477	0.260638	0.468085	0.413374	0.388298	0.360942			1000.23	23.613	23.6168	50.0377	24.678	24.0588	24.139	23.62	23.6357	23.6498	23.6749
B	0.085	0.098	0.297	0.275	0.289	0.341	0.318	0.211	0.228	0.265	0.262	0.218		S2	0.0797872	500	B		0.0668693	0.520517	0.470365	0.50228	0.620821	0.568389	0.324468	0.363222	0.447568	0.440729	0.340426			752.939	23.6135	23.6196	23.6152	23.609	23.6106	23.7403	23.6723	23.6243	23.6261	23.7054
C	0.086	0.131	0.267	0.262	0.267	0.306	0.137	0.128	0.124	0.149	0.222	0.223		S3	0.0980243	250	C		0.142097	0.452128	0.440729	0.452128	0.541033	0.155775	0.135258	0.12614	0.183131	0.349544	0.351824			47.5348	23.6232	23.6261	23.6232	23.6121	37.1468	55.9879	73.0133	28.5257	23.6902	23.6869
D	0.079	0.134	0.282	0.276	0.308	0.277	0.278	0.256	0.126	0.129	0.24	0.235		S4	0.106383	125	D		0.148936	0.486322	0.472644	0.545593	0.474924	0.477204	0.427052	0.130699	0.137538	0.390578	0.379179			41.5027	23.6171	23.6192	23.6118	23.6188	23.6185	23.6303	63.4956	52.842	23.6482	23.6567
E	0.056	0.155	0.259	0.292	0.273	0.249	0.27	0.242	0.131	0.139	0.123	0.142		S5	0.158815	62.5	E		0.196809	0.433891	0.509119	0.465805	0.411094	0.458967	0.395137	0.142097	0.160334	0.12386	0.167173			26.734	23.6281	23.6145	23.6204	23.6368	23.6217	23.6453	47.5348	34.9183	78.7032	32.3196
F	0.568	0.223	0.146	0.127	0.268	0.265	0.253	0.24	0.241	0.232	0.147	0.127		S6	0.234043	31.3	F		0.351824	0.196809	0.146657	0.454407	0.447568	0.420213	0.390578	0.392857	0.37234	0.178571	0.132979			23.6869	26.734	43.2963	23.6227	23.6243	23.6329	23.6482	23.6467	23.6628	29.3694	59.5216
G	0.54	0.25	0.155	0.133	0.301	0.229	0.261	0.206	0.228	0.235	0.182	0.198		S7	0.319909	15.6	G		0.413374	0.176292	0.132979	0.529635	0.365502	0.43845	0.31307	0.363222	0.379179	0.258359	0.294833			23.6357	29.8533	59.5216	23.6128	23.6697	23.6267	23.7741	23.6723	23.6567	24.1693	23.8512
H	3.263	0.231	0.129	0.128	0.228	0.225	0.257	0.22	0.24	0.224	0.217	0.216		S8	0.344225	7.8	H		0.370061	0.137538	0.135258	0.363222	0.356383	0.429331	0.344985	0.390578	0.354103	0.338146	0.335866			23.665	52.842	55.9879	23.6723	23.6806	23.6296	23.6975	23.6482	23.6837	23.7097	23.7142
Plate 3	1	2	3	4	5	6	7	8	9	10	11	12		Standatd curve:	Y1 = 23,6067717700408+(1002,53102723115-23,6067717700408)/(1 + (X1 / 7,92479808836819E-02) ^ 6,3135252956177)		Plate 3	1	2	3	4	5	6	7	8	9	10	11	12		1	2	3	4	5	6	7	8	9	10	11	12
A	0.075	0.086	0.248	0.224	0.195	0.222	0.249	0.215	0.225	0.228	0.243	0.223					A		0.0395137	0.408815	0.354103	0.287994	0.349544	0.411094	0.333587	0.356383	0.363222	0.397416	0.351824			990.585	23.6378	23.6837	23.8903	23.6902	23.6368	23.7189	23.6806	23.6723	23.6439	23.6869
B	0.088	0.128	0.245	0.227	0.21	0.215	0.205	0.211	0.225	0.239	0.254	0.212					B		0.135258	0.401976	0.360942	0.322188	0.333587	0.31079	0.324468	0.356383	0.388298	0.422492	0.326748			55.9879	23.6413	23.6749	23.7464	23.7189	23.782	23.7403	23.6806	23.6498	23.632	23.7346
C	0.084	0.114	0.214	0.227	0.207	0.212	0.191	0.213	0.221	0.22	0.235	0.25					C		0.103343	0.331307	0.360942	0.31535	0.326748	0.278875	0.329027	0.347264	0.344985	0.379179	0.413374			177.899	23.7238	23.6749	23.7667	23.7346	23.9541	23.7291	23.6938	23.6975	23.6567	23.6357
D	0.094	0.111	0.235	0.225	0.195	0.202	0.225	0.217	0.187	0.217	0.234	0.238					D		0.0965046	0.379179	0.356383	0.287994	0.303951	0.356383	0.338146	0.269757	0.338146	0.3769	0.386018			242.663	23.6567	23.6806	23.8903	23.8085	23.6806	23.7097	24.0352	23.7097	23.6586	23.6514
E	0.086	0.134	0.244	0.232	0.217	0.215	0.219	0.221	0.203	0.205	0.228	0.23					E		0.148936	0.399696	0.37234	0.338146	0.333587	0.342705	0.347264	0.306231	0.31079	0.363222	0.367781			41.5027	23.6426	23.6628	23.7097	23.7189	23.7013	23.6938	23.7992	23.782	23.6723	23.6673
F	0.5	0.155	0.21	0.225	0.213	0.206	0.196	0.226	0.214	0.227	0.221	0.222					F		0.196809	0.322188	0.356383	0.329027	0.31307	0.290274	0.358663	0.331307	0.360942	0.347264	0.349544			26.734	23.7464	23.6806	23.7291	23.7741	23.8765	23.6777	23.7238	23.6749	23.6938	23.6902
G	0.485	0.178	0.215	0.239	0.202	0.173	0.182	0.216	0.203	0.215	0.212	0.202					G		0.24924	0.333587	0.388298	0.303951	0.237842	0.258359	0.335866	0.306231	0.333587	0.326748	0.303951			24.3125	23.7189	23.6498	23.8085	24.5549	24.1693	23.7142	23.7992	23.7189	23.7346	23.8085
H	3.072	0.2	0.186	0.205	0.198	0.272	0.325	0.203	0.238	0.225	0.241	0.281					H		0.299392	0.267477	0.31079	0.294833	0.463526	0.584347	0.306231	0.386018	0.356383	0.392857	0.484043			23.8287	24.0588	23.782	23.8512	23.6208	23.61	23.7992	23.6514	23.6806	23.6467	23.6175
	170126_01		170126_02		170126_03		170126_04		170127_01		170127_02		170127_03		170127_04		170130_01		170131_02		170131_01		170130_03
170126_01 #1	24.877	170126_02 #1	24.948	170126_03 #1	24.3546	170126_04 #1	24.1074	170127_01 #1	23.6149	170127_02 #1	23.6176	170127_03 #1	23.6335	170127_04 #1	23.6645	170130_01 #1	23.6608	170131_02 #1	23.7506	170131_01 #1	23.6976	170130_03 #1	23.759
170126_01 #2	31.1921	170126_02 #2	24.0779	170126_03 #2	25.1082	170126_04 #2	24.0865	170127_01 #2	23.6166	170127_02 #2	23.6153	170127_03 #2	23.6405	170127_04 #2	23.6659	170130_01 #2	23.6581	170131_02 #2	23.8494	170131_01 #2	23.7771	170130_03 #2	23.666
170126_01 #3	25.7073	170126_02 #3	24.406	170126_03 #3	25.8067	170126_04 #3	23.9616	170127_01 #3	23.6247	170127_02 #3	23.6286	170127_03 #3	23.7004	170127_04 #3	23.6623	170130_01 #3	23.6994	170131_02 #3	23.7143	170131_01 #3	23.9418	170130_03 #3	23.6654
170126_01 #4	24.414	170126_02 #4	24.414	170126_03 #4	24.0571	170126_04 #4	24.3051	170127_01 #4	23.6182	170127_02 #4	23.6235	170127_03 #4	23.6635	170127_04 #4	23.6657	170130_01 #4	23.6687	170131_02 #4	23.7516	170131_01 #4	23.7046	170130_03 #4	23.6833
170126_01 #5	25.2207	170126_02 #5	24.1246	170126_03 #5	24.6075	170126_04 #5	24.1044	170127_01 #5	23.6213	170127_02 #5	23.6413	170127_03 #5	23.6279	170127_04 #5	23.6886	170130_01 #5	23.6527	170131_02 #5	24.1817	170131_01 #5	23.6765	170130_03 #5	23.6462
170126_01 #6	24.8312	170126_02 #6	25.0507	170126_03 #6	23.9047	170126_04 #6	24.0448	170127_01 #6	35.0152	170127_02 #6	23.6765	170127_03 #6	23.6483	170127_04 #6	23.6525	170130_01 #6	23.7135	170131_02 #6	23.736	170131_01 #6	23.6652	170130_03 #6	23.655
170126_01 #7	24.3366	170126_02 #7	25.3197	170126_03 #7	27.9424	170126_04 #7	28.3436	170127_01 #7	44.6874	170127_02 #7	24.0989	170127_03 #7	50.7695	170127_04 #7	55.5114	170130_01 #7	23.6843	170131_02 #7	23.6778	170131_01 #7	23.6956	170130_03 #7	23.6698
170126_01 #8	23.6085	170126_02 #8	40.2216	170126_03 #8	54.3968	170126_04 #8	51.4442	170127_01 #8	54.4149	170127_02 #8	23.6755	170127_03 #8	58.1688	170127_04 #8	44.4455	170130_01 #8	23.9204	170131_02 #8	23.7612	170131_01 #8	23.8724	170130_03 #8	23.692
170126_01 #9	23.6197	170126_02 #9	55.7304	170126_03 #9	40.1081	170126_04 #9	46.4164	170127_01 #9	24.3684	170127_02 #9	46.5673	170127_03 #9	41.2266	170127_04 #9	24.0103	170130_01 #9	23.7903	170131_02 #9	23.8416	170131_01 #9	23.7906	170130_03 #9	23.7715
170126_01 #10	23.6513	170126_02 #10	23.9549	170126_03 #10	24.0644	170126_04 #10	30.3071	170127_01 #10	23.6098	170127_02 #10	23.6244	170127_03 #10	23.6547	170127_04 #10	23.7119	170130_01 #10	23.7326	170131_02 #10	23.6952	170131_01 #10	23.6994	170130_03 #10	23.6321
pFRG	pFRG	pFRG	pFRG	pFRG	pFRG	pFRG	pFRG	pFRG	preBötC	preBötC	pFRG
WT	MrgA1	MrgA1	MrgA1	MrgA1	MrgA1	MrgA1	MrgA1	WT	MrgA1	WT	WT
170126_01	170126_02	170126_03	170126_04	170127_01	170127_02	170127_03	170127_04	170130_01	170131_02	170131_01	170130_03
24.877	24.948	24.3546	24.1074	23.6149	23.6176	23.6335	23.6645	23.6608	23.7506	23.6976	23.759
31.1921	24.0779	25.1082	24.0865	23.6166	23.6153	23.6405	23.6659	23.6581	23.8494	23.7771	23.666
25.7073	24.406	25.8067	23.9616	23.6247	23.6286	23.7004	23.6623	23.6994	23.7143	23.9418	23.6654
24.414	24.414	24.0571	24.3051	23.6182	23.6235	23.6635	23.6657	23.6687	23.7516	23.7046	23.6833
25.2207	24.1246	24.6075	24.1044	23.6213	23.6413	23.6279	23.6886	23.6527	24.1817	23.6765	23.6462
24.8312	25.0507	23.9047	24.0448	35.0152	23.6765	23.6483	23.6525	23.7135	23.736	23.6652	23.655
24.3366	25.3197	27.9424	28.3436	44.6874	24.0989	50.7695	55.5114	23.6843	23.6778	23.6956	23.6698
23.6085	40.2216	54.3968	51.4442	54.4149	23.6755	58.1688	44.4455	23.9204	23.7612	23.8724	23.692
23.6197	55.7304	40.1081	46.4164	24.3684	46.5673	41.2266	24.0103	23.7903	23.8416	23.7906	23.7715
23.6513	23.9549	24.0644	30.3071	23.6098	23.6244	23.6547	23.7119	23.7326	23.6952	23.6994	23.6321

## Sheet: 4 5 Param
	XLSTAT 2017.02.43172 - 4/5-parameter parallel lines logistic regression - Start time: 2017-03-24 at 13:58:53 / End time: 2017-03-24 at 13:58:57 / Microsoft Excel 16.04510
	Y / Quantitative: Workbook = Elisa results.xlsx / Sheet = Sheet1 / Range = Sheet1!$Q$14:$Q$21 / 8 rows and 1 column
	X / Quantitative: Workbook = Elisa results.xlsx / Sheet = Sheet1 / Range = Sheet1!$P$14:$P$21 / 8 rows and 1 column
	Model: 4PL
	Stop conditions: Iterations = 100 / Convergence = 0,00001
	Confidence interval (%): 95
	Run again:
	Summary statistics:
	Variable	Observations	Obs. with missing data	Obs. without missing data	Minimum	Maximum	Mean	Std. deviation
	Y1	8	0	8	7.8	1000	249.025	345.834
	X1	8	0	8	0.031155	0.344225	0.167743	0.110497
	Goodness of fit statistics:
	Observations	8
	DF	4
	R²	0.996907
	SSE	2589.47
	MSE	647.368
	RMSE	25.4434
	Iterations	90
	Model parameters:
	Parameter	Value	Standard error
	a	23.6068	13.4179
	b	6.31353	0.753745
	c	0.079248	0.00152647
	d	1002.53	25.9358
	Equation of the model:
	Y1 = 23,6067717700408+(1002,53102723115-23,6067717700408)/(1 + (X1 / 7,92479808836819E-02) ^ 6,3135252956177)
	Predictions and residuals:
	Observations	Sample	X1	Y1	Pred(Y1)	Residuals
	Obs1	0	0.031155	1000	999.842	0.158468
	Obs2	0	0.0797872	500	502.592	-2.59217
	Obs3	0	0.0980243	250	226.346	23.6536
	Obs4	0	0.106383	125	155.573	-30.5732
	Obs5	0	0.158815	62.5	35.6107	26.8893
	Obs6	0	0.234043	31.3	24.6563	6.64371
	Obs7	0	0.289514	15.6	23.881	-8.28101
	Obs8	0	0.344225	7.8	23.6987	-15.8987
